# Supplementary material for: Using physician-linked mailed invitations in an organised colorectal cancer screening programme: effectiveness and factors associated with response
Source: PubMed Central journal article supplement — BMJ Open. 2014 Mar 12;4(3):e004494. doi: 10.1136/bmjopen-2013-004494 (PMC3963151; doi:10.1136/bmjopen-2013-004494), 2014-03-12
Supplement: bmjopen-2013-004494.draft_revisions.pdf [file bmjopen-2013-004494.draft_revisions.pdf]

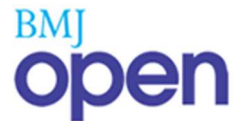

**Physician-linked mailed invitation to be screened improves uptake in an organized colorectal cancer screening program: Two linked cohort studies.**

|                                 |                                                                                                                                                                                                                                                                                                                                                       |
|---------------------------------|-------------------------------------------------------------------------------------------------------------------------------------------------------------------------------------------------------------------------------------------------------------------------------------------------------------------------------------------------------|
| Journal:                        | <i>BMJ Open</i>                                                                                                                                                                                                                                                                                                                                       |
| Manuscript ID:                  | bmjopen-2013-004494                                                                                                                                                                                                                                                                                                                                   |
| Article Type:                   | Research                                                                                                                                                                                                                                                                                                                                              |
| Date Submitted by the Author:   | 18-Nov-2013                                                                                                                                                                                                                                                                                                                                           |
| Complete List of Authors:       | Tinmouth, Jill; Sunnybrook Health Sciences Centre, Baxter, Nancy; University of Toronto, St Michaels Hospital, Surgery Paszat, Lawrence; Institute for Clinical Evaluative Sciences, Rabeneck, Linda; University of Toronto, Sutradhar, Rinku; Institute for Clinical Evaluative Sciences, Yun, Lingsong; Institute for Clinical Evaluative Sciences, |
| <b>Primary Subject Heading</b>: | Gastroenterology and hepatology                                                                                                                                                                                                                                                                                                                       |
| Secondary Subject Heading:      | Oncology, Public health, General practice / Family practice, Health services research                                                                                                                                                                                                                                                                 |
| Keywords:                       | Gastrointestinal tumours < GASTROENTEROLOGY, PREVENTIVE MEDICINE, PRIMARY CARE, PUBLIC HEALTH                                                                                                                                                                                                                                                         |
|                                 |                                                                                                                                                                                                                                                                                                                                                       |

SCHOLARONE™  
Manuscripts

Only

**TITLE PAGE**

**Title:** Physician-linked mailed invitation to be screened improves uptake in an organized colorectal cancer screening program: Two linked cohort studies.

**Short title:** Physician-linked invitations for colorectal cancer screening

**Authors:**

Jill Tinmouth<sup>1,3,5,6</sup>

Nancy N. Baxter<sup>3,5,7</sup>

Lawrence F. Paszat<sup>2,3,4</sup>

Linda Rabeneck<sup>1,3,4,5,6</sup>

Rinku Sutradhar<sup>3,4</sup>

Lingsong Yun<sup>3</sup>

**Affiliations:** Departments of Medicine<sup>1</sup> and Radiation Oncology<sup>2</sup>, Sunnybrook Health Sciences Centre, Toronto, Canada; Institute for Clinical Evaluative Sciences, Toronto, Canada<sup>3</sup>; Dalla Lana School of Public Health, University of Toronto, Toronto, Canada<sup>4</sup>; Institute of Health Policy Management and Evaluation, University of Toronto, Toronto, Canada<sup>5</sup>; Cancer Care Ontario, Toronto, Canada<sup>6</sup>; Department of General Surgery and Li Ka Shing Knowledge Institute, St. Michael's Hospital, Toronto, Canada<sup>7</sup>.

**Corresponding Author Information:**

Jill Tinmouth MD PhD FRCPC

Sunnybrook Health Sciences Centre

2075 Bayview Ave Rm HG40

Toronto ON M4N 3M5

416 480-5910 t

416 480-4845 f

[jill.tinmouth@sunnybrook.ca](mailto:jill.tinmouth@sunnybrook.ca)

**Email addresses of authors:**

Nancy N. Baxter [BaxterN@smh.toronto.on.ca](mailto:BaxterN@smh.toronto.on.ca)

Lawrence F. Paszat [lawrence.paszat@ices.on.ca](mailto:lawrence.paszat@ices.on.ca)

Linda Rabeneck [Linda.Rabeneck@cancercare.on.ca](mailto:Linda.Rabeneck@cancercare.on.ca)

Rinku Sutradhar [Rinku.Sutradhar@ices.on.ca](mailto:Rinku.Sutradhar@ices.on.ca)

Lingsong Yun [Lingsong.Yun@ices.on.ca](mailto:Lingsong.Yun@ices.on.ca)

**Word count:** 2637 (main text), 242 (abstract)

**Number of Tables:** 4

Tinmouth et al.

Physician-linked mailed invitations for colorectal cancer screening

1  
2  
3  
4  
5  
6  
7  
8  
9  
10  
11  
12  
13  
14  
15  
16  
17  
18  
19  
20  
21  
22  
23  
24  
25  
26  
27  
28  
29  
30  
31  
32  
33  
34  
35  
36  
37  
38  
39  
40  
41  
42  
43  
44  
45  
46  
47  
48  
49  
50  
51  
52  
53  
54  
55  
56  
57  
58  
59  
60

**Number of Figures:** 1

**Number of References:** 40

**Key words:** Mailed invitations, colorectal cancer, organized screening

For peer review only

**ABSTRACT**

Objectives: A central tenet of organized cancer screening is that all persons in a target population are invited. The aims of this study are to identify patient and physician factors associated with response to mailed physician-linked invitations (Study 1) and to evaluate their effectiveness in an organized colorectal (CRC) screening program (Study 2).

Design and setting: Two linked cohort studies conducted in context of Ontario's organized province-wide CRC screening program.

Participants: 102 family physicians and 11,302 associated eligible patients participating in a technical evaluation ("the Pilot") of large scale mailed invitations for CRC screening were included. Matched controls were randomly selected using propensity scores from among eligible patients associated with family physicians in similar practice types as the Pilot physicians.

Intervention: Physician-linked mailed invitation to have CRC screening.

Outcomes: Uptake of FOBT within 6 months of mailed invitation (primary) and uptake of FOBT or colonoscopy within 6 months of mailed invitation (secondary).

Results: Factors significantly associated with uptake of FOBT included prior FOBT use, older patient age, greater patient co-morbidity and having a female physician. In the matched analysis, Pilot patients were more likely to complete an FOBT (22% vs. 8%,  $p < 0.0001$ ) or an FOBT or colonoscopy (25% vs. 11%,  $p < 0.0001$ ) within 6 months of

Tinmouth et al.

Physician-linked mailed invitations for colorectal cancer screening

1  
2  
3  
4 mailed invitation than matched controls. The number needed to invite to screen one  
5  
6  
7 additional person was 7.  
8  
9

10 Conclusions: Centralized large scale mailing of physician-linked invitations is both  
11  
12 feasible and effective in an organized CRC screening program.  
13  
14  
15  
16  
17  
18  
19  
20  
21  
22  
23  
24  
25  
26  
27  
28  
29  
30  
31  
32  
33  
34  
35  
36  
37  
38  
39  
40  
41  
42  
43  
44  
45  
46  
47  
48  
49  
50  
51  
52  
53  
54  
55  
56  
57  
58  
59  
60

For peer review only

**ARTICLE SUMMARY**

Strengths and limitations of this study:

- Implementation and effectiveness of physician-linked invitations in an organized colorectal screening program have not yet been reported
- We have shown that centralized large scale mailing of physician-linked invitations is feasible
- We found that physician linked mailed invitations improve CRC screening participation by 14% such that 7 physician-linked invitations need to be mailed to screen one additional person
- We were limited to data found in Ontario health administrative databases; for example, we were not able to determine family history
- Findings are promising but require appropriate infrastructure in order to be implemented in other jurisdictions

## INTRODUCTION

Colorectal cancer (CRC) is the 3<sup>rd</sup> most common cancer and the 4<sup>th</sup> leading cause of cancer-related death worldwide.[1] FOBT[2-4] and flexible sigmoidoscopy[5-7] have been shown to decrease CRC mortality in randomized controlled trials.

Given these data, organized CRC screening programs[8] are being implemented worldwide.[9] On April 1 2008, Ontario launched Canada's first organized province-wide CRC screening program, ColonCancerCheck (CCC).[10] CCC has a dual strategy: through the primary care physician, FOBT is offered to people at average risk for CRC and colonoscopy to those at increased risk based on family history. The CCC program uses a non-rehydrated guaiac FOBT (Hema-Screen, Immunostics, Inc., NJ, USA) requiring 3 stool samples from separate stools. The only recommended dietary restriction is to avoid vitamin C for 3 days prior to and during the collection period.

A central tenet of organized screening programs is that all persons in the target population be invited to participate.[8] Operationalization of this strategy can vary: invitations may be sent with an FOBT kit, can include physician recommendation or may incorporate tailored messaging.[11 ,12] Some of these approaches, such as incorporation of physician recommendation, present significant implementation challenges for organized screening programs such as Ontario's.

1  
2  
3  
4 In 2009, the CCC program conducted the CCC Invitation Pilot (the “Pilot”), an evaluation  
5 that tested the technical feasibility of a centralized approach to sending physician-linked  
6 mailed invitations for CRC screening. In this paper, we describe the structure and the  
7 implementation of the Pilot. In addition, we report on patient and physician factors  
8 associated with response to mailed physician-linked invitations and on the effectiveness  
9 of these invitations in an organized CRC screening program.  
10  
11  
12  
13  
14  
15  
16  
17  
18  
19  
20

## 21 **METHODS**

### 22 **The CCC Invitation Pilot – Implementation and Evaluation**

23  
24  
25 The Pilot was conducted by CCC in November 2009 in order to develop and test the  
26 technical infrastructure required for large scale centralized physician-linked mailed  
27 invitations in Ontario. For the Pilot, invitation letters were generated by the CCC  
28 program on behalf of 102 family physicians and sent to all their eligible enrolled patients.  
29  
30 Just over 11,000 patients received mailed invitations requesting they visit their family  
31 physician to obtain an FOBT kit or, if appropriate based on family history, a referral for  
32 colonoscopy. In this paper, we report on the 2 linked quantitative studies done using this  
33 cohort. Ethics approval was obtained from the research ethics boards at Sunnybrook  
34 Health Sciences Centre and the Institute for Clinical Evaluative Sciences (ICES) and  
35 permission to use the Pilot data was obtained from Cancer Care Ontario’s Data Access  
36  
37  
38  
39  
40  
41  
42  
43  
44  
45  
46  
47  
48  
49  
50  
51  
52  
53  
54  
55  
56  
57  
58  
59  
60



1  
2  
3  
4  
5  
6  
7  
8  
9  
10  
11  
12  
13  
14  
15  
16  
17  
18  
19  
20  
21  
22  
23  
24  
25  
26  
27  
28  
29  
30  
31  
32  
33  
34  
35  
36  
37  
38  
39  
40  
41  
42  
43  
44  
45  
46  
47  
48  
49  
50  
51  
52  
53  
54  
55  
56  
57  
58  
59  
60

Committee. All analyses were conducted using SAS v.9 (SAS Institute, Cary, NC). A p-value of 0.05 was used to determine statistical significance.

### Data Sources

The quantitative Pilot study was conducted at ICES which holds the administrative health records for all 12.4 million Ontarians. CCC program databases were linked to the ICES administrative databases using an encrypted version of the provincial health insurance number.

The ICES databases used include the Canadian Institute of Health Information (CIHI) databases, the Ontario Health Insurance Program (OHIP) Claims History Database, the Registered Persons Database (RPDB), the Ontario Cancer Registry, the ICES Physician Database, and the Client Agency Program Enrollment (CAPE) registry. The CIHI, OHIP, RPDB and the Ontario Cancer Registry and the ICES Physician Database have been previously described.[13 ,14] The CAPE registry tracks patients registered to a specific physician in patient enrolled models (PEMs) of care. PEMs comprise family physicians who provide enrolled patients with comprehensive health care and extended hours; PEM physicians receive incentives for the use of preventive care measures such as CRC screening.[15] PEMs vary in terms of structure, services provided and remuneration (varying from enhance fee-for-service to blended capitation). It is estimated that 75% of Ontario residents received their care via a PEM in 2009.[16]

1  
2  
3  
4  
5  
6  
7 The CCC program has collected data on CRC screening since its inception using  
8  
9 Laboratory Reporting Tool (LRT) and comprises data related to the FOBT kits  
10  
11 administered by the CCC program, including the results of these tests.  
12  
13

### 14 15 16 **Study 1: Factors associated with response to the mailed invitation**

17  
18 Cohort Definition: For the Pilot, a convenience sample of physicians participating in PEM  
19  
20 practices was recruited via Cancer Care Ontario's Provincial Primary Care Cancer  
21  
22 Network. Prior to the Pilot mailing, CCC generated lists of patients eligible for CRC  
23  
24 screening for each participating physician using CAPE, Ontario Cancer Registry, OHIP,  
25  
26 CIRT and LRT. Patients aged 50 to 74 years without a history of CRC and who were  
27  
28 due for CRC screening (without a record of recent FOBT (previous two years) or lower  
29  
30 GI investigation including flexible sigmoidoscopy and colonoscopy (previous 5 years))  
31  
32 were eligible.  
33  
34  
35  
36  
37  
38  
39

40 The Mailing: Invitations were mailed in November 2009. The date of mailing was the  
41  
42 index date. The letters were compiled centrally by the CCC program but were physician-  
43  
44 linked; patients received a letter from their own physician, as indicated by their name at  
45  
46 the bottom of the letter in an italicized font (Figure 1). The letter asked patients to visit  
47  
48 their family physician for screening; it did not include an FOBT kit. They were  
49  
50  
51  
52  
53  
54  
55  
56  
57  
58  
59  
60

Tinmouth et al.

Physician-linked mailed invitations for colorectal cancer screening

1  
2  
3  
4 accompanied by an CRC screening information brochure and sent in an envelope with  
5  
6  
7 the family physician name in the front upper left corner.  
8  
9

10  
11 Response to Mailed Invitation: We defined response to the mailed invitation as a record  
12  
13 of FOBT in OHIP or in LRT within 6 months of the index date. We were not able to  
14  
15 measure response in persons at increased risk of CRC as we do not have family history  
16  
17 data available in the administrative databases.  
18  
19

20  
21  
22  
23 Patient and Physician Factors: We characterized patients by age group, sex, co-  
24  
25 morbidity, median neighborhood income[17 ,18], health region[19], immigration status,  
26  
27 and prior FOBT. Comorbidity was measured by counting the number of Aggregated  
28  
29 Diagnosis Groups (ADGs) in the prior 12 months according to the Johns Hopkins ACG  
30  
31 Case-Mix System.[20] This system has been shown to accurately predict mortality in a  
32  
33 general population ambulatory cohort in Ontario.[21] We used date of registration in the  
34  
35 RPDB as a proxy measure for immigration status; patients were considered recent  
36  
37 immigrants if their date of registration was within 5 years of the index date.[22]  
38  
39  
40  
41  
42  
43

44 Physicians were characterized according to age, sex, training location (attended  
45  
46 Canadian medical school vs. outside of Canada), practice type, size of practice, age-  
47  
48 eligible rate of colonoscopy or FOBT over prior 2 years as well as the age-eligible rate of  
49  
50 annual physical exams or influenza vaccinations in the prior year. All physicians were in  
51  
52  
53  
54  
55  
56  
57  
58  
59  
60

1  
2  
3  
4 PEMs; practice types included family health groups (FHGs, enhanced fee-for-service  
5  
6 models), family health organizations or networks (FHO/FHNs, blended capitation  
7  
8 models), FHO/FHN with family health team (FHO/FHN-FHT, interprofessional team  
9  
10 model with a blended capitation fee structure) and other PEMs.[23] We measured  
11  
12 practice size as the number of enrolled patients stratified in a binary fashion ( $\leq 1800$  vs.  
13  
14  $>1800$  enrolled patients) as larger practice sizes have been shown to be associated with  
15  
16 poorer preventative care.[24] For the remaining physician characteristics, we identified  
17  
18 all enrolled and non-enrolled patients aged 50-74 years in their practices as of the index  
19  
20 date. Age-eligible FOBT and colonoscopy rates were obtained for each Pilot physician  
21  
22 by calculating the proportion of their age-eligible patients who had had an FOBT or  
23  
24 colonoscopy in the 2 years prior to the index date. Similarly, we calculated their rates of  
25  
26 age-eligible annual physical exams or influenza vaccine in the year prior to the index  
27  
28 date. These variables were derived in order to estimate physician adherence to CRC  
29  
30 screening and preventive medicine practices at baseline.  
31  
32  
33  
34  
35  
36  
37  
38  
39

40 Analysis: The number and proportion of persons in the cohort who responded to the  
41  
42 mailed invitation within 6 months was determined overall and by patient and physician  
43  
44 characteristics. Multivariate logistic regression modeling was used to identify patient and  
45  
46 physician factors associated with response to the mailed invitation. In order to account  
47  
48 for potential clustering of patients within physicians, Generalized Estimating Equations  
49  
50 (GEE) were used in the model.  
51  
52  
53  
54  
55  
56  
57  
58  
59  
60

## Study 2: Evaluation of the effectiveness of mailed invitations

Overview and study participants: This was a matched double cohort analysis, comparing uptake of FOBT in those who received a mailed invitation (Pilot cohort) to a matched control group who were not sent a mailed invitation. The Pilot cohort comprised all members of the cohort described in Study 1 for whom a matched control could be identified. We identified potential patient controls as follows: 1) Pilot physicians were matched to non-Pilot physicians practicing in PEMs in a 1:5 ratio using physician age, sex, size and practice type; 2) enrolled patients belonging to the selected control physicians were retained if they met the same inclusion/exclusion criteria as those in the intervention cohort (aged 50 to 74 years with no prior CRC who were due for CRC screening). Propensity scores that modeled the probability of belonging to the Pilot group were calculated for each patient. The variables in this model included age (as a continuous measure), sex, co-morbidity, median neighborhood income quintile, health region, immigration status, and FOBT from 2 to 5 years prior.[25 ,26] Pilot patients were matched to controls in a 1:1 fashion based on propensity scores using a caliper width of 0.25. This methodology was implemented to balance the distribution of patient-level variables between the Pilot and control groups.

Response to mailed invitation: For our primary outcome, we defined response to the mailed invitation as above, FOBT within 6 months of the index date. For our secondary

1  
2  
3  
4 outcome, response was defined as a record of either FOBT or colonoscopy (in OHIP)  
5  
6 within 6 months of the index date. For the purposes of this study, controls were assigned  
7  
8 the same index date as their matched counterpart in the Pilot group.  
9  
10

11  
12  
13  
14 Analysis: Standard differences between the Pilot participants and controls were  
15  
16 calculated for the variables included in the propensity score. Important differences  
17  
18 between the 2 groups were defined by a standardized difference exceeding 0.1.[26 ,27]  
19  
20 In the primary analysis, we compared the number and proportion in the Pilot and control  
21  
22 groups responding to the mailed invitation with FOBT using McNemar's test.[26] We  
23  
24 determined the number of invitations mailed in order to screen one additional person  
25  
26 with FOBT. We repeated the above analyses using our secondary outcome in order to  
27  
28 determine if observed differences in FOBT uptake could be attributed to a differences in  
29  
30 colonoscopy uptake (i.e., patients had CRC screening but chose colonoscopy over  
31  
32 FOBT). As the matching only accounted for patient level variables, we repeated our  
33  
34 analyses using conditional logistic regression in order to adjust for physician covariates  
35  
36 (age, sex, practice type and size).  
37  
38  
39  
40  
41  
42  
43  
44

## 45 RESULTS

### 46 Study 1: Factors associated with response to the mailed invitation

47  
48  
49  
50  
51  
52  
53  
54  
55  
56  
57  
58  
59  
60

Tinmouth et al.

Physician-linked mailed invitations for colorectal cancer screening

1  
2  
3  
4 There were 11,311 eligible patients associated with the 102 family physicians in the Pilot  
5  
6 cohort. Nine patients were excluded as we were unable to determine their health region  
7  
8 and/or income quintile; this left 11,302 patients for the analysis. The majority of patients  
9  
10 were 50 to 59 years of age, 52% were women, 48% had no or low co-morbidity and 14%  
11  
12 had completed an FOBT from 2 to 5 years prior to the mailing. Two thirds of patients had  
13  
14 a male physician, approximately half were part of a primary care team reimbursed via an  
15  
16 enhanced fee-for-service arrangement and just under half were enrolled in larger  
17  
18 practices (>1800 enrolled patients) (Table 1).  
19  
20  
21  
22  
23

24  
25 2503 (22%) completed an FOBT within 6 months of mailing. In the multivariate  
26  
27 regression, the strongest patient factor associated with FOBT completion was prior  
28  
29 FOBT use (2 to 5 years prior vs. > 5 years or never: OR 2.8, 95% C.I.: 2.5 to 3.3,  $p <$   
30  
31 0.0001). Other significant factors associated with FOBT completion included older  
32  
33 patient age, greater co-morbidity, and having a female physician (Table 2).  
34  
35  
36  
37  
38  
39

#### 40 **Study 2: Evaluation of the effectiveness of mailed invitations**

41  
42 Of the 11,302 patients in Study 1, 10,652 patients were successfully matched to 10,652  
43  
44 controls using propensity scores. Standardized differences for the patient  
45  
46 characteristics included in the propensity score were all <0.1, indicating that the two  
47  
48 cohorts were well matched for measurable potential confounders (Table 3).  
49  
50  
51  
52  
53  
54  
55  
56  
57  
58  
59  
60

1  
2  
3  
4 Pilot patients were significantly more likely than controls to complete FOBT alone (2387  
5 (22%) versus 854 (8%),  $p < 0.0001$ ) and FOBT or colonoscopy (2664 (25%) vs. 1191  
6  
7 (11%),  $p < 0.0001$ ) within 6 months of mailing. The association between the mailed  
8  
9 invitation and CRC screening participation (either FOBT alone or FOBT or colonoscopy)  
10  
11 remained after adjusting for physician level characteristics (Table 4).  
12  
13  
14  
15  
16  
17  
18

## 19 DISCUSSION

20  
21 In the current study, we have demonstrated that physician-linked mailed invitations are  
22  
23 both feasible and effective in the context of a large organized, population-based  
24  
25 screening program; only 7 letters would need to be sent in order to screen one additional  
26  
27 person. Furthermore, we have found that older patients, those with greater co-morbidity,  
28  
29 those who have previously been screened and patients of female physicians were more  
30  
31 likely to respond to this type of invitation. Our findings are of particular interest to other  
32  
33 jurisdictions planning or who already have organized CRC screening.  
34  
35  
36  
37  
38  
39

40 In other published studies of mailed invitations, an FOBT kit is often included. Three  
41  
42 studies done outside organized screening programs have found physician-linked  
43  
44 invitations superior to non-linked invitations; 2 studies of invitations included an FOBT  
45  
46 kit,[28 ,29] and the third study did not.[30] Other studies have examined mailed  
47  
48 invitations with FOBT kits in the context of primary care practices in the USA.[31-33]  
49  
50

51 While the results from these trials were largely supportive of mailed invitations, kit  
52  
53  
54  
55  
56  
57  
58  
59  
60



1  
2  
3  
4 inclusion can make it difficult to separate the convenience of receiving the FOBT kit  
5  
6 directly by mail from the impact of an invitation from one's own physician.  
7  
8  
9

10  
11 Our study demonstrates the effectiveness and feasibility of physician-linked invitations in  
12 the context of a large organized CRC screening program with an estimated target  
13 population of over 3 million persons. Implementation in this context confers challenges in  
14 terms of technological infra-structure, privacy and regulatory issues. There are 2 studies  
15 (from the United Kingdom[34] and Italy[35]) that have reported on mailed invitations in  
16 the context of organized colorectal cancer screening programs and found them to be  
17 effective. Both studies included FOBT kits and one studied the impact of physician  
18 endorsement specifically.[34] Our findings are important because they support a  
19 potentially more cost-effective approach that avoids wasting kits that are mailed but not  
20 used.  
21  
22  
23  
24  
25  
26  
27  
28  
29  
30  
31  
32  
33  
34  
35  
36

37 Our results highlight the critical role of physician recommendation, a finding supported  
38 by others. For example, in the NHS Bowel Cancer Screening Programme (BCSP)  
39 currently, the primary care physician receives the result but is not directly involved in the  
40 mailed invitation or the actual screening. Recently, a randomized controlled trial  
41 conducted in the context of the BCSP showed that an endorsement letter from the  
42 primary care provider increased participation by 6%.[34] In 2 studies from Australia,  
43  
44  
45  
46  
47  
48  
49  
50  
51  
52  
53  
54  
55  
56  
57  
58  
59  
60

1  
2  
3  
4 endorsement improved initial participation[28 ,29] and over 4 successive screening  
5  
6 rounds.[29]  
7  
8  
9

10  
11 Our study has several limitations. As mentioned above, we are unable to determine  
12 family history using Ontario administrative data. A second limitation is that a single  
13 generic letter was used. Tailored letters with key messages for specific subgroups may  
14 be more effective,[12] a finding that may be relevant in Ontario as we did find that  
15 response to the letter appeared to differ in various subgroups. Finally, while our findings  
16 are promising, there are challenges to widespread implementation in other population-  
17 based screening programs, including the requirement for a centralized database that  
18 links patients and physicians. Finally, implementation of this strategy in population  
19 based screening is predicated on physician acceptability and agreement. While we  
20 have found that this approach is acceptable in principle to many Ontario physicians,[36]  
21 processes to determine physician agreement have not been worked out for the entire  
22 CCC program which comprises an estimated 7000 primary care physicians.  
23  
24  
25  
26  
27  
28  
29  
30  
31  
32  
33  
34  
35  
36  
37  
38  
39  
40  
41

## 42 **CONCLUSIONS**

43  
44 In summary, we have demonstrated that physician-linked mailed invitations for CRC  
45 screening, even without the inclusion of an FOBT kit, can have substantial effect on  
46 participation in an organized CRC screening program and that it is technically feasible to  
47 centrally organize and mail physician-linked invitations on a large scale. Organized  
48  
49  
50  
51  
52  
53  
54  
55  
56  
57  
58  
59  
60

Tinmouth et al.

Physician-linked mailed invitations for colorectal cancer screening

1  
2  
3  
4 screening programs, which often use unlinked invitations, should consider adopting this  
5  
6 approach given its demonstrated effectiveness and feasibility.  
7  
8  
9

## 10 11 **ACKNOWLEDGEMENTS**

12  
13  
14 The authors would like to acknowledge Peter Austin PhD for his expert statistic advice.

15  
16 They also wish to acknowledge the support of the Institutes for Clinical Evaluative  
17  
18 Sciences, the Ontario Ministry of Health and Long Term Care and Cancer Care Ontario.  
19

20  
21 The opinions, results and conclusions reported in this paper are those of the authors and  
22  
23 are independent from the funding sources. No endorsement by Institutes for Clinical  
24  
25 Evaluative Sciences, the Ontario Ministry of Health and Long Term Care and Cancer  
26  
27 Care Ontario is intended or should be inferred.  
28  
29  
30  
31

## 32 33 **COMPETING INTERESTS STATEMENT**

34  
35 Dr. Tinmouth is the Lead Scientist for the ColonCancerCheck program and Dr.  
36  
37 Rabeneck oversees the ColonCancerCheck program in her capacity as the Vice-  
38  
39 President, Cancer Prevention and Control at Cancer Care Ontario. None of the other  
40  
41 authors have any conflicts of interest to report.  
42  
43  
44  
45

## 46 47 **FUNDING STATEMENT**

48  
49 This study was conducted with the support of the Ontario Institute for Cancer Research  
50  
51 and Cancer Care Ontario's Health Services Research Network, which is independent of  
52  
53  
54  
55  
56  
57  
58  
59  
60

1  
2  
3  
4 the ColonCancerCheck program, provided funding for this work. This work was also  
5  
6 supported in part by a grant from the Canadian Institutes for Health Research (grant #  
7  
8 CST-85478). Dr. Tinmouth was supported by a Canadian Institutes of Health Research  
9  
10 New Investigator Award during the period of this study.  
11  
12  
13

#### 14 15 16 17 **AUTHOR CONTRIBUTION:**

18  
19 Authors contributed substantially to each of the following areas:

20  
21 -conception and design (JT, LFP, LR) or analysis and interpretation of data (JT, NB,  
22  
23

24 LFP, LR, RS, LY)

25  
26 -drafting the article (JT) or revising it critically for important intellectual content (JT, NB,  
27  
28

29 LFP, LR, RS, LY)

30  
31 -final approval of the version to be published (JT, NB, LFP, LR, RS, LY)  
32  
33  
34  
35  
36  
37  
38  
39  
40  
41  
42  
43  
44  
45  
46  
47  
48  
49  
50  
51  
52  
53  
54  
55  
56  
57  
58  
59  
60

## REFERENCES

1. Center MM, Jemal A, Ward E. International trends in colorectal cancer incidence rates. *Cancer Epidemiol. Biomarkers Prev.* 2009;**18**(6):1688-94.
2. Mandel JS, Church TR, Bond JH, et al. The effect of fecal occult-blood screening on the incidence of colorectal cancer. *N. Engl. J. Med.* 2000;**343**(22):1603-7.
3. Hardcastle JD, Chamberlain JO, Robinson MH, et al. Randomised controlled trial of faecal-occult-blood screening for colorectal cancer. *Lancet* 1996;**348**(9040):1472-7.
4. Kronborg O, Fenger C, Olsen J, et al. Randomised study of screening for colorectal cancer with faecal-occult-blood test. *Lancet* 1996;**348**(9040):1467-71.
5. Atkin WS, Edwards R, Kralj-Hans I, et al. Once-only flexible sigmoidoscopy screening in prevention of colorectal cancer: a multicentre randomised controlled trial. *Lancet* 2010;**375**(9726):1624-33.
6. Segnan N AP, Bonelli L, Risio M, Sciallero S, Zappa M, Andreoni B, Arrigoni A, Bisanti L, Casella C, Crosta C, Falcini F, Ferrero F, Giacomini A, Giuliani O, Santarelli A, Visioli CB, Zanetti R, Atkin WS, Senore C, and the SCORE Working Group. Once-Only Sigmoidoscopy in Colorectal Cancer Screening: Follow-up Findings of the Italian Randomized Controlled Trial—SCORE. *J. Natl. Cancer Inst.* 2011;**103**(17):1310-22.
7. Schoen RE, Pinsky PF, Weissfeld JL, et al. Colorectal-cancer incidence and mortality with screening flexible sigmoidoscopy. *N. Engl. J. Med.* 2012;**366**(25):2345-57 doi: 10.1056/NEJMoa1114635.
8. Miles A, Cockburn J, Smith RA, et al. A Perspective from Countries Using Organized Screening Programs. *Cancer* 2004;**104**(5 Suppl):1201-13.
9. International Cancer Screening Network. Inventory of Colorectal Cancer Screening Activities in ICSN Countries, May 2008. Last update: Feb 9 2009. <http://appliedresearch.cancer.gov/icsn/colorectal/screening.html>.
10. Anonymous. Colon Cancer Check: Ontario's colorectal cancer screening program. Last update: January 24, 2008 2012. [http://www.health.gov.on.ca/english/public/program/colorectal\\_cancer/colorectal\\_cancer\\_mn.html](http://www.health.gov.on.ca/english/public/program/colorectal_cancer/colorectal_cancer_mn.html).
11. Khalid-de Bakker C, Jonkers D, Smits K, et al. Participation in colorectal cancer screening trials after first-time invitation: a systematic review. *Endoscopy* 2011;**43**(12):1059-86 doi: 10.1055/s-0031-1291430.
12. Rawl SM, Skinner CS, Perkins SM, et al. Computer-delivered tailored intervention improves colon cancer screening knowledge and health beliefs of African-Americans. *Health Educ. Res.* 2012;**27**(5):868-85 doi: 10.1093/her/cys094.
13. Alharbi O, Rabeneck L, Sutradhar R, et al. A population-based analysis of outpatient colonoscopy in adults assisted by an anesthesiologist. *Anesthesiology* 2009;**111**(4):734-40.

14. Robles SC, Marrett LD, Clarke EA, et al. An application of capture-recapture methods to the estimation of completeness of cancer registration. *J. Clin. Epidemiol.* 1988;**41**(5):495-501.
15. HealthForceOntario. Family Practice Models. Last update: May 3 2013 2013. [http://www.healthforceontario.ca/Work/OutsideOntario/PhysiciansOutsideOntario/PractisingInOntario/family\\_practice\\_models.aspx](http://www.healthforceontario.ca/Work/OutsideOntario/PhysiciansOutsideOntario/PractisingInOntario/family_practice_models.aspx).
16. Glazier RH, Zagorski BM, Rayner J. Comparison of Primary Care Models in Ontario by Demographics, Case Mix and Emergency Department Use, 2008/09 to 2009/10. ICES Investigative Report. Toronto: Institute for Clinical Evaluative Sciences, 2012.
17. Alter DA, Naylor CD, Austin P, et al. Effects of socioeconomic status on access to invasive cardiac procedures and on mortality after acute myocardial infarction. *N. Engl. J. Med.* 1999;**341**(18):1359-67.
18. Singh SM, Paszat LF, Li C, et al. Association of socioeconomic status and receipt of colorectal cancer investigations: a population-based retrospective cohort study. *Can. Med. Assoc. J.* 2004;**171**(5):461-5.
19. Anonymous. Ontario's Local Health Integration Networks. Last update: May 30 2013 2013. <http://www.lhins.on.ca/home.aspx>.
20. Anonymous. The Johns Hopkins University ACG Case-Mix System. Last update: 2012. <http://www.acg.jhsph.edu/>.
21. Austin PC, van Walraven C, Wodchis WP, et al. Using the Johns Hopkins Aggregated Diagnosis Groups (ADGs) to predict mortality in a general adult population cohort in Ontario, Canada. *Med. Care* 2011;**49**(10):932-9 doi: 10.1097/MLR.0b013e318215d5e2.
22. Ray JG, Vermeulen MJ, Schull MJ, et al. Results of the Recent Immigrant Pregnancy and Perinatal Long-term Evaluation Study (RIPPLES). 2007;**176**(10):1419-26 doi: 10.1503/cmaj.061680.
23. Glazier RH, Klein-Geltink J, Kopp A, et al. Capitation and enhanced fee-for-service models for primary care reform: a population-based evaluation. *Can. Med. Assoc. J.* 2009;**180**(11):E72-E81 doi: 10.1503/cmaj.081316.
24. Dahrouge S, Hogg WE, Russell G, et al. Impact of remuneration and organizational factors on completing preventive manoeuvres in primary care practices. *CMAJ* 2012;**184**(2):E135-43 doi: 10.1503/cmaj.110407.
25. D'Agostino RB, Jr. Propensity score methods for bias reduction in the comparison of a treatment to a non-randomized control group. *Stat. Med.* 1998;**17**(19):2265-81.
26. Austin PC. An Introduction to Propensity Score Methods for Reducing the Effects of Confounding in Observational Studies. *Multivariate behavioral research* 2011;**46**(3):399-424 doi: 10.1080/00273171.2011.568786.
27. Normand ST, Landrum MB, Guadagnoli E, et al. Validating recommendations for coronary angiography following acute myocardial infarction in the elderly: a matched analysis using propensity scores. *J. Clin. Epidemiol.* 2001;**54**(4):387-98.

Tinmouth et al.

Physician-linked mailed invitations for colorectal cancer screening

28. Cole SR, Young GP, Byrne D, et al. Participation in screening for colorectal cancer based on a faecal occult blood test is improved by endorsement by the primary care practitioner. *J. Med. Screen.* 2002;**9**(4):147-52.
29. Zajac IT, Whibley AH, Cole SR, et al. Endorsement by the primary care practitioner consistently improves participation in screening for colorectal cancer: a longitudinal analysis. *J. Med. Screen.* 2010;**17**(1):19-24 doi: 10.1258/jms.2010.009101.
30. Grazzini G, Castiglione G, Isu A, et al. Colorectal cancer screening by fecal occult blood testing: results of a population-based experience. *Tumori* 2000;**86**(5):384-8.
31. Myers RE, Sifri R, Hyslop T, et al. A randomized controlled trial of the impact of targeted and tailored interventions on colorectal cancer screening. *Cancer* 2007;**110**(9):2083-91 doi: 10.1002/cncr.23022.
32. Sequist TD, Zaslavsky AM, Marshall R, et al. Patient and physician reminders to promote colorectal cancer screening: a randomized controlled trial. *Arch. Intern. Med.* 2009;**169**(4):364-71.
33. Walsh JM, Salazar R, Terdiman JP, et al. Promoting use of colorectal cancer screening tests. Can we change physician behavior? *J Gen Intern Med* 2005;**20**(12):1097-101.
34. Hewitson P, Ward AM, Heneghan C, et al. Primary care endorsement letter and a patient leaflet to improve participation in colorectal cancer screening: results of a factorial randomised trial. *Br. J. Cancer* 2011;**105**(4):475-80 doi: 10.1038/bjc.2011.255.
35. Giorgi Rossi P, Grazzini G, Anti M, et al. Direct mailing of faecal occult blood tests for colorectal cancer screening: a randomized population study from Central Italy. *J. Med. Screen.* 2011;**18**(3):121-7 doi: 10.1258/jms.2011.011009.
36. Tinmouth J, Ritvo P, McGregor SE, et al. ColonCancerCheck Primary Care Invitation Pilot project: family physician perceptions. *Can. Fam. Physician* 2012;**58**(10):e570-7.

## Tables.

Table 1. Patient and physician characteristics for Pilot participants in Study 1

|                                              | FOBT within 6 months<br>(n=2,503) | No FOBT within 6 months<br>(n=8,799) | Total<br>(n=11,302) |
|----------------------------------------------|-----------------------------------|--------------------------------------|---------------------|
| <b>Patients</b>                              |                                   |                                      |                     |
| Age group in years, No. (%)                  |                                   |                                      |                     |
| 50-59                                        | 1,279 (51%)                       | 5,384 (61%)                          | 6,663 (59%)         |
| 60-69                                        | 894 (36%)                         | 2,637 (30%)                          | 3,531 (31%)         |
| 70-74                                        | 330 (13%)                         | 778 (9%)                             | 1,108 (10%)         |
| Sex, No. (%)                                 |                                   |                                      |                     |
| Female                                       | 1,299 (52%)                       | 4,554 (52%)                          | 5,853 (52%)         |
| Male                                         | 1,204 (48%)                       | 4,245 (48%)                          | 5,449 (48%)         |
| Co-morbidity*, No. of ADGs (%)               |                                   |                                      |                     |
| 0                                            | 257 (10%)                         | 1,279 (15%)                          | 1,536 (14%)         |
| 1-2                                          | 828 (33%)                         | 3,044 (35%)                          | 3,872 (34%)         |
| 3-4                                          | 712 (28%)                         | 2,241 (25%)                          | 2,953 (26%)         |
| 5-6                                          | 393 (16%)                         | 1,224 (14%)                          | 1,617 (14%)         |
| 7+                                           | 313 (13%)                         | 1,011 (11%)                          | 1,324 (12%)         |
| Median neighborhood income quintile, No. (%) |                                   |                                      |                     |
| Rural                                        | 394 (16%)                         | 1,431 (16%)                          | 1,825 (16%)         |
| Low Urban                                    | 360 (14%)                         | 1,375 (16%)                          | 1,735 (15%)         |
| 2                                            | 402 (16%)                         | 1,418 (16%)                          | 1,820 (16%)         |
| 3                                            | 429 (17%)                         | 1,430 (16%)                          | 1,859 (16%)         |
| 4                                            | 432 (17%)                         | 1,552 (18%)                          | 1,984 (18%)         |
| High Urban                                   | 486 (19%)                         | 1,593 (18%)                          | 2,079 (18%)         |
| Health region, No. (%)                       |                                   |                                      |                     |
| Erie St.Clair                                | 125 (5%)                          | 337 (4%)                             | 462 (4%)            |
| South West                                   | 284 (11%)                         | 823 (9%)                             | 1,107 (10%)         |
| Waterloo Wellington                          | 76 (3%)                           | 251 (3%)                             | 327 (3%)            |
| Hamilton Niagara                             | 289 (12%)                         | 976 (11%)                            | 1,265 (11%)         |
| Central West                                 | 138 (6%)                          | 482 (5%)                             | 620 (5%)            |
| Mississauga Halton                           | 22 (1%)                           | 120 (1%)                             | 142 (1%)            |
| Toronto Central                              | 111 (4%)                          | 392 (4%)                             | 503 (4%)            |
| Central                                      | 24 (1%)                           | 177 (2%)                             | 201 (2%)            |
| Central East                                 | 361 (14%)                         | 1,282 (15%)                          | 1,643 (15%)         |
| South East                                   | 162 (6%)                          | 697 (8%)                             | 859 (8%)            |
| Champlain                                    | 219 (9%)                          | 676 (8%)                             | 895 (8%)            |
| North Simcoe-Muskoka                         | 77 (3%)                           | 188 (2%)                             | 265 (2%)            |
| North East                                   | 291 (12%)                         | 1,118 (13%)                          | 1,409 (12%)         |
| North West                                   | 324 (13%)                         | 1,280 (15%)                          | 1,604 (14%)         |



Tinmouth et al.

## Physician-linked mailed invitations for colorectal cancer screening

|                                                              |             |             |             |
|--------------------------------------------------------------|-------------|-------------|-------------|
| Recent immigrant, No. (%)                                    | 23 (1%)     | 88 (1%)     | 111 (1%)    |
| FOBT 2 to 5 years prior to mailing, No. (%)                  | 643 (26%)   | 905 (10%)   | 1,548 (14%) |
| <b>Physician</b>                                             |             |             |             |
| Median age in years (IQR)                                    | 52 (45-59)  | 53 (46-59)  | 52 (45-59)  |
| Sex, No. (%)                                                 |             |             |             |
| Female                                                       | 936 (37%)   | 3,044 (35%) | 3,980 (35%) |
| Male                                                         | 1,567 (63%) | 5,755 (65%) | 7,322 (65%) |
| Training location, No. (%)                                   |             |             |             |
| Outside Canada                                               | 312 (12%)   | 1,196 (14%) | 1,508 (13%) |
| In Canada                                                    | 2,191 (88%) | 7,603 (86%) | 9,794 (87%) |
| Practice type, No. (%)                                       |             |             |             |
| FHG                                                          | 1,082 (43%) | 4,266 (48%) | 5,348 (47%) |
| FHO/FHN                                                      | 432 (17%)   | 1,456 (17%) | 1,888 (17%) |
| FHO/FHN-FHT                                                  | 881 (35%)   | 2,620 (30%) | 3,501 (31%) |
| Other PEM                                                    | 108 (4%)    | 457 (5%)    | 565 (5%)    |
| Practice size (enrolled patients), No. (%)                   |             |             |             |
| >1800 patients                                               | 1,105 (44%) | 4,104 (47%) | 5,209 (46%) |
| Age-eligible rate of colonoscopy quintile, No. (%)           |             |             |             |
| Low                                                          | 485 (19%)   | 1,619 (18%) | 2,104 (19%) |
| 2                                                            | 548 (22%)   | 1,940 (22%) | 2,488 (22%) |
| 3                                                            | 637 (25%)   | 2,279 (26%) | 2,916 (26%) |
| 4                                                            | 477 (19%)   | 1,696 (19%) | 2,173 (19%) |
| High                                                         | 356 (14%)   | 1,265 (14%) | 1,621 (14%) |
| Age-eligible rate of FOBT quintile, No. (%)                  |             |             |             |
| Low                                                          | 487 (19%)   | 1,888 (21%) | 2,375 (21%) |
| 2                                                            | 504 (20%)   | 1,886 (21%) | 2,390 (21%) |
| 3                                                            | 533 (21%)   | 1,890 (21%) | 2,423 (21%) |
| 4                                                            | 522 (21%)   | 1,680 (19%) | 2,202 (19%) |
| High                                                         | 457 (18%)   | 1,455 (17%) | 1,912 (17%) |
| Age-eligible rate of annual physical exams quintile, No. (%) |             |             |             |
| Low                                                          | 496 (20%)   | 2,009 (23%) | 2,505 (22%) |
| 2                                                            | 490 (20%)   | 1,625 (18%) | 2,115 (19%) |
| 3                                                            | 472 (19%)   | 1,638 (19%) | 2,110 (19%) |
| 4                                                            | 509 (20%)   | 1,686 (19%) | 2,195 (19%) |
| High                                                         | 536 (21%)   | 1,841 (21%) | 2,377 (21%) |

## Physician-linked mailed invitations for colorectal cancer screening

|                                                          |           |             |             |
|----------------------------------------------------------|-----------|-------------|-------------|
| Age-eligible rate of influenza vaccine quintile, No. (%) |           |             |             |
| Low                                                      | 548 (22%) | 1,997 (23%) | 2,545 (23%) |
| 2                                                        | 549 (22%) | 1,765 (20%) | 2,314 (20%) |
| 3                                                        | 435 (17%) | 1,930 (22%) | 2,365 (21%) |
| 4                                                        | 485 (19%) | 1,770 (20%) | 2,255 (20%) |
| High                                                     | 486 (19%) | 1,337 (15%) | 1,823 (16%) |

\*Co-morbidity scored using number of Aggregated Diagnosis Groups (ADGs) using the Johns Hopkins Case Mix System

FHG = family health group

FHO/FHN = family health organizations or networks

Other PEM = other patient enrolled model of care

FOBT = fecal occult blood test

For peer review only

Tinmouth et al.

Physician-linked mailed invitations for colorectal cancer screening

Table 2. Multivariate logistic regression analysis using Generalized Estimating Equations for the characteristics of patients and physicians associated with completing an FOBT within 6 months of the mailing date.

| Patients                            | Odds ratio (95% C.I.) | P-value |
|-------------------------------------|-----------------------|---------|
| Age group, years                    |                       |         |
| 50-59                               | 0.6 (0.5, 0.8)        | <.0001  |
| 60-69                               | 0.8 (0.7, 1.0)        | NS      |
| 70-74                               | Reference             | N/A     |
| Sex                                 |                       |         |
| Female                              | 0.9 (0.9, 1.0)        | NS      |
| Male                                | Reference             | N/A     |
| Co-morbidity*, No. of ADGs          |                       |         |
| 0                                   | 0.7 (0.6, 0.8)        | 0.0002  |
| 1-2                                 | 0.9 (0.7, 1.0)        | NS      |
| 3-4                                 | 1.0 (0.9, 1.2)        | NS      |
| 5-6                                 | 1.0 (0.9, 1.2)        | NS      |
| 7+                                  | Reference             | N/A     |
| Median neighborhood income quintile |                       |         |
| Rural                               | 0.9 (0.7, 1.1)        | NS      |
| Low Urban                           | 0.9 (0.7, 1.0)        | NS      |
| 2                                   | 1.0 (0.8, 1.1)        | NS      |
| 3                                   | 1.0 (0.9, 1.1)        | NS      |
| 4                                   | 0.9 (0.8, 1.1)        | NS      |
| High Urban                          | Reference             | N/A     |
| Health region                       |                       |         |
| Erie St.Clair                       | 1.3 (0.9, 1.8)        | NS      |
| South West                          | 0.9 (0.6, 1.4)        | NS      |
| Waterloo Wellington                 | 0.8 (0.6, 1.2)        | NS      |
| Hamilton Niagara                    | 0.9 (0.6, 1.2)        | NS      |
| Central West                        | 1.0 (0.7, 1.4)        | NS      |
| Mississauga Halton                  | 0.6 (0.3, 1.2)        | NS      |
| Toronto Central                     | 0.8 (0.6, 1.2)        | NS      |
| Central                             | 0.5 (0.4, 0.7)        | 0.0004  |
| South East                          | 0.8 (0.4, 0.7)        | NS      |
| Champlain                           | 1.0 (0.7, 1.4)        | NS      |
| North Simcoe-Muskoka                | 0.9 (0.6, 1.4)        | NS      |
| North East                          | 1.1 (0.7, 1.5)        | NS      |
| North West                          | 0.7 (0.5, 1.0)        | 0.03    |
| Central East                        | Reference             | N/A     |
| Recency of immigration              |                       |         |
| Remote or non-immigrant             | 1.0 (0.6, 1.6)        | NS      |
| Recent immigrant                    | Reference             | N/A     |
| Prior FOBT Use                      |                       |         |
| 2 to 5 years prior to mailing       | 2.8 (2.5, 3.3)        | <.0001  |

|                                                     |                |      |
|-----------------------------------------------------|----------------|------|
| > 5 years or never                                  | Reference      |      |
| <b>Physician</b>                                    |                |      |
| Increasing age (per year)                           | 1.0 (1.0, 1.0) | NS   |
| Sex                                                 |                |      |
| Female                                              | 1.3 (1.0, 1.5) | 0.02 |
| Male                                                | Reference      | N/A  |
| Training location                                   |                |      |
| In Canada                                           | 0.9 (0.7, 1.2) | NS   |
| Outside Canada                                      | Reference      | N/A  |
| Practice type                                       |                |      |
| FHG                                                 | 0.9 (0.7, 1.1) | NS   |
| FHO/FHN                                             | 0.8 (0.6, 1.1) | NS   |
| Other PEM                                           | 0.7 (0.4, 1.0) | 0.05 |
| FHO/FHN-FHT                                         | Reference      | N/A  |
| Practice size (enrolled patients)                   |                |      |
| ≤ 1800 patients                                     | 1.1 (0.9, 1.3) | NS   |
| > 1800 patients                                     | Reference      | N/A  |
| Age-eligible rate of colonoscopy quintile           |                |      |
| Low                                                 | 1.1 (0.8, 1.5) | NS   |
| 2                                                   | 1.2 (1.0, 1.6) | NS   |
| 3                                                   | 1.0 (0.8, 1.2) | NS   |
| 4                                                   | 1.0 (0.8, 1.3) | NS   |
| High                                                | Reference      | N/A  |
| Age-eligible rate of FOBT quintile                  |                |      |
| 2                                                   | 0.9 (0.6, 1.3) | NS   |
| 3                                                   | 0.9 (0.7, 1.2) | NS   |
| 4                                                   | 1.1 (0.8, 1.4) | NS   |
| High                                                | 0.9 (0.7, 1.3) | NS   |
| Low                                                 | Reference      | N/A  |
| Age-eligible rate of annual physical exams quintile |                |      |
| 2                                                   | 1.4 (0.9, 2.0) | NS   |
| 3                                                   | 1.3 (0.9, 1.8) | NS   |
| 4                                                   | 1.3 (0.9, 1.8) | NS   |
| High                                                | 1.1 (0.8, 1.5) | NS   |
| Low                                                 | Reference      | N/A  |
| Age-eligible rate of influenza vaccine quintile     |                |      |
| 2                                                   | 1.0 (0.8, 1.2) | NS   |
| 3                                                   | 0.8 (0.6, 1.0) | 0.02 |
| 4                                                   | 0.9 (0.7, 1.2) | NS   |
| High                                                | 1.3 (1.0, 1.7) | NS   |
| Low                                                 | Reference      | N/A  |

\*Co-morbidity scored using number of Aggregated Diagnosis Groups (ADGs) using the Johns Hopkins Case Mix System

FHG = family health group

FHO/FHN = family health organizations or networks

Tinmouth et al.

Physician-linked mailed invitations for colorectal cancer screening

1  
2  
3  
4 Other PEM = other patient enrolled model of care

5 NS = not significant

6 N/A - not applicable

7 FOBT = fecal occult blood test  
8  
9  
10  
11  
12  
13  
14  
15  
16  
17  
18  
19  
20  
21  
22  
23  
24  
25  
26  
27  
28  
29  
30  
31  
32  
33  
34  
35  
36  
37  
38  
39  
40  
41  
42  
43  
44  
45  
46  
47  
48  
49  
50  
51  
52  
53  
54  
55  
56  
57  
58  
59  
60

For peer review only

Table 3. Characteristics of the 2 cohorts matched by propensity score in Study 2

|                                                 | Pilot participants<br>(n=10,652) | Control patients<br>(n=10,652) | Standardized<br>Difference* |
|-------------------------------------------------|----------------------------------|--------------------------------|-----------------------------|
| <b>Patients</b>                                 |                                  |                                |                             |
| Age group in years, No. (%)                     |                                  |                                |                             |
| 50-59                                           | 6,248 (59%)                      | 6,324 (59%)                    | 0.01                        |
| 60-69                                           | 3,342 (31%)                      | 3,316 (31%)                    | 0.01                        |
| 70-74                                           | 1,062 (10%)                      | 1,012 (10%)                    | 0.02                        |
| Sex, No. (%)                                    |                                  |                                |                             |
| Female                                          | 5,548 (52%)                      | 5,477 (51%)                    | 0.01                        |
| Male                                            | 5,104 (48%)                      | 5,175 (49%)                    | 0.01                        |
| Co-morbidity**, No. of ADGs (%)                 |                                  |                                |                             |
| 0                                               | 1,462 (14%)                      | 1,425 (13%)                    | 0.01                        |
| 1-2                                             | 3,647 (34%)                      | 3,716 (35%)                    | 0.01                        |
| 3-4                                             | 2,764 (26%)                      | 2,835 (27%)                    | 0.02                        |
| 5-6                                             | 1,536 (14%)                      | 1,473 (14%)                    | 0.02                        |
| 7+                                              | 1,243 (12%)                      | 1,203 (11%)                    | 0.01                        |
| Median neighborhood income quintile,<br>No. (%) |                                  |                                |                             |
| Rural                                           | 1,825 (17%)                      | 1,889 (18%)                    | 0.02                        |
| Low Urban                                       | 1,628 (15%)                      | 1,699 (16%)                    | 0.02                        |
| 2                                               | 1,698 (16%)                      | 1,728 (16%)                    | 0.01                        |
| 3                                               | 1,728 (16%)                      | 1,681 (16%)                    | 0.01                        |
| 4                                               | 1,831 (17%)                      | 1,753 (16%)                    | 0.02                        |
| High Urban                                      | 1,942 (18%)                      | 1,902 (18%)                    | 0.01                        |
| Health region, No. (%)                          |                                  |                                |                             |
| Erie St.Clair                                   | 462 (4%)                         | 423 (4%)                       | 0.02                        |
| South West                                      | 1,107 (10%)                      | 1,114 (10%)                    | 0                           |
| Waterloo Wellington                             | 327 (3%)                         | 343 (3%)                       | 0.01                        |
| Hamilton Niagara                                | 1,265 (12%)                      | 1,290 (12%)                    | 0.01                        |
| Central West                                    | 620 (6%)                         | 580 (5%)                       | 0.02                        |
| Mississauga Halton                              | 142 (1%)                         | 144 (1%)                       | 0                           |
| Toronto Central                                 | 503 (5%)                         | 478 (4%)                       | 0.01                        |
| Central                                         | 201 (2%)                         | 209 (2%)                       | 0.01                        |
| Central East                                    | 1,643 (15%)                      | 1,702 (16%)                    | 0.02                        |
| South East                                      | 859 (8%)                         | 891 (8%)                       | 0.01                        |
| Champlain                                       | 895 (8%)                         | 904 (8%)                       | 0                           |
| North Simcoe-Muskoka                            | 265 (2%)                         | 242 (2%)                       | 0.01                        |
| North East                                      | 1,409 (13%)                      | 1,378 (13%)                    | 0.01                        |
| North West                                      | 954 (9%)                         | 954 (9%)                       | 0                           |
| Recent immigrant, No. (%)                       | 111 (1%)                         | 105 (1%)                       | 0.01                        |
| FOBT 2 to 5 years prior to mailing, No.<br>(%)  | 1,476 (14%)                      | 1,240 (12%)                    | 0.07                        |
| <b>Physician</b>                                |                                  |                                |                             |

Tinmouth et al.

## Physician-linked mailed invitations for colorectal cancer screening

|                                            |             |             |     |
|--------------------------------------------|-------------|-------------|-----|
| Median age in years (IQR)                  | 52 (45-59)  | 52 (47-58)  | N/A |
| Sex, No. (%)                               |             |             |     |
| Female                                     | 3,875 (36%) | 3,335 (31%) | N/A |
| Male                                       | 6,777 (64%) | 7,317 (69%) |     |
| Practice type, No. (%)                     |             |             |     |
| FHG                                        | 4,854 (46%) | 4,885 (46%) | N/A |
| FHO/FHN                                    | 1,859 (17%) | 1,718 (16%) |     |
| FHO/FHN-FHT                                | 3,374 (32%) | 3,027 (28%) |     |
| Other PEM                                  | 565 (5%)    | 1,022 (10%) |     |
| Practice size (enrolled patients), No. (%) |             |             |     |
| >1800 patients                             | 5,366 (50%) | 5,026 (47%) | N/A |

\*Standardized differences for physician level variables not reported as propensity scores were estimated using patient level characteristics only

\*\*Co-morbidity scored using number of Aggregated Diagnosis Groups (ADGs) using the Johns Hopkins Case Mix System

FHG = family health group

FHO/FHN = family health organizations or networks

Other PEM = other patient enrolled model of care

FOBT = fecal occult blood test

Table 4. Association between mailed invitation and FOBT completion or mailed invitation and FOBT or colonoscopy completion after adjusting for physician factors.

|                                   | FOBT completion       |         | FOBT or Colonoscopy completion |         |
|-----------------------------------|-----------------------|---------|--------------------------------|---------|
|                                   | Odds ratio (95% C.I.) | P-value | Odds ratio (95% C.I.)          | P-value |
| Mailed invitation                 |                       |         |                                |         |
| Yes (Pilot)                       | 3.3 (3.1, 3.6)        | <.0001  | 2.7 (2.5, 2.9)                 | <.0001  |
| No (Controls)                     | Reference             | N/A     | Reference                      | N/A     |
| Increasing age (per year)         | 1.0 ( 1.0, 1.0)       | NS      | 1.0 (1.0, 1.0)                 | 0.03    |
| Sex, No. (%)                      |                       |         |                                |         |
| Female                            | 1.0 (0.9, 1.1)        | NS      | 1.0 (0.9, 1.1)                 | NS      |
| Male                              | Reference             | N/A     | Reference                      | N/A     |
| Practice type, No. (%)            |                       |         |                                |         |
| FHG                               | 0.7 (0.6, 0.8)        | <.0001  | 0.7 (0.7, 0.8)                 | <.0001  |
| FHO/FHN                           | 0.8 (0.7, 0.9)        | <.0001  | 0.8 (0.7, 0.9)                 | <.0001  |
| Other PEM                         | 0.8 (0.7, 1.0)        | 0.03    | 0.8 (0.7, 1.0)                 | NS      |
| FHO/FHN-FHT                       | Reference             | N/A     | Reference                      | N/A     |
| Practice size (enrolled patients) |                       |         |                                |         |
| ≤ 1800 patients                   | 1.2 (1.1, 1.3)        | 0.0004  | 1.2 (1.1, 1.3)                 | <.0001  |
| > 1800 patients                   | Reference             | N/A     | Reference                      | N/A     |

FHG = family health group

FHO/FHN = family health organizations or networks

Other PEM = other patient enrolled model of care

FOBT = fecal occult blood test



1  
2  
3  
4  
5  
6  
7  
8  
9  
10  
11  
12  
13  
14  
15  
16  
17  
18  
19  
20  
21  
22  
23  
24  
25  
26  
27  
28  
29  
30  
31  
32  
33  
34  
35  
36  
37  
38  
39  
40  
41  
42  
43  
44  
45  
46  
47  
48  
49  
50  
51  
52  
53  
54  
55  
56  
57  
58  
59  
60

Figure Legends

Figure 1. Mock-up of physician-linked invitation used in the Pilot.

For peer review only

From the office of Dr. George Black

June 1, 2009

Lawren Harris  
456 Superior Street  
Lindsay ON K2L 3M4

Dear Lawren Harris:

**You have received this letter because it is time to be screened for colon cancer.** Our records as of April 1<sup>st</sup>, 2009 show that you have never had a fecal occult blood test (FOBT) or we do not know when you had your last FOBT. All adults between the ages of 50 and 74 years who are at average risk for colon cancer should do a FOBT every two years.

If your parent, brother, sister or child has had colon cancer, your risk is higher and you should have a colonoscopy.

**Please call my office to set up an appointment to talk about your risk for colon cancer and which test is right for you.**

If you have recently completed colon cancer screening, please disregard this letter.

I look forward to hearing from you soon.

**Dr. George Black**  
705-555-1212

### GET THE FACTS. GET CHECKED.

- Colon cancer is the second most common cause of cancer death in Ontario
- Colon cancer can develop without any early warning signs.
- If it is caught early enough, 9 out of every 10 people can be cured.
- Regular screening is the best way to catch colon cancer early.
- The FOBT is a simple test that can be done at home.

For more information please visit [www.coloncancercheck.ca](http://www.coloncancercheck.ca)

This letter has been sent on my behalf by ColonCancerCheck (CCC), Ontario's colorectal cancer screening program. CCC is a collaborative initiative of the Ministry of Health and Long-Term Care and Cancer Care Ontario. If for any reason you do not wish to receive future correspondence from the program, simply call the ColonCancerCheck Information Line at 1-866-662-9233 during business hours.

Tinmouth et al., Physician-linked mailed invitation to be screened improves uptake in an organized colorectal cancer screening program.

|                              | Item No | Recommendation                                                                                                                                                                                                                                                                                                                                                                                                                                                                                                                                                                                                                                                                                           | Page                                                                                                                  | Comment |
|------------------------------|---------|----------------------------------------------------------------------------------------------------------------------------------------------------------------------------------------------------------------------------------------------------------------------------------------------------------------------------------------------------------------------------------------------------------------------------------------------------------------------------------------------------------------------------------------------------------------------------------------------------------------------------------------------------------------------------------------------------------|-----------------------------------------------------------------------------------------------------------------------|---------|
| <b>Title and abstract</b>    | 1       | (a) Indicate the study's design with a commonly used term in the title or the abstract<br>(b) Provide in the abstract an informative and balanced summary of what was done and what was found                                                                                                                                                                                                                                                                                                                                                                                                                                                                                                            | 1, 3                                                                                                                  |         |
| <b>Introduction</b>          |         |                                                                                                                                                                                                                                                                                                                                                                                                                                                                                                                                                                                                                                                                                                          |                                                                                                                       |         |
| Background/ratio             | 2       | Explain the scientific background and rationale for the investigation being reported                                                                                                                                                                                                                                                                                                                                                                                                                                                                                                                                                                                                                     | 07-Jun                                                                                                                |         |
| Objectives                   | 3       | State specific objectives, including any prespecified hypotheses                                                                                                                                                                                                                                                                                                                                                                                                                                                                                                                                                                                                                                         | 7, first paragraph                                                                                                    |         |
| <b>Methods</b>               |         |                                                                                                                                                                                                                                                                                                                                                                                                                                                                                                                                                                                                                                                                                                          |                                                                                                                       |         |
| Study design                 | 4       | Present key elements of study design early in the paper                                                                                                                                                                                                                                                                                                                                                                                                                                                                                                                                                                                                                                                  | 7, paragraph 2                                                                                                        |         |
| Setting                      | 5       | Describe the setting, locations, and relevant dates, including periods of recruitment, exposure, follow-up, and data collection                                                                                                                                                                                                                                                                                                                                                                                                                                                                                                                                                                          | 7, paragraph 2                                                                                                        |         |
| Participants                 | 6       | (a) <i>Cohort study</i> —Give the eligibility criteria, and the sources and methods of selection of participants. Describe methods of follow-up<br><br><i>Case-control study</i> —Give the eligibility criteria, and the sources and methods of case ascertainment and control selection. Give the rationale for the choice of cases and controls<br><br><i>Cross-sectional study</i> —Give the eligibility criteria, and the sources and methods of selection of participants<br>(b) <i>Cohort study</i> —For matched studies, give matching criteria and number of exposed and unexposed<br><i>Case-control study</i> —For matched studies, give matching criteria and the number of controls per case | 9, paragraph 2,<br>10, paragraph 2<br>& 12, first<br>paragraph<br><br>n/a<br><br>n/a<br>12, first<br>paragraph<br>n/a |         |
| Variables                    | 7       | Clearly define all outcomes, exposures, predictors, potential confounders, and effect modifiers. Give diagnostic criteria, if applicable                                                                                                                                                                                                                                                                                                                                                                                                                                                                                                                                                                 | 9, 10 & 11                                                                                                            |         |
| Data sources/<br>measurement | 8*      | For each variable of interest, give sources of data and details of methods of assessment (measurement). Describe comparability of assessment methods if there is more than one group                                                                                                                                                                                                                                                                                                                                                                                                                                                                                                                     | 8, 9, 10 & 11                                                                                                         |         |
| Bias                         | 9       | Describe any efforts to address potential sources of bias                                                                                                                                                                                                                                                                                                                                                                                                                                                                                                                                                                                                                                                | 11, paragraph 2<br>& 13, paragraph                                                                                    |         |
| Study size                   | 10      | Explain how the study size was arrived at                                                                                                                                                                                                                                                                                                                                                                                                                                                                                                                                                                                                                                                                | 5, paragraph 1                                                                                                        |         |
| Quantitative<br>variables    | 11      | Explain how quantitative variables were handled in the analyses. If applicable, describe which groupings were chosen and why                                                                                                                                                                                                                                                                                                                                                                                                                                                                                                                                                                             |                                                                                                                       |         |
| Statistical<br>methods       | 12      | (a) Describe all statistical methods, including those used to control for confounding<br>(b) Describe any methods used to examine subgroups and interactions<br>(c) Explain how missing data were addressed<br><br>(d) <i>Cohort study</i> —If applicable, explain how loss to follow-up was addressed<br><br><i>Case-control study</i> —If applicable, explain how matching of cases and controls was addressed<br><i>Cross-sectional study</i> —If applicable, describe analytical methods taking account of sampling strategy<br>(e) Describe any sensitivity analyses                                                                                                                                | 11, paragraph 2<br>& 13, paragraph<br>n/a<br><br>14, first<br>paragraph<br><br>n/a<br><br>n/a<br>n/a                  |         |
| <b>Results</b>               |         |                                                                                                                                                                                                                                                                                                                                                                                                                                                                                                                                                                                                                                                                                                          |                                                                                                                       |         |
| Participants                 | 13*     | (a) Report numbers of individuals at each stage of study—eg numbers potentially eligible, examined for eligibility, confirmed eligible, included in the study, completing follow-up, and analysed<br><br>(b) Give reasons for non-participation at each stage                                                                                                                                                                                                                                                                                                                                                                                                                                            | 14, first & last<br>paragraphs<br><br>14, first & last<br>paragraphs                                                  |         |

all patients followed through administrative data, therefore no loss to f/u

|                          |     |                                                                                                                                                                                                              |                                       |
|--------------------------|-----|--------------------------------------------------------------------------------------------------------------------------------------------------------------------------------------------------------------|---------------------------------------|
|                          |     | (c) Consider use of a flow diagram                                                                                                                                                                           | n/a                                   |
| Descriptive data         | 14* | (a) Give characteristics of study participants (eg demographic, clinical, social) and information on exposures and potential confounders                                                                     | Table 1 & Table 3                     |
|                          |     | (b) Indicate number of participants with missing data for each variable of interest                                                                                                                          | 15, first paragraph                   |
|                          |     | (c) <i>Cohort study</i> —Summarise follow-up time (eg, average and total amount)                                                                                                                             | all followed up for 6 months          |
| Outcome data             | 15* | <i>Cohort study</i> —Report numbers of outcome events or summary measures over time                                                                                                                          | 15, 2nd paragraph & 16, 1st paragraph |
|                          |     | <i>Case-control study</i> — Report numbers in each exposure category, or summary measures of exposure                                                                                                        | n/a                                   |
|                          |     | <i>Cross-sectional study</i> —Report numbers of outcome events or summary measures                                                                                                                           | n/a                                   |
| Main results             | 16  | (a) Give unadjusted estimates and, if applicable, confounder-adjusted estimates and their precision (eg, 95% confidence interval). Make clear which confounders were adjusted for and why they were included | 15, 2nd paragraph, Tables 2 & 4       |
|                          |     | (b) Report category boundaries when continuous variables were categorized                                                                                                                                    | Tables 2 & 4                          |
|                          |     | (c) If relevant, consider translating estimates of relative risk into absolute risk for a meaningful time period                                                                                             | n/a                                   |
| Other analyses           | 17  | Report other analyses done—eg analyses of subgroups and interactions, and sensitivity analyses                                                                                                               | n/a                                   |
| <b>Discussion</b>        |     |                                                                                                                                                                                                              |                                       |
| Key results              | 18  | Summarise key results with reference to study objectives                                                                                                                                                     | 16, paragraph 1                       |
| Limitations              | 19  | Discuss limitations of the study, taking into account sources of potential bias or imprecision. Discuss both direction and magnitude of any potential bias                                                   | 18, 2nd paragraph                     |
| Interpretation           | 20  | Give a cautious overall interpretation of results considering objectives, limitations, multiplicity of analyses, results from similar studies, and other relevant evidence                                   | 17 & 18                               |
| Generalisability         | 21  | Discuss the generalisability (external validity) of the study results                                                                                                                                        | 18, last paragraph                    |
| <b>Other information</b> |     |                                                                                                                                                                                                              |                                       |
| Funding                  | 22  | Give the source of funding and the role of the funders for the present study and, if applicable, for the original study on which the present article is based                                                | 19, 20                                |



**Physician-linked mailed invitations to be screened in an organized colorectal cancer screening program: effectiveness and factors associated with response.**

|                                 |                                                                                                                                                                                                                                                                                                                                                       |
|---------------------------------|-------------------------------------------------------------------------------------------------------------------------------------------------------------------------------------------------------------------------------------------------------------------------------------------------------------------------------------------------------|
| Journal:                        | <i>BMJ Open</i>                                                                                                                                                                                                                                                                                                                                       |
| Manuscript ID:                  | bmjopen-2013-004494.R1                                                                                                                                                                                                                                                                                                                                |
| Article Type:                   | Research                                                                                                                                                                                                                                                                                                                                              |
| Date Submitted by the Author:   | 27-Dec-2013                                                                                                                                                                                                                                                                                                                                           |
| Complete List of Authors:       | Tinmouth, Jill; Sunnybrook Health Sciences Centre, Baxter, Nancy; University of Toronto, St Michaels Hospital, Surgery Paszat, Lawrence; Institute for Clinical Evaluative Sciences, Rabeneck, Linda; University of Toronto, Sutradhar, Rinku; Institute for Clinical Evaluative Sciences, Yun, Lingsong; Institute for Clinical Evaluative Sciences, |
| <b>Primary Subject Heading</b>: | Gastroenterology and hepatology                                                                                                                                                                                                                                                                                                                       |
| Secondary Subject Heading:      | Oncology, Public health, General practice / Family practice, Health services research                                                                                                                                                                                                                                                                 |
| Keywords:                       | Gastrointestinal tumours < GASTROENTEROLOGY, PREVENTIVE MEDICINE, PRIMARY CARE, PUBLIC HEALTH                                                                                                                                                                                                                                                         |
|                                 |                                                                                                                                                                                                                                                                                                                                                       |

SCHOLARONE™  
Manuscripts

Only

**TITLE PAGE**

**Title:** Physician-linked mailed invitations to be screened in an organized colorectal cancer screening program: effectiveness and factors associated with response..

**Short title:** Physician-linked invitations for colorectal cancer screening

**Authors:**

Jill Tinmouth<sup>1,3,5,6</sup>

Nancy N. Baxter<sup>3,5,7</sup>

Lawrence F. Paszat<sup>2,3,4</sup>

Linda Rabeneck<sup>1,3,4,5,6</sup>

Rinku Sutradhar<sup>3,4</sup>

Lingsong Yun<sup>3</sup>

**Affiliations:** Departments of Medicine<sup>1</sup> and Radiation Oncology<sup>2</sup>, Sunnybrook Health Sciences Centre, Toronto, Canada; Institute for Clinical Evaluative Sciences, Toronto, Canada<sup>3</sup>; Dalla Lana School of Public Health, University of Toronto, Toronto, Canada<sup>4</sup>; Institute of Health Policy Management and Evaluation, University of Toronto, Toronto, Canada<sup>5</sup>; Cancer Care Ontario, Toronto, Canada<sup>6</sup>; Department of General Surgery and Li Ka Shing Knowledge Institute, St. Michael's Hospital, Toronto, Canada<sup>7</sup>.

**Corresponding Author Information:**

Jill Tinmouth MD PhD FRCPC

Sunnybrook Health Sciences Centre

2075 Bayview Ave Rm HG40

Toronto ON M4N 3M5

416 480-5910 t

416 480-4845 f

[jill.tinmouth@sunnybrook.ca](mailto:jill.tinmouth@sunnybrook.ca)

**Email addresses of authors:**

Nancy N. Baxter [BaxterN@smh.toronto.on.ca](mailto:BaxterN@smh.toronto.on.ca)

Lawrence F. Paszat [lawrence.paszat@ices.on.ca](mailto:lawrence.paszat@ices.on.ca)

Linda Rabeneck [Linda.Rabeneck@cancercare.on.ca](mailto:Linda.Rabeneck@cancercare.on.ca)

Rinku Sutradhar [Rinku.Sutradhar@ices.on.ca](mailto:Rinku.Sutradhar@ices.on.ca)

Lingsong Yun [Lingsong.Yun@ices.on.ca](mailto:Lingsong.Yun@ices.on.ca)

**Word count:** 3211 (main text), 262 (abstract)

**Number of Tables:** 4

Tinmouth et al.

Physician-linked mailed invitations for colorectal cancer screening

1  
2  
3  
4  
5  
6  
7  
8  
9  
10  
11  
12  
13  
14  
15  
16  
17  
18  
19  
20  
21  
22  
23  
24  
25  
26  
27  
28  
29  
30  
31  
32  
33  
34  
35  
36  
37  
38  
39  
40  
41  
42  
43  
44  
45  
46  
47  
48  
49  
50  
51  
52  
53  
54  
55  
56  
57  
58  
59  
60

**Number of Figures:** 1

**Number of References:** 40

**Key words:** Mailed invitations, colorectal cancer, organized screening

For peer review only

**ABSTRACT**

Objectives: A central tenet of organized cancer screening is that all persons in a target population are invited. The aims of this study were to identify participant and physician factors associated with response to mailed physician-linked invitations (Study 1) and to evaluate their effectiveness in an organized colorectal (CRC) screening program (Study 2).

Design and setting: Two studies (Study 1 – cohort design and Study 2 – matched cohort design of Study 1 participants and a matched control group) conducted in context of Ontario's organized province-wide CRC screening program.

Participants: 102 family physicians and 11,302 associated eligible patients from a technical evaluation ("the Pilot") of large scale mailed invitations for CRC screening were included. Matched controls were randomly selected using propensity scores from among eligible patients associated with family physicians in similar practice types as the Pilot physicians.

Intervention: Physician-linked mailed invitation to have CRC screening.

Outcomes: Uptake of fecal occult blood test (FOBT) within 6 months of mailed invitation (primary) and uptake of FOBT or colonoscopy within 6 months of mailed invitation (secondary).

Results: Factors significantly associated with uptake of FOBT included prior FOBT use, older participant age, greater participant co-morbidity and having a female physician. In



Tinmouth et al.

Physician-linked mailed invitations for colorectal cancer screening

1  
2  
3  
4 the matched analysis, Pilot participants were more likely to complete an FOBT (22% vs.  
5  
6 8%,  $p < 0.0001$ ) or an FOBT or colonoscopy (25% vs. 11%,  $p < 0.0001$ ) within 6 months of  
7  
8 mailed invitation than matched controls. The number needed to invite to screen one  
9  
10 additional person was 7.  
11

12  
13  
14 Conclusions: Centralized large scale mailing of physician-linked invitations is both  
15  
16 feasible and effective in an organized CRC screening program.  
17  
18  
19  
20  
21  
22  
23  
24  
25  
26  
27  
28  
29  
30  
31  
32  
33  
34  
35  
36  
37  
38  
39  
40  
41  
42  
43  
44  
45  
46  
47  
48  
49  
50  
51  
52  
53  
54  
55  
56  
57  
58  
59  
60

**ARTICLE SUMMARY**

Strengths and limitations of this study:

- We describe the implementation of physician-linked invitations in an organized colorectal screening program that is characterized by a high level of primary care physician involvement and that operates in a context where opportunistic screening with colonoscopy is possible
- We have shown that centralized large scale mailing of physician-linked invitations is feasible and effective in this context
- We found that physician linked mailed invitations improve CRC screening participation by 14% such that 7 physician-linked invitations need to be mailed to screen one additional person
- We were limited to data found in Ontario health administrative databases; for example, we were not able to determine family history
- Findings are promising but require appropriate infrastructure in order to be implemented in other jurisdictions

## INTRODUCTION

Colorectal cancer (CRC) is the 3<sup>rd</sup> most common cancer and the 4<sup>th</sup> leading cause of cancer-related death worldwide.[1] Fecal occult blood testing (FOBT)[2-4] and flexible sigmoidoscopy[5-7] have been shown to decrease CRC mortality in randomized controlled trials.

Given these data, organized CRC screening programs[8] are being implemented worldwide.[9] On April 1 2008, Ontario launched Canada's first organized province-wide CRC screening program, ColonCancerCheck (CCC).[10] CCC has a dual strategy: through the primary care physician, FOBT is offered to people at average risk for CRC and colonoscopy to those at increased risk based on family history. The CCC program uses a non-rehydrated guaiac FOBT (Hema-Screen, Immunostics, Inc., NJ, USA) requiring 3 stool samples from separate stools. The only recommended dietary restriction is to avoid vitamin C for 3 days prior to and during the collection period.

Approximately 75% of Ontario residents received their care via a patient enrolled model (PEMs) of care at the time of the study (2009).[11] PEMs comprise teams of family physicians who provide their enrolled patients with comprehensive health care and extended hours.[12] PEMs vary in terms of structure, services provided and remuneration (varying from enhance fee-for-service to blended capitation). All Ontario physicians are remunerated for preventive care such as CRC screening however, PEM

1  
2  
3  
4 physicians are incented to a greater degree than those who are not in PEMs.  
5  
6 Specifically, PEM physicians receive a \$7/patient fee for FOBT Distribution and  
7  
8 Counseling, a \$6.86/patient fee for CRC Screening Management and an annual  
9  
10 Colorectal Cancer Screening Preventive Care Bonus (\$220 to \$4000) depending on the  
11  
12 proportion of enrolled patients who are up-to-date with FOBT (15-70%). The physician  
13  
14 is entitled to the CRC Screening Management fee if the enrolled patient attends an  
15  
16 appointment to discuss CRC screening, has declined the test verbally or in writing or  
17  
18 there has been no response after 2 written notices and a telephone call from the  
19  
20 physician.[13]  
21  
22  
23  
24  
25  
26  
27

28 A central tenet of organized screening programs is that all persons in the target  
29  
30 population be invited to participate.[8] Implementation of this aspect of organized  
31  
32 screening vary: invitations may be sent with an FOBT kit, can include physician  
33  
34 recommendation or may incorporate tailored messaging.[14 , 15] Some of these  
35  
36 approaches, such as incorporation of physician recommendation, present significant  
37  
38 implementation challenges for organized screening programs such as Ontario's.  
39  
40 In 2009, the CCC program conducted the CCC Invitation Pilot (the "Pilot"), an evaluation  
41  
42 that tested the technical feasibility of a centralized approach to sending physician-linked  
43  
44 mailed invitations for CRC screening. In this paper, we describe the structure and the  
45  
46 implementation of the Pilot. In addition, we report on participant and physician factors  
47  
48  
49  
50  
51  
52  
53  
54  
55  
56  
57  
58  
59  
60

1  
2  
3  
4 associated with response to mailed physician-linked invitations and on the effectiveness  
5  
6 of these invitations in an organized CRC screening program.  
7  
8  
9

## 10 11 12 **METHODS**

### 13 14 15 **The CCC Invitation Pilot – Implementation and Evaluation**

16  
17 The Pilot was conducted by CCC in November 2009 in order to develop and test the  
18  
19 technical infrastructure required for large scale centralized physician-linked mailed  
20  
21 invitations in Ontario. For the Pilot, invitation letters were generated by the CCC  
22  
23 program on behalf of 102 family physicians and sent to all their eligible enrolled patients.  
24  
25 Just over 11,000 eligible patient participants were sent mailed invitations requesting they  
26  
27 visit their family physician to obtain an FOBT kit or, if appropriate based on family  
28  
29 history, a referral for colonoscopy. In this paper, we report on 2 studies using this cohort.  
30  
31 Study 1 examines participant and physician factors associated with response to the  
32  
33 mailed invitation among those who were sent the mailed invitation. Study 2 evaluates  
34  
35 the effectiveness of the mailed invitation by comparing uptake of CRC screening among  
36  
37 Study 1 participants compared to a matched control group. Ethics approval was  
38  
39 obtained from the research ethics boards at Sunnybrook Health Sciences Centre and  
40  
41 the Institute for Clinical Evaluative Sciences (ICES) and permission to use the Pilot data  
42  
43 was obtained from Cancer Care Ontario's (CCO) Data Access Committee. All analyses  
44  
45  
46  
47  
48  
49  
50  
51  
52  
53  
54  
55  
56  
57  
58  
59  
60

1  
2  
3  
4 were conducted using SAS v.9 (SAS Institute, Cary, NC). A p-value of 0.05 was used to  
5  
6  
7 determine statistical significance.  
8  
9

## 10 11 **Data Sources**

12  
13  
14 The Pilot study was conducted at ICES, which houses the administrative health records  
15  
16 for all 12.4 million Ontarians. CCC program databases were linked to the ICES  
17  
18 administrative databases using an encrypted version of the provincial health insurance  
19  
20 number.  
21  
22  
23  
24

25  
26 The ICES databases used include the Canadian Institute of Health Information (CIHI)  
27  
28 databases, the Ontario Health Insurance Program (OHIP) Claims History Database, the  
29  
30 Registered Persons Database (RPDB), the Ontario Cancer Registry, the ICES Physician  
31  
32 Database, and the Client Agency Program Enrollment (CAPE) registry. The CIHI, OHIP,  
33  
34 RPDB and the Ontario Cancer Registry and the ICES Physician Database have been  
35  
36 previously described.[16 ,17] The CAPE registry tracks patients enrolled to physicians  
37  
38 who participate in PEMs and is a centralized electronic record of the linkage between  
39  
40 specific patients and their physicians.,  
41  
42  
43  
44  
45

46  
47 The CCC program has collected data on CRC screening since its inception using  
48  
49 Laboratory Reporting Tool (LRT) and comprises data related to the FOBT kits  
50  
51 administered by the CCC program, including the results of these tests.  
52  
53  
54  
55  
56  
57  
58  
59  
60

## Study 1: Factors associated with response to the mailed invitation

Cohort Definition: For the Pilot, a convenience sample of physicians participating in PEM-type practices was recruited via CCO's Provincial Primary Care Cancer Network. Patients enrolled to these physicians, aged 50 to 74 years without a history of CRC and who were due for CRC screening (without a record of recent FOBT (previous two years) or lower GI investigation including flexible sigmoidoscopy and colonoscopy (previous 5 years)), were eligible. For the Pilot mailing, CCC generated lists of patient participants eligible for CRC screening for each participating physician using CAPE, Ontario Cancer Registry, OHIP, CIRT and LRT. All persons who were sent an invitation were included in the cohort, regardless of whether the letter was returned to the sender.

The Mailing: Invitations were mailed in November 2009. The date of mailing was the index date. The letters were compiled centrally by the CCC program but were physician-linked; patient participants were sent a letter from their own physician, as indicated by their name at the bottom of the letter in an italicized font (Figure 1). The letter asked participants to visit their family physician for screening; it did not include an FOBT kit. The letter was accompanied by a CRC screening information brochure and sent in an envelope with the family physician name in the front upper left corner. For the purposes of the study, Pilot physicians were compensated an equivalent amount to the CRC Screening Management fee (\$6.86 per eligible enrolled patient) as Ontario PEM

1  
2  
3  
4 physicians are eligible for this fee for contacting the patient by mail regarding CRC  
5  
6 screening.  
7  
8  
9

10  
11 Response to Mailed Invitation: We used a broad definition of response to the mailed  
12 invitation: any record of FOBT in either OHIP or in LRT within 6 months of the index  
13 date, regardless of result (including rejected kits). Up to 10% of FOBT done in the  
14 province are captured only through OHIP, which does not have data on test results. We  
15 were not able to measure response in persons at increased risk of CRC as we do not  
16 have family history data available in the administrative databases.  
17  
18  
19  
20  
21  
22  
23  
24  
25  
26  
27

28 Participant and Physician Factors: We characterized participants by age group, sex, co-  
29 morbidity, median neighborhood income[18 ,19], health region[20], immigration status,  
30 and prior FOBT. Comorbidity was measured by counting the number of Aggregated  
31 Diagnosis Groups (ADGs) in the prior 12 months according to the Johns Hopkins ACG®  
32 Case-Mix System.[21] This system has been shown to accurately predict mortality in a  
33 general population ambulatory cohort in Ontario.[22] We used date of registration in the  
34 RPDB as a proxy measure for immigration status; participants were considered recent  
35 immigrants if their date of registration was within 5 years of the index date.[23]  
36  
37  
38  
39  
40  
41  
42  
43  
44  
45  
46  
47  
48

49 Physicians were characterized according to age, sex, training location (attended  
50 Canadian medical school vs. outside of Canada), practice type, size of practice, age-  
51  
52  
53  
54  
55  
56  
57  
58  
59  
60



Tinmouth et al.

Physician-linked mailed invitations for colorectal cancer screening

1  
2  
3  
4 eligible rate of colonoscopy or FOBT over prior 2 years as well as the age-eligible rate of  
5  
6 annual physical exams or influenza vaccinations in the prior year. All physicians were in  
7  
8 PEMs; practice types included family health groups (FHGs, enhanced fee-for-service  
9  
10 models), family health organizations or networks (FHO/FHNs, blended capitation  
11  
12 models), FHO/FHN with family health team (FHO/FHN-FHT, interprofessional team  
13  
14 model with a blended capitation fee structure) and other PEMs.[24] We measured  
15  
16 practice size as the number of enrolled patients stratified in a binary fashion ( $\leq 1800$  vs.  
17  
18  $>1800$  enrolled patients) as larger practice sizes have been shown to be associated with  
19  
20 poorer preventative care.[25] For the remaining physician characteristics, we identified  
21  
22 all enrolled and non-enrolled patients aged 50-74 years in their practices as of the index  
23  
24 date. Age-eligible FOBT and colonoscopy rates were obtained for each Pilot physician  
25  
26 by calculating the proportion of their age-eligible patients who had had an FOBT or  
27  
28 colonoscopy in the 2 years prior to the index date. Similarly, we calculated their rates of  
29  
30 age-eligible annual physical exams or influenza vaccine in the year prior to the index  
31  
32 date. These variables were derived in order to estimate physician adherence to CRC  
33  
34 screening and preventive medicine practices at baseline.  
35  
36  
37  
38  
39  
40  
41  
42  
43  
44

45 Analysis: The number and proportion of persons in the cohort who responded to the  
46  
47 mailed invitation within 6 months were determined overall and by participant and  
48  
49 physician characteristics. Multivariate logistic regression modeling was used to identify  
50  
51 participant and physician factors associated with response to the mailed invitation. In  
52  
53  
54  
55  
56  
57  
58  
59  
60

1  
2  
3  
4 order to account for potential clustering of participants within physicians, Generalized  
5  
6 Estimating Equations (GEE) were used in the model.  
7  
8  
9

## 10 11 **Study 2: Evaluation of the effectiveness of mailed invitations**

12  
13 Overview and study participants: This was a matched double cohort analysis, comparing  
14  
15 uptake of FOBT in those who were sent a mailed invitation (Pilot cohort) to a matched  
16  
17 control group who were not sent a mailed invitation. The control group comprised  
18  
19 patients who were enrolled to PEM physicians who had not participated in the Pilot.  
20  
21 Control participants received “usual care” for the CCC program in terms of screening  
22  
23 promotion. As such, they received screening via their primary care physician who were  
24  
25 eligible for the same financial incentives as Pilot physicians. Control participants were  
26  
27 not sent a centralized physician-linked invitation from the CCC program although their  
28  
29 physicians could send them a mailed invitation at their own discretion.  
30  
31  
32  
33  
34  
35  
36

37  
38 The Pilot cohort comprised all members of the cohort described in Study 1 for whom a  
39  
40 matched control could be identified. We identified potential controls as follows: 1) Pilot  
41  
42 physicians were matched to non-Pilot physicians who were also practicing in PEMs in a  
43  
44 1:5 ratio using physician age, sex, size and practice type; 2) individuals enrolled to the  
45  
46 selected control physicians were retained if they met the same inclusion/exclusion  
47  
48 criteria as those in the intervention cohort (aged 50 to 74 years with no prior CRC who  
49  
50 were due for CRC screening). As with the identification of eligible participants in the  
51  
52  
53  
54  
55  
56  
57  
58  
59  
60

Tinmouth et al.

Physician-linked mailed invitations for colorectal cancer screening

1  
2  
3  
4 Pilot, we used CAPE, Ontario Cancer Registry, OHIP, CIRT and LRT to determine  
5  
6 eligibility of potential control participants.  
7  
8  
9

10  
11 Propensity scores that modeled the probability of belonging to the Pilot group were  
12  
13 calculated for each participant in the entire group (Pilot and control). The variables in this  
14  
15 model included age (as a continuous measure), sex, co-morbidity, median neighborhood  
16  
17 income quintile, health region, immigration status, and FOBT from 2 to 5 years prior.[26  
18  
19 ,27] Pilot participants were matched to controls in a 1:1 fashion based on propensity  
20  
21 scores using a caliper width of 0.25. This methodology was implemented to balance the  
22  
23 distribution of participant-level variables between the Pilot and control groups.  
24  
25  
26  
27  
28  
29  
30  
31  
32

33 Response to mailed invitation: For our primary outcome, we defined response to the  
34  
35 mailed invitation as in Study 1, a record of FOBT regardless of result, within 6 months of  
36  
37 the index date. For our secondary outcome, response was defined as a record of either  
38  
39 FOBT or colonoscopy within 6 months of the index date. For the purposes of this study,  
40  
41 controls were assigned the same index date as their matched counterpart in the Pilot  
42  
43 group.  
44  
45  
46  
47  
48  
49  
50  
51  
52  
53  
54  
55  
56  
57  
58  
59  
60

1  
2  
3  
4 Analysis: Standard differences between the Pilot participants and controls were  
5  
6 calculated for the variables included in the propensity score. Important differences  
7  
8 between the 2 groups were defined by a standardized difference exceeding 0.1.[27 ,28]  
9  
10 In the primary analysis, we compared the number and proportion in the Pilot and control  
11  
12 groups responding to the mailed invitation with FOBT using McNemar's test.[27] We  
13  
14 determined the number of invitations mailed in order to screen one additional person  
15  
16 with FOBT. We repeated the above analyses using our secondary outcome in order to  
17  
18 determine if observed differences in FOBT uptake could be attributed to differences in  
19  
20 colonoscopy uptake (i.e., participants had CRC screening but chose colonoscopy over  
21  
22 FOBT). As the matching only accounted for participant-level variables, we repeated our  
23  
24 analyses using conditional logistic regression in order to adjust for physician covariates  
25  
26 (age, sex, practice type and size).  
27  
28  
29  
30  
31  
32  
33  
34

## 35 RESULTS

### 36 Study 1: Factors associated with response to the mailed invitation

37  
38 There were 11,311 eligible patient participants associated with the 102 family physicians  
39  
40 in the Pilot cohort. Nine participants were excluded as we were unable to determine  
41  
42 their health region and/or income quintile; this left 11,302 participants for the analysis.  
43  
44 The majority of participants were 50 to 59 years of age, 52% were women, 48% had no  
45  
46 or low co-morbidity and 14% had completed an FOBT from 2 to 5 years prior to the  
47  
48 mailing. Two thirds of participants had a male physician, approximately half were part of  
49  
50  
51  
52  
53  
54  
55  
56  
57  
58  
59  
60

1  
2  
3  
4 a primary care team reimbursed via an enhanced fee-for-service arrangement and just  
5  
6 under half were enrolled in larger practices (>1800 enrolled patients) (Table 1).  
7  
8

9  
10  
11 2503 (22%) completed an FOBT within 6 months of mailing. In the multivariate  
12  
13 regression, the strongest participant factor associated with FOBT completion was prior  
14  
15 FOBT use (2 to 5 years prior vs. > 5 years or never: OR 2.8, 95% C.I.: 2.5 to 3.3,  $p <$   
16  
17 0.0001). Other significant factors associated with FOBT completion included older  
18  
19 participant age, greater co-morbidity, and having a female physician (Table 2).  
20  
21  
22  
23  
24

## 25 26 **Study 2: Evaluation of the effectiveness of mailed invitations**

27  
28 Of the 11,302 participants in Study 1, 10,652 were successfully matched to 10,652  
29  
30 controls using propensity scores. Standardized differences for the participant  
31  
32 characteristics included in the propensity score were all  $<0.1$ , indicating that the two  
33  
34 cohorts were well matched for measurable potential confounders (Table 3).  
35  
36  
37  
38  
39

40 Pilot participants were significantly more likely than controls to complete FOBT alone  
41  
42 (2387 (22%) versus 854 (8%),  $p < 0.0001$ ) and FOBT or colonoscopy (2664 (25%) vs.  
43  
44 1191 (11%),  $p < 0.0001$ ) within 6 months of mailing. The association between the mailed  
45  
46 invitation and CRC screening participation (either FOBT alone or FOBT or colonoscopy)  
47  
48 remained after adjusting for physician level characteristics (Table 4).  
49  
50  
51  
52  
53  
54  
55  
56  
57  
58  
59  
60

## DISCUSSION

In the current study, we have demonstrated that physician-linked mailed invitations are both feasible and effective in the context of a large organized, population-based screening program; only 7 letters would need to be sent in order to screen one additional person. Furthermore, we have found that older participants, those with greater comorbidity, those who have previously been screened and those with female physicians were more likely to respond to this type of invitation. Our findings are of particular interest to other jurisdictions planning or who already have organized CRC screening.

In other published studies of mailed invitations, an FOBT kit is often included with the invitation. Three studies done outside organized screening programs have found physician-linked invitations superior to non-linked invitations; 2 of these studies included an FOBT kit,[29 ,30] and the third study did not.[31] Other studies have examined mailed invitations with FOBT kits in the context of primary care practices in the USA.[32-34] While the results from these trials were largely supportive of mailed invitations, kit inclusion can make it difficult to separate the convenience of receiving the FOBT kit directly by mail from the impact of an invitation from one's own physician.

Our study demonstrates the effectiveness and feasibility of physician-linked invitations in the context of a large organized CRC screening program with an estimated target population of over 3 million persons. Implementation in this context confers challenges in

1  
2  
3  
4 terms of technological infra-structure, privacy and regulatory issues. There are 2 studies  
5  
6 (from the United Kingdom[35] and Italy[36]) that have reported on mailed invitations in  
7  
8 the context of organized colorectal cancer screening programs and found them to be  
9  
10 effective. Both studies included FOBT kits and one studied the impact of physician  
11  
12 endorsement specifically.[35] Our findings are important because they support a  
13  
14 potentially more cost-effective approach that avoids wasting kits that are mailed but not  
15  
16 used.  
17  
18  
19  
20

21  
22  
23 Our results highlight the critical role of physician recommendation, a finding supported  
24  
25 by others. For example, in the NHS Bowel Cancer Screening Programme (BCSP)  
26  
27 currently, the primary care physician receives the result but is not directly involved in the  
28  
29 mailed invitation or the actual screening. Recently, a randomized controlled trial  
30  
31 conducted in the context of the BCSP showed that an endorsement letter from the  
32  
33 primary care provider increased participation by 6%.[35] In 2 studies from Australia,  
34  
35 endorsement improved initial participation[29 ,30] and over 4 successive screening  
36  
37 rounds.[30]  
38  
39  
40  
41  
42  
43

44 Uptake of FOBT in Ontario is lower than some organized CRC screening programs in  
45  
46 other countries. For example, 30% of Ontarians were up-to-date with FOBT in 2008-  
47  
48 9[37] compared to 52% participation in the United Kingdom program by October  
49  
50 2008,[38] 54% in the Italian program in 2007,[39] and 54% in the New Zealand pilot  
51  
52  
53  
54  
55  
56  
57  
58  
59  
60

1  
2  
3  
4 program in 2012.[40] However, in the latter countries, there is very little, if any,  
5  
6 opportunistic CRC screening using colonoscopy whereas Ontario's program operates in  
7  
8 a hybrid environment where opportunistic colonoscopy is available as the initial  
9  
10 screening test in persons at average risk. It has been noted that uptake of FOBT may  
11  
12 be lower in settings, such as Ontario's or Australia's,[41] where opportunistic screening  
13  
14 is available.[42] The findings from the current study indicate that physician-linked  
15  
16 invitations for CRC screening can be effective in increasing uptake of FOBT in programs  
17  
18 that operate in the context of opportunistic colonoscopy for average risk screening.  
19  
20  
21  
22  
23  
24

25  
26 Our study has several limitations. As mentioned above, we are unable to determine  
27  
28 family history using Ontario administrative data. A second limitation is that a single  
29  
30 generic letter was used. Tailored letters with key messages for specific subgroups may  
31  
32 be more effective,[15] an approach that may be relevant in Ontario as we did find that  
33  
34 response to the letter appeared to differ in various subgroups. Additionally, while our  
35  
36 findings are promising, there are challenges to widespread implementation in other  
37  
38 population-based screening programs, including the requirement for a centralized  
39  
40 database that links patients to their physicians. Finally, implementation of this strategy in  
41  
42 population based screening is predicated on physician acceptability and agreement.  
43  
44  
45 While we have found that this approach is acceptable in principle to many Ontario  
46  
47 physicians,[43] processes to confirm individual physician agreement have not been  
48  
49  
50  
51  
52  
53  
54  
55  
56  
57  
58  
59  
60



1  
2  
3  
4 determined for the entire CCC program which comprises an estimated 7000 primary  
5  
6 care physicians.  
7  
8  
9

## 10 11 **CONCLUSIONS**

12  
13  
14 In summary, we have demonstrated that physician-linked mailed invitations for CRC  
15  
16 screening, even without the inclusion of an FOBT kit, can have substantial effect on  
17  
18 participation in an organized CRC screening program and that it is technically feasible to  
19  
20 centrally organize and mail physician-linked invitations on a large scale. Organized  
21  
22 screening programs, which often use unlinked invitations, should consider adopting this  
23  
24 approach given its demonstrated effectiveness and feasibility.  
25  
26  
27  
28  
29

## 30 31 **ACKNOWLEDGEMENTS**

32  
33 The authors would like to acknowledge Peter Austin PhD for his expert statistic advice.  
34  
35 They also wish to acknowledge the support of the Institutes for Clinical Evaluative  
36  
37 Sciences, the Ontario Ministry of Health and Long Term Care and CCO. The opinions,  
38  
39 results and conclusions reported in this paper are those of the authors and are  
40  
41 independent from the funding sources. No endorsement by Institutes for Clinical  
42  
43 Evaluative Sciences, the Ontario Ministry of Health and Long Term Care and CCO is  
44  
45 intended or should be inferred.  
46  
47  
48  
49  
50

## 51 52 **COMPETING INTERESTS STATEMENT**

1  
2  
3  
4 Dr. Tinmouth is the Lead Scientist for the ColonCancerCheck program and Dr.  
5  
6 Rabeneck oversees the ColonCancerCheck program in her capacity as the Vice-  
7  
8 President, Cancer Prevention and Control at CCO. None of the other authors have any  
9  
10 conflicts of interest to report.  
11  
12  
13

## 14 15 16 **FUNDING STATEMENT**

17  
18 This study was conducted with the support of the Ontario Institute for Cancer Research  
19  
20 and CCO's Health Services Research Network, which is independent of the  
21  
22 ColonCancerCheck program, provided funding for this work. This work was also  
23  
24 supported in part by a grant from the Canadian Institutes for Health Research (grant #  
25  
26 CST-85478). Dr. Tinmouth was supported by a Canadian Institutes of Health Research  
27  
28 New Investigator Award during the period of this study.  
29  
30  
31  
32  
33  
34  
35

## 36 **AUTHOR CONTRIBUTION:**

37  
38 Authors contributed substantially to each of the following areas:  
39  
40 -conception and design (JT, LFP, LR) or analysis and interpretation of data (JT, NB,  
41  
42 LFP, LR, RS, LY)  
43  
44 -drafting the article (JT) or revising it critically for important intellectual content (JT, NB,  
45  
46 LFP, LR, RS, LY)  
47  
48 -final approval of the version to be published (JT, NB, LFP, LR, RS, LY)  
49  
50  
51  
52  
53  
54  
55  
56  
57  
58  
59  
60

## REFERENCES

1. Center MM, Jemal A, Ward E. International trends in colorectal cancer incidence rates. *Cancer Epidemiol. Biomarkers Prev.* 2009;**18**(6):1688-94.
2. Mandel JS, Church TR, Bond JH, et al. The effect of fecal occult-blood screening on the incidence of colorectal cancer. *N. Engl. J. Med.* 2000;**343**(22):1603-7.
3. Hardcastle JD, Chamberlain JO, Robinson MH, et al. Randomised controlled trial of faecal-occult-blood screening for colorectal cancer. *Lancet* 1996;**348**(9040):1472-7.
4. Kronborg O, Fenger C, Olsen J, et al. Randomised study of screening for colorectal cancer with faecal-occult-blood test. *Lancet* 1996;**348**(9040):1467-71.
5. Atkin WS, Edwards R, Kralj-Hans I, et al. Once-only flexible sigmoidoscopy screening in prevention of colorectal cancer: a multicentre randomised controlled trial. *Lancet* 2010;**375**(9726):1624-33.
6. Segnan N AP, Bonelli L, Risio M, Sciallero S, Zappa M, Andreoni B, Arrigoni A, Bisanti L, Casella C, Crosta C, Falcini F, Ferrero F, Giacomini A, Giuliani O, Santarelli A, Visioli CB, Zanetti R, Atkin WS, Senore C, and the SCORE Working Group. Once-Only Sigmoidoscopy in Colorectal Cancer Screening: Follow-up Findings of the Italian Randomized Controlled Trial—SCORE J. *Natl. Cancer Inst.* 2011;**103**(17):1310-22.
7. Schoen RE, Pinsky PF, Weissfeld JL, et al. Colorectal-cancer incidence and mortality with screening flexible sigmoidoscopy. *N. Engl. J. Med.* 2012;**366**(25):2345-57.
8. Miles A, Cockburn J, Smith RA, et al. A Perspective from Countries Using Organized Screening Programs. *Cancer* 2004;**104**(5 Suppl):1201-13.
9. International Cancer Screening Network. Inventory of Colorectal Cancer Screening Activities in ICSN Countries, May 2008. Last update: Feb 9 2009 2009. <http://appliedresearch.cancer.gov/icsn/colorectal/screening.html>.
10. Anonymous. Colon Cancer Check: Ontario's colorectal cancer screening program. Last update: Feb 2, 2012. <http://health.gov.on.ca/en/public/programs/coloncancercheck/>.
11. Glazier RH, Zagorski BM, Rayner J. Comparison of Primary Care Models in Ontario by Demographics, Case Mix and Emergency Department Use, 2008/09 to 2009/10. ICES Investigative Report. Toronto: Institute for Clinical Evaluative Sciences, 2012.
12. HealthForceOntario. Family Practice Models. Last update: May 3 2013. [http://www.healthforceontario.ca/Work/OutsideOntario/PhysiciansOutsideOntario/PractisingInOntario/family\\_practice\\_models.aspx](http://www.healthforceontario.ca/Work/OutsideOntario/PhysiciansOutsideOntario/PractisingInOntario/family_practice_models.aspx).
13. Ontario Ministry of Health and Long-Term Care. Bulletin 4482: ColonCancerCheck Physician Incentives. . Last update: July 22, 2008. <http://www.health.gov.on.ca/en/pro/programs/ohip/bulletins/4000/bul4482.pdf>.

14. Khalid-de Bakker C, Jonkers D, Smits K, et al. Participation in colorectal cancer screening trials after first-time invitation: a systematic review. *Endoscopy* 2011;**43**(12):1059-86.
15. Rawl SM, Skinner CS, Perkins SM, et al. Computer-delivered tailored intervention improves colon cancer screening knowledge and health beliefs of African-Americans. *Health Educ. Res.* 2012;**27**(5):868-85.
16. Alharbi O, Rabeneck L, Sutradhar R, et al. A population-based analysis of outpatient colonoscopy in adults assisted by an anesthesiologist. *Anesthesiology* 2009;**111**(4):734-40.
17. Robles SC, Marrett LD, Clarke EA, et al. An application of capture-recapture methods to the estimation of completeness of cancer registration. *J. Clin. Epidemiol.* 1988;**41**(5):495-501.
18. Alter DA, Naylor CD, Austin P, et al. Effects of socioeconomic status on access to invasive cardiac procedures and on mortality after acute myocardial infarction. *N. Engl. J. Med.* 1999;**341**(18):1359-67.
19. Singh SM, Paszat LF, Li C, et al. Association of socioeconomic status and receipt of colorectal cancer investigations: a population-based retrospective cohort study. *Can. Med. Assoc. J.* 2004;**171**(5):461-5.
20. Anonymous. Ontario's Local Health Integration Networks. Last update: May 30 2013 2013. <http://www.lhins.on.ca/home.aspx>.
21. Anonymous. The Johns Hopkins University ACG Case-Mix System. Last update: 2012. <http://www.acg.jhsph.edu/>.
22. Austin PC, van Walraven C, Wodchis WP, et al. Using the Johns Hopkins Aggregated Diagnosis Groups (ADGs) to predict mortality in a general adult population cohort in Ontario, Canada. *Med. Care* 2011;**49**(10):932-9.
23. Ray JG, Vermeulen MJ, Schull MJ, et al. Results of the Recent Immigrant Pregnancy and Perinatal Long-term Evaluation Study (RIPPLES). 2007;**176**(10):1419-26.
24. Glazier RH, Klein-Geltink J, Kopp A, et al. Capitation and enhanced fee-for-service models for primary care reform: a population-based evaluation. *Can. Med. Assoc. J.* 2009;**180**(11):E72-E81.
25. Dahrouge S, Hogg WE, Russell G, et al. Impact of remuneration and organizational factors on completing preventive manoeuvres in primary care practices. *CMAJ* 2012;**184**(2):E135-43 doi: 10.1503/cmaj.110407.
26. D'Agostino RB, Jr. Propensity score methods for bias reduction in the comparison of a treatment to a non-randomized control group. *Stat. Med.* 1998;**17**(19):2265-81.
27. Austin PC. An Introduction to Propensity Score Methods for Reducing the Effects of Confounding in Observational Studies. *Multivariate behavioral research* 2011;**46**(3):399-424.

Tinmouth et al.

Physician-linked mailed invitations for colorectal cancer screening

28. Normand ST, Landrum MB, Guadagnoli E, et al. Validating recommendations for coronary angiography following acute myocardial infarction in the elderly: a matched analysis using propensity scores. *J. Clin. Epidemiol.* 2001;**54**(4):387-98.
29. Cole SR, Young GP, Byrne D, et al. Participation in screening for colorectal cancer based on a faecal occult blood test is improved by endorsement by the primary care practitioner. *J. Med. Screen.* 2002;**9**(4):147-52.
30. Zajac IT, Whibley AH, Cole SR, et al. Endorsement by the primary care practitioner consistently improves participation in screening for colorectal cancer: a longitudinal analysis. *J. Med. Screen.* 2010;**17**(1):19-24.
31. Grazzini G, Castiglione G, Isu A, et al. Colorectal cancer screening by fecal occult blood testing: results of a population-based experience. *Tumori* 2000;**86**(5):384-8.
32. Myers RE, Sifri R, Hyslop T, et al. A randomized controlled trial of the impact of targeted and tailored interventions on colorectal cancer screening. *Cancer* 2007;**110**(9):2083-91.
33. Sequist TD, Zaslavsky AM, Marshall R, et al. Patient and physician reminders to promote colorectal cancer screening: a randomized controlled trial. *Arch. Intern. Med.* 2009;**169**(4):364-71.
34. Walsh JM, Salazar R, Terdiman JP, et al. Promoting use of colorectal cancer screening tests. Can we change physician behavior? *J Gen Intern Med* 2005;**20**(12):1097-101.
35. Hewitson P, Ward AM, Heneghan C, et al. Primary care endorsement letter and a patient leaflet to improve participation in colorectal cancer screening: results of a factorial randomised trial. *Br. J. Cancer* 2011;**105**(4):475-80.
36. Giorgi Rossi P, Grazzini G, Anti M, et al. Direct mailing of faecal occult blood tests for colorectal cancer screening: a randomized population study from Central Italy. *J. Med. Screen.* 2011;**18**(3):121-7 doi: 10.1258/jms.2011.011009.
37. Cancer Quality Council of Ontario. Colorectal Cancer Screening: Participation. . Last update: 2013.  
<http://www.csqi.on.ca/cms/one.aspx?portalId=258922&pageId=273238#UijqNMAkrmQ>.
38. Logan RF, Patnick J, Nickerson C, et al. Outcomes of the Bowel Cancer Screening Programme (BCSP) in England after the first 1 million tests. *Gut* 2012;**61**(10):1439-46.
39. Parente F, Boemo C, Ardizzoia A, et al. Outcomes and cost evaluation of the first two rounds of a colorectal cancer screening program based on immunochemical fecal occult blood test in northern Italy. *Endoscopy* 2013;**45**(1):27-34.
40. New Zealand Ministry of Health. Bowel Screening Pilot January to June 2012 results. Last update: 26 April 2013. <http://www.health.govt.nz/our-work/diseases-and-conditions/cancer-programme/bowel-cancer->

- 1  
2  
3  
4  
5  
6  
7  
8  
9  
10  
11  
12  
13  
14  
15  
16  
17  
18  
19  
20  
21  
22  
23  
24  
25  
26  
27  
28  
29  
30  
31  
32  
33  
34  
35  
36  
37  
38  
39  
40  
41  
42  
43  
44  
45  
46  
47  
48  
49  
50  
51  
52  
53  
54  
55  
56  
57  
58  
59  
60
- [programme/bowel-screening-pilot/bowel-screening-pilot-results/bowel-screening-pilot-january-june-2012-results.](#)
41. Zajac IT, Flight I, Turnbull D, et al. Self-reported bowel screening rates in older Australians and the implications for public health screening programs. *The Australasian medical journal* 2013;**6**(8):411-7.
42. Moss SM, Ancelle-Park R, Brenner H. Evaluation and interpretation of screening outcomes. In: Patnick J, Segnan N, von Karsa L, eds. *European guidelines for quality assurance in colorectal cancer screening and diagnosis*. Luxembourg: International Agency for Research on Cancer 2010.
43. Tinmouth J, Ritvo P, McGregor SE, et al. ColonCancerCheck Primary Care Invitation Pilot project: family physician perceptions. *Can. Fam. Physician* 2012;**58**(10):e570-7.

Tinmouth et al.

Physician-linked mailed invitations for colorectal cancer screening

## Tables.

Table 1. Patient participant and physician characteristics for Study 1

|                                              | FOBT within 6 months<br>(n=2,503) | No FOBT within 6 months<br>(n=8,799) | Total<br>(n=11,302) |
|----------------------------------------------|-----------------------------------|--------------------------------------|---------------------|
| <b>Patient participants</b>                  |                                   |                                      |                     |
| Age group in years, No. (%)                  |                                   |                                      |                     |
| 50-59                                        | 1,279 (51%)                       | 5,384 (61%)                          | 6,663 (59%)         |
| 60-69                                        | 894 (36%)                         | 2,637 (30%)                          | 3,531 (31%)         |
| 70-74                                        | 330 (13%)                         | 778 (9%)                             | 1,108 (10%)         |
| Sex, No. (%)                                 |                                   |                                      |                     |
| Female                                       | 1,299 (52%)                       | 4,554 (52%)                          | 5,853 (52%)         |
| Male                                         | 1,204 (48%)                       | 4,245 (48%)                          | 5,449 (48%)         |
| Co-morbidity*, No. of ADGs (%)               |                                   |                                      |                     |
| 0                                            | 257 (10%)                         | 1,279 (15%)                          | 1,536 (14%)         |
| 1-2                                          | 828 (33%)                         | 3,044 (35%)                          | 3,872 (34%)         |
| 3-4                                          | 712 (28%)                         | 2,241 (25%)                          | 2,953 (26%)         |
| 5-6                                          | 393 (16%)                         | 1,224 (14%)                          | 1,617 (14%)         |
| 7+                                           | 313 (13%)                         | 1,011 (11%)                          | 1,324 (12%)         |
| Median neighborhood income quintile, No. (%) |                                   |                                      |                     |
| Rural                                        | 394 (16%)                         | 1,431 (16%)                          | 1,825 (16%)         |
| Low Urban                                    | 360 (14%)                         | 1,375 (16%)                          | 1,735 (15%)         |
| 2                                            | 402 (16%)                         | 1,418 (16%)                          | 1,820 (16%)         |
| 3                                            | 429 (17%)                         | 1,430 (16%)                          | 1,859 (16%)         |
| 4                                            | 432 (17%)                         | 1,552 (18%)                          | 1,984 (18%)         |
| High Urban                                   | 486 (19%)                         | 1,593 (18%)                          | 2,079 (18%)         |
| Health region, No. (%)                       |                                   |                                      |                     |
| Erie St.Clair                                | 125 (5%)                          | 337 (4%)                             | 462 (4%)            |
| South West                                   | 284 (11%)                         | 823 (9%)                             | 1,107 (10%)         |
| Waterloo Wellington                          | 76 (3%)                           | 251 (3%)                             | 327 (3%)            |
| Hamilton Niagara                             | 289 (12%)                         | 976 (11%)                            | 1,265 (11%)         |
| Central West                                 | 138 (6%)                          | 482 (5%)                             | 620 (5%)            |
| Mississauga Halton                           | 22 (1%)                           | 120 (1%)                             | 142 (1%)            |
| Toronto Central                              | 111 (4%)                          | 392 (4%)                             | 503 (4%)            |
| Central                                      | 24 (1%)                           | 177 (2%)                             | 201 (2%)            |
| Central East                                 | 361 (14%)                         | 1,282 (15%)                          | 1,643 (15%)         |
| South East                                   | 162 (6%)                          | 697 (8%)                             | 859 (8%)            |
| Champlain                                    | 219 (9%)                          | 676 (8%)                             | 895 (8%)            |
| North Simcoe-Muskoka                         | 77 (3%)                           | 188 (2%)                             | 265 (2%)            |
| North East                                   | 291 (12%)                         | 1,118 (13%)                          | 1,409 (12%)         |
| North West                                   | 324 (13%)                         | 1,280 (15%)                          | 1,604 (14%)         |

## Physician-linked mailed invitations for colorectal cancer screening

|                                                              |             |             |             |
|--------------------------------------------------------------|-------------|-------------|-------------|
| Recent immigrant, No. (%)                                    | 23 (1%)     | 88 (1%)     | 111 (1%)    |
| FOBT 2 to 5 years prior to mailing, No. (%)                  | 643 (26%)   | 905 (10%)   | 1,548 (14%) |
| <b>Physician</b>                                             |             |             |             |
| Median age in years (IQR)                                    | 52 (45-59)  | 53 (46-59)  | 52 (45-59)  |
| Sex, No. (%)                                                 |             |             |             |
| Female                                                       | 936 (37%)   | 3,044 (35%) | 3,980 (35%) |
| Male                                                         | 1,567 (63%) | 5,755 (65%) | 7,322 (65%) |
| Training location, No. (%)                                   |             |             |             |
| Outside Canada                                               | 312 (12%)   | 1,196 (14%) | 1,508 (13%) |
| In Canada                                                    | 2,191 (88%) | 7,603 (86%) | 9,794 (87%) |
| Practice type, No. (%)                                       |             |             |             |
| FHG                                                          | 1,082 (43%) | 4,266 (48%) | 5,348 (47%) |
| FHO/FHN                                                      | 432 (17%)   | 1,456 (17%) | 1,888 (17%) |
| FHO/FHN-FHT                                                  | 881 (35%)   | 2,620 (30%) | 3,501 (31%) |
| Other PEM                                                    | 108 (4%)    | 457 (5%)    | 565 (5%)    |
| Practice size (enrolled patients), No. (%)                   |             |             |             |
| >1800 patients                                               | 1,105 (44%) | 4,104 (47%) | 5,209 (46%) |
| Age-eligible rate of colonoscopy quintile, No. (%)           |             |             |             |
| Low                                                          | 485 (19%)   | 1,619 (18%) | 2,104 (19%) |
| 2                                                            | 548 (22%)   | 1,940 (22%) | 2,488 (22%) |
| 3                                                            | 637 (25%)   | 2,279 (26%) | 2,916 (26%) |
| 4                                                            | 477 (19%)   | 1,696 (19%) | 2,173 (19%) |
| High                                                         | 356 (14%)   | 1,265 (14%) | 1,621 (14%) |
| Age-eligible rate of FOBT quintile, No. (%)                  |             |             |             |
| Low                                                          | 487 (19%)   | 1,888 (21%) | 2,375 (21%) |
| 2                                                            | 504 (20%)   | 1,886 (21%) | 2,390 (21%) |
| 3                                                            | 533 (21%)   | 1,890 (21%) | 2,423 (21%) |
| 4                                                            | 522 (21%)   | 1,680 (19%) | 2,202 (19%) |
| High                                                         | 457 (18%)   | 1,455 (17%) | 1,912 (17%) |
| Age-eligible rate of annual physical exams quintile, No. (%) |             |             |             |
| Low                                                          | 496 (20%)   | 2,009 (23%) | 2,505 (22%) |
| 2                                                            | 490 (20%)   | 1,625 (18%) | 2,115 (19%) |
| 3                                                            | 472 (19%)   | 1,638 (19%) | 2,110 (19%) |
| 4                                                            | 509 (20%)   | 1,686 (19%) | 2,195 (19%) |
| High                                                         | 536 (21%)   | 1,841 (21%) | 2,377 (21%) |



Tinmouth et al.

Physician-linked mailed invitations for colorectal cancer screening

|                                                          |           |             |             |
|----------------------------------------------------------|-----------|-------------|-------------|
| Age-eligible rate of influenza vaccine quintile, No. (%) |           |             |             |
| Low                                                      | 548 (22%) | 1,997 (23%) | 2,545 (23%) |
| 2                                                        | 549 (22%) | 1,765 (20%) | 2,314 (20%) |
| 3                                                        | 435 (17%) | 1,930 (22%) | 2,365 (21%) |
| 4                                                        | 485 (19%) | 1,770 (20%) | 2,255 (20%) |
| High                                                     | 486 (19%) | 1,337 (15%) | 1,823 (16%) |

\*Co-morbidity scored using number of Aggregated Diagnosis Groups (ADGs) using the Johns Hopkins Case Mix System

FHG = family health group

FHO/FHN = family health organizations or networks

Other PEM = other patient enrolled model of care

FOBT = fecal occult blood test

For peer review only

1  
2  
3  
4  
5  
6  
7  
8  
9  
10  
11  
12  
13  
14  
15  
16  
17  
18  
19  
20  
21  
22  
23  
24  
25  
26  
27  
28  
29  
30  
31  
32  
33  
34  
35  
36  
37  
38  
39  
40  
41  
42  
43  
44  
45  
46  
47  
48  
49  
50  
51  
52  
53  
54  
55  
56  
57  
58  
59  
60

Table 2. Multivariate logistic regression analysis using Generalized Estimating Equations for the characteristics of participants and physicians associated with completing an FOBT within 6 months of the mailing date.

| Participants                        | Odds ratio (95% C.I.) | P-value |
|-------------------------------------|-----------------------|---------|
| Age group, years                    |                       |         |
| 50-59                               | 0.6 (0.5, 0.8)        | <.0001  |
| 60-69                               | 0.8 (0.7, 1.0)        | NS      |
| 70-74                               | Reference             | N/A     |
| Sex                                 |                       |         |
| Female                              | 0.9 (0.9, 1.0)        | NS      |
| Male                                | Reference             | N/A     |
| Co-morbidity*, No. of ADGs          |                       |         |
| 0                                   | 0.7 (0.6, 0.8)        | 0.0002  |
| 1-2                                 | 0.9 (0.7, 1.0)        | NS      |
| 3-4                                 | 1.0 (0.9, 1.2)        | NS      |
| 5-6                                 | 1.0 (0.9, 1.2)        | NS      |
| 7+                                  | Reference             | N/A     |
| Median neighborhood income quintile |                       |         |
| Rural                               | 0.9 (0.7, 1.1)        | NS      |
| Low Urban                           | 0.9 (0.7, 1.0)        | NS      |
| 2                                   | 1.0 (0.8, 1.1)        | NS      |
| 3                                   | 1.0 (0.9, 1.1)        | NS      |
| 4                                   | 0.9 (0.8, 1.1)        | NS      |
| High Urban                          | Reference             | N/A     |
| Health region                       |                       |         |
| Erie St.Clair                       | 1.3 (0.9, 1.8)        | NS      |
| South West                          | 0.9 (0.6, 1.4)        | NS      |
| Waterloo Wellington                 | 0.8 (0.6, 1.2)        | NS      |
| Hamilton Niagara                    | 0.9 (0.6, 1.2)        | NS      |
| Central West                        | 1.0 (0.7, 1.4)        | NS      |
| Mississauga Halton                  | 0.6 (0.3, 1.2)        | NS      |
| Toronto Central                     | 0.8 (0.6, 1.2)        | NS      |
| Central                             | 0.5 (0.4, 0.7)        | 0.0004  |
| South East                          | 0.8 (0.4, 0.7)        | NS      |
| Champlain                           | 1.0 (0.7, 1.4)        | NS      |
| North Simcoe-Muskoka                | 0.9 (0.6, 1.4)        | NS      |
| North East                          | 1.1 (0.7, 1.5)        | NS      |
| North West                          | 0.7 (0.5, 1.0)        | 0.03    |
| Central East                        | Reference             | N/A     |
| Recency of immigration              |                       |         |
| Remote or non-immigrant             | 1.0 (0.6, 1.6)        | NS      |
| Recent immigrant                    | Reference             | N/A     |
| Prior FOBT Use                      |                       |         |
| 2 to 5 years prior to mailing       | 2.8 (2.5, 3.3)        | <.0001  |

Tinmouth et al.

## Physician-linked mailed invitations for colorectal cancer screening

|                                                     |                |      |
|-----------------------------------------------------|----------------|------|
| > 5 years or never                                  | Reference      |      |
| <b>Physician</b>                                    |                |      |
| Increasing age (per year)                           | 1.0 (1.0, 1.0) | NS   |
| Sex                                                 |                |      |
| Female                                              | 1.3 (1.0, 1.5) | 0.02 |
| Male                                                | Reference      | N/A  |
| Training location                                   |                |      |
| In Canada                                           | 0.9 (0.7, 1.2) | NS   |
| Outside Canada                                      | Reference      | N/A  |
| Practice type                                       |                |      |
| FHG                                                 | 0.9 (0.7, 1.1) | NS   |
| FHO/FHN                                             | 0.8 (0.6, 1.1) | NS   |
| Other PEM                                           | 0.7 (0.4, 1.0) | 0.05 |
| FHO/FHN-FHT                                         | Reference      | N/A  |
| Practice size (enrolled patients)                   |                |      |
| ≤ 1800 patients                                     | 1.1 (0.9, 1.3) | NS   |
| > 1800 patients                                     | Reference      | N/A  |
| Age-eligible rate of colonoscopy quintile           |                |      |
| Low                                                 | 1.1 (0.8, 1.5) | NS   |
| 2                                                   | 1.2 (1.0, 1.6) | NS   |
| 3                                                   | 1.0 (0.8, 1.2) | NS   |
| 4                                                   | 1.0 (0.8, 1.3) | NS   |
| High                                                | Reference      | N/A  |
| Age-eligible rate of FOBT quintile                  |                |      |
| 2                                                   | 0.9 (0.6, 1.3) | NS   |
| 3                                                   | 0.9 (0.7, 1.2) | NS   |
| 4                                                   | 1.1 (0.8, 1.4) | NS   |
| High                                                | 0.9 (0.7, 1.3) | NS   |
| Low                                                 | Reference      | N/A  |
| Age-eligible rate of annual physical exams quintile |                |      |
| 2                                                   | 1.4 (0.9, 2.0) | NS   |
| 3                                                   | 1.3 (0.9, 1.8) | NS   |
| 4                                                   | 1.3 (0.9, 1.8) | NS   |
| High                                                | 1.1 (0.8, 1.5) | NS   |
| Low                                                 | Reference      | N/A  |
| Age-eligible rate of influenza vaccine quintile     |                |      |
| 2                                                   | 1.0 (0.8, 1.2) | NS   |
| 3                                                   | 0.8 (0.6, 1.0) | 0.02 |
| 4                                                   | 0.9 (0.7, 1.2) | NS   |
| High                                                | 1.3 (1.0, 1.7) | NS   |
| Low                                                 | Reference      | N/A  |

\*Co-morbidity scored using number of Aggregated Diagnosis Groups (ADGs) using the Johns Hopkins Case Mix System

FHG = family health group

FHO/FHN = family health organizations or networks

1  
2  
3  
4  
5  
6  
7  
8  
9  
10  
11  
12  
13  
14  
15  
16  
17  
18  
19  
20  
21  
22  
23  
24  
25  
26  
27  
28  
29  
30  
31  
32  
33  
34  
35  
36  
37  
38  
39  
40  
41  
42  
43  
44  
45  
46  
47  
48  
49  
50  
51  
52  
53  
54  
55  
56  
57  
58  
59  
60

Other PEM = other patient enrolled model of care  
NS = not significant  
N/A - not applicable  
FOBT = fecal occult blood test

For peer review only

Tinmouth et al.

Physician-linked mailed invitations for colorectal cancer screening

Table 3. Characteristics of the 2 cohorts matched by propensity score in Study 2

|                                              | Pilot participants<br>(n=10,652) | Control participants<br>(n=10,652) | Standardized Difference* |
|----------------------------------------------|----------------------------------|------------------------------------|--------------------------|
| <b>Participants</b>                          |                                  |                                    |                          |
| Age group in years, No. (%)                  |                                  |                                    |                          |
| 50-59                                        | 6,248 (59%)                      | 6,324 (59%)                        | 0.01                     |
| 60-69                                        | 3,342 (31%)                      | 3,316 (31%)                        | 0.01                     |
| 70-74                                        | 1,062 (10%)                      | 1,012 (10%)                        | 0.02                     |
| Sex, No. (%)                                 |                                  |                                    |                          |
| Female                                       | 5548 (52%)                       | 5477 (51%)                         | 0.01                     |
| Male                                         | 5,104 (48%)                      | 5,175 (49%)                        | 0.01                     |
| Co-morbidity**, No. of ADGs (%)              |                                  |                                    |                          |
| 0                                            | 1,462 (14%)                      | 1,425 (13%)                        | 0.01                     |
| 1-2                                          | 3,647 (34%)                      | 3,716 (35%)                        | 0.01                     |
| 3-4                                          | 2,764 (26%)                      | 2,835 (27%)                        | 0.02                     |
| 5-6                                          | 1,536 (14%)                      | 1,473 (14%)                        | 0.02                     |
| 7+                                           | 1,243 (12%)                      | 1,203 (11%)                        | 0.01                     |
| Median neighborhood income quintile, No. (%) |                                  |                                    |                          |
| Rural                                        | 1,825 (17%)                      | 1,889 (18%)                        | 0.02                     |
| Low Urban                                    | 1,628 (15%)                      | 1,699 (16%)                        | 0.02                     |
| 2                                            | 1,698 (16%)                      | 1,728 (16%)                        | 0.01                     |
| 3                                            | 1,728 (16%)                      | 1,681 (16%)                        | 0.01                     |
| 4                                            | 1,831 (17%)                      | 1,753 (16%)                        | 0.02                     |
| High Urban                                   | 1,942 (18%)                      | 1,902 (18%)                        | 0.01                     |
| Health region, No. (%)                       |                                  |                                    |                          |
| Erie St.Clair                                | 462 (4%)                         | 423 (4%)                           | 0.02                     |
| South West                                   | 1,107 (10%)                      | 1,114 (10%)                        | 0                        |
| Waterloo Wellington                          | 327 (3%)                         | 343 (3%)                           | 0.01                     |
| Hamilton Niagara                             | 1,265 (12%)                      | 1,290 (12%)                        | 0.01                     |
| Central West                                 | 620 (6%)                         | 580 (5%)                           | 0.02                     |
| Mississauga Halton                           | 142 (1%)                         | 144 (1%)                           | 0                        |
| Toronto Central                              | 503 (5%)                         | 478 (4%)                           | 0.01                     |
| Central                                      | 201 (2%)                         | 209 (2%)                           | 0.01                     |
| Central East                                 | 1,643 (15%)                      | 1,702 (16%)                        | 0.02                     |
| South East                                   | 859 (8%)                         | 891 (8%)                           | 0.01                     |
| Champlain                                    | 895 (8%)                         | 904 (8%)                           | 0                        |
| North Simcoe-Muskoka                         | 265 (2%)                         | 242 (2%)                           | 0.01                     |
| North East                                   | 1,409 (13%)                      | 1,378 (13%)                        | 0.01                     |
| North West                                   | 954 (9%)                         | 954 (9%)                           | 0                        |
| Recent immigrant, No. (%)                    | 111 (1%)                         | 105 (1%)                           | 0.01                     |
| FOBT 2 to 5 years prior to mailing, No. (%)  | 1,476 (14%)                      | 1,240 (12%)                        | 0.07                     |
| <b>Physician</b>                             |                                  |                                    |                          |

## Physician-linked mailed invitations for colorectal cancer screening

|                                            |             |             |     |
|--------------------------------------------|-------------|-------------|-----|
| Median age in years (IQR)                  | 52 (45-59)  | 52 (47-58)  | N/A |
| Sex, No. (%)                               |             |             |     |
| Female                                     | 3,875 (36%) | 3,335 (31%) | N/A |
| Male                                       | 6,777 (64%) | 7,317 (69%) |     |
| Practice type, No. (%)                     |             |             |     |
| FHG                                        | 4,854 (46%) | 4,885 (46%) | N/A |
| FHO/FHN                                    | 1,859 (17%) | 1,718 (16%) |     |
| FHO/FHN-FHT                                | 3,374 (32%) | 3,027 (28%) |     |
| Other PEM                                  | 565 (5%)    | 1,022 (10%) |     |
| Practice size (enrolled patients), No. (%) |             |             |     |
| >1800 patients                             | 5,366 (50%) | 5,026 (47%) | N/A |

\*Standardized differences for physician level variables not reported as propensity scores were estimated using patient level characteristics only

\*\*Co-morbidity scored using number of Aggregated Diagnosis Groups (ADGs) using the Johns Hopkins Case Mix System

FHG = family health group

FHO/FHN = family health organizations or networks

Other PEM = other patient enrolled model of care

FOBT = fecal occult blood test

Tinmouth et al.

Physician-linked mailed invitations for colorectal cancer screening

Table 4. Association between mailed invitation and FOBT completion or mailed invitation and FOBT or colonoscopy completion after adjusting for physician factors.

|                                   | FOBT completion       |         | FOBT or Colonoscopy completion |         |
|-----------------------------------|-----------------------|---------|--------------------------------|---------|
|                                   | Odds ratio (95% C.I.) | P-value | Odds ratio (95% C.I.)          | P-value |
| Mailed invitation                 |                       |         |                                |         |
| Yes (Pilot)                       | 3.3 (3.1, 3.6)        | <.0001  | 2.7 (2.5, 2.9)                 | <.0001  |
| No (Controls)                     | Reference             | N/A     | Reference                      | N/A     |
| Increasing age (per year)         | 1.0 ( 1.0, 1.0)       | NS      | 1.0 (1.0, 1.0)                 | 0.03    |
| Sex, No. (%)                      |                       |         |                                |         |
| Female                            | 1.0 (0.9, 1.1)        | NS      | 1.0 (0.9, 1.1)                 | NS      |
| Male                              | Reference             | N/A     | Reference                      | N/A     |
| Practice type, No. (%)            |                       |         |                                |         |
| FHG                               | 0.7 (0.6, 0.8)        | <.0001  | 0.7 (0.7, 0.8)                 | <.0001  |
| FHO/FHN                           | 0.8 (0.7, 0.9)        | <.0001  | 0.8 (0.7, 0.9)                 | <.0001  |
| Other PEM                         | 0.8 (0.7, 1.0)        | 0.03    | 0.8 (0.7, 1.0)                 | NS      |
| FHO/FHN-FHT                       | Reference             | N/A     | Reference                      | N/A     |
| Practice size (enrolled patients) |                       |         |                                |         |
| ≤ 1800 patients                   | 1.2 (1.1, 1.3)        | 0.0004  | 1.2 (1.1, 1.3)                 | <.0001  |
| > 1800 patients                   | Reference             | N/A     | Reference                      | N/A     |

FHG = family health group

FHO/FHN = family health organizations or networks

Other PEM = other patient enrolled model of care

FOBT = fecal occult blood test

1  
2  
3  
4  
5  
6  
7  
8  
9  
10  
11  
12  
13  
14  
15  
16  
17  
18  
19  
20  
21  
22  
23  
24  
25  
26  
27  
28  
29  
30  
31  
32  
33  
34  
35  
36  
37  
38  
39  
40  
41  
42  
43  
44  
45  
46  
47  
48  
49  
50  
51  
52  
53  
54  
55  
56  
57  
58  
59  
60

Figure Legends

Figure 1. Mock-up of physician-linked invitation used in the Pilot.

For peer review only



## TITLE PAGE

**Title:** Physician-linked mailed invitations ~~s to be screened to be screened improves uptake~~ in an organized colorectal cancer screening program: ~~effectiveness and factors associated with response. Two linked cohort studies.~~

**Short title:** Physician-linked invitations for colorectal cancer screening

**Authors:**Jill Tinmouth<sup>1,3,5,6</sup>Nancy N. Baxter<sup>3,5,7</sup>Lawrence F. Paszat<sup>2,3,4</sup>Linda Rabeneck<sup>1,3,4,5,6</sup>Rinku Sutradhar<sup>3,4</sup>Lingsong Yun<sup>3</sup>

**Affiliations:** Departments of Medicine<sup>1</sup> and Radiation Oncology<sup>2</sup>, Sunnybrook Health Sciences Centre, Toronto, Canada; Institute for Clinical Evaluative Sciences, Toronto, Canada<sup>3</sup>; Dalla Lana School of Public Health, University of Toronto, Toronto, Canada<sup>4</sup>; Institute of Health Policy Management and Evaluation, University of Toronto, Toronto, Canada<sup>5</sup>; Cancer Care Ontario, Toronto, Canada<sup>6</sup>; Department of General Surgery and Li Ka Shing Knowledge Institute, St. Michael's Hospital, Toronto, Canada<sup>7</sup>.

Corresponding Author Information:

Jill Tinmouth MD PhD FRCPC

Sunnybrook Health Sciences Centre

2075 Bayview Ave Rm HG40

Toronto ON M4N 3M5

416 480-5910 t

416 480-4845 f

[jill.tinmouth@sunnybrook.ca](mailto:jill.tinmouth@sunnybrook.ca)**Email addresses of authors:**

Nancy N. Baxter

[BaxterN@smh.toronto.on.ca](mailto:BaxterN@smh.toronto.on.ca)

Lawrence F. Paszat

[lawrence.paszat@ices.on.ca](mailto:lawrence.paszat@ices.on.ca)

Linda Rabeneck

[Linda.Rabeneck@cancercare.on.ca](mailto:Linda.Rabeneck@cancercare.on.ca)

Rinku Sutradhar

[Rinku.Sutradhar@ices.on.ca](mailto:Rinku.Sutradhar@ices.on.ca)

Lingsong Yun

[Lingsong.Yun@ices.on.ca](mailto:Lingsong.Yun@ices.on.ca)

**Word count:** ~~2637-3211~~ (main text), ~~264~~2 (abstract)

1  
2  
3  
4  
5  
6  
7  
8  
9  
10  
11  
12  
13  
14  
15  
16  
17  
18  
19  
20  
21  
22  
23  
24  
25  
26  
27  
28  
29  
30  
31  
32  
33  
34  
35  
36  
37  
38  
39  
40  
41  
42  
43  
44  
45  
46  
47  
48  
49  
50  
51  
52  
53  
54  
55  
56  
57  
58  
59  
60

Tinmouth et al.  
Physician-linked mailed invitations for colorectal cancer screening

**Number of Tables:** 4

**Number of Figures:** 1

**Number of References:** 40

**Key words:** Mailed invitations, colorectal cancer, organized screening

For peer review only

Tinmouth et al.  
Physician-linked mailed invitations for colorectal cancer screening

## ABSTRACT

**Objectives:** A central tenet of organized cancer screening is that all persons in a target population are invited. The aims of this study ~~we~~are to identify ~~patient~~participant and physician factors associated with response to mailed physician-linked invitations (Study 1) and to evaluate their effectiveness in an organized colorectal (CRC) screening program (Study 2).

**Design and setting:** Two ~~linked cohort~~ studies (Study 1 – cohort design and Study 2 – matched cohort design of Study 1 participants and a matched control group) conducted in context of Ontario's organized province-wide CRC screening program.

**Participants:** 102 family physicians and 11,302 associated eligible patients ~~participating from~~a technical evaluation ("the Pilot") of large scale mailed invitations for CRC screening were included. Matched controls were randomly selected using propensity scores from among eligible patients associated with family physicians in similar practice types as the Pilot physicians.

**Intervention:** Physician-linked mailed invitation to have CRC screening.

**Outcomes:** Uptake of fecal occult blood test (FOBT) within 6 months of mailed invitation (primary) and uptake of FOBT or colonoscopy within 6 months of mailed invitation (secondary).

**Results:** Factors significantly associated with uptake of FOBT included prior FOBT use, older ~~patient~~participant age, greater ~~patient~~participant co-morbidity and having a female

Tinmouth et al.  
Physician-linked mailed invitations for colorectal cancer screening

physician. In the matched analysis, Pilot ~~patient~~ participants were more likely to complete an FOBT (22% vs. 8%,  $p < 0.0001$ ) or an FOBT or colonoscopy (25% vs. 11%,  $p < 0.0001$ ) within 6 months of mailed invitation than matched controls. The number needed to invite to screen one additional person was 7.

Conclusions: Centralized large scale mailing of physician-linked invitations is both feasible and effective in an organized CRC screening program.

Tinmouth et al.  
Physician-linked mailed invitations for colorectal cancer screening

## ARTICLE SUMMARY

Strengths and limitations of this study:

- We describe the implementation and effectiveness of physician-linked invitations in an organized colorectal screening program that is characterized by a high level of primary care physician involvement and that operates in a context where opportunistic screening with colonoscopy is possible ~~have not yet been reported~~
- We have shown that centralized large scale mailing of physician-linked invitations is feasible and effective in this context
- We found that physician linked mailed invitations improve CRC screening participation by 14% such that 7 physician-linked invitations need to be mailed to screen one additional person
- We were limited to data found in Ontario health administrative databases; for example, we were not able to determine family history
- Findings are promising but require appropriate infrastructure in order to be implemented in other jurisdictions

Tinmouth et al.  
Physician-linked mailed invitations for colorectal cancer screening

## INTRODUCTION

Colorectal cancer (CRC) is the 3<sup>rd</sup> most common cancer and the 4<sup>th</sup> leading cause of cancer-related death worldwide.[1] [Fecal occult blood testing \(FOBT\)](#)[2-4] and flexible sigmoidoscopy[5-7] have been shown to decrease CRC mortality in randomized controlled trials.

Given these data, organized CRC screening programs[8] are being implemented worldwide.[9] On April 1 2008, Ontario launched Canada's first organized province-wide CRC screening program, ColonCancerCheck (CCC).[10] CCC has a dual strategy: through the primary care physician, FOBT is offered to people at average risk for CRC and colonoscopy to those at increased risk based on family history. The CCC program uses a non-rehydrated guaiac FOBT (Hema-Screen, Immunostics, Inc., NJ, USA) requiring 3 stool samples from separate stools. The only recommended dietary restriction is to avoid vitamin C for 3 days prior to and during the collection period.

[Approximately 75% of Ontario residents received their care via a patient enrolled model \(PEMs\) of care at the time of the study \(2009\).](#)[11] [PEMs comprise teams of family physicians who provide their enrolled patients with comprehensive health care and extended hours.](#)[12] [PEMs vary in terms of structure, services provided and remuneration \(varying from enhance fee-for-service to blended capitation\).](#) All Ontario physicians are remunerated for preventive care such as CRC screening however, PEM

Tinmouth et al.  
Physician-linked mailed invitations for colorectal cancer screening

physicians are incented to a greater degree than those who are not in PEMs.  
Specifically, PEM physicians receive a \$7/patient fee for FOBT Distribution and  
Counseling, a \$6.86/patient fee for CRC Screening Management and an annual  
Colorectal Cancer Screening Preventive Care Bonus (\$220 to \$4000) depending on the  
proportion of enrolled patients who are up-to-date with FOBT (15-70%). The physician  
is entitled to the CRC Screening Management fee if the enrolled patient attends an  
appointment to discuss CRC screening, has declined the test verbally or in writing or  
there has been no response after 2 written notices and a telephone call from the  
physician.[13]

Formatted: Font: Arial Narrow, 12 pt, Not Bold

A central tenet of organized screening programs is that all persons in the target population be invited to participate.[8] ~~Operationalization-Implementation~~ of this ~~strategy~~ aspect of organized screening can vary: invitations may be sent with an FOBT kit, can include physician recommendation or may incorporate tailored messaging.[14 ,15] Some of these approaches, such as incorporation of physician recommendation, present significant implementation challenges for organized screening programs such as Ontario's.

In 2009, the CCC program conducted the CCC Invitation Pilot (the "Pilot"), an evaluation that tested the technical feasibility of a centralized approach to sending physician-linked mailed invitations for CRC screening. ~~In~~ this paper, we describe the structure and the implementation of the Pilot. In addition, we report on ~~patient~~participant and physician

Tinmouth et al.  
Physician-linked mailed invitations for colorectal cancer screening

factors associated with response to mailed physician-linked invitations and on the effectiveness of these invitations in an organized CRC screening program.

## METHODS

### The CCC Invitation Pilot – Implementation and Evaluation

The Pilot was conducted by CCC in November 2009 in order to develop and test the technical infrastructure required for large scale centralized physician-linked mailed invitations in Ontario. For the Pilot, invitation letters were generated by the CCC program on behalf of 102 family physicians and sent to all their eligible enrolled patients.

Just over 11,000 ~~eligible patient patients-participants received-were sent~~ mailed invitations requesting they visit their family physician to obtain an FOBT kit or, if appropriate based on family history, a referral for colonoscopy. In this paper, we report on ~~the 2 linked quantitative studies done~~ using this cohort. Study 1 examines participant and physician factors associated with response to the mailed invitation among those who were sent the mailed invitation. Study 2 evaluates the effectiveness of the mailed invitation by comparing uptake of CRC screening among Study 1 participants compared to a matched control group. Ethics approval was obtained from the research ethics boards at Sunnybrook Health Sciences Centre and the Institute for Clinical Evaluative Sciences (ICES) and permission to use the Pilot data was obtained from Cancer Care Ontario's (CCO) Data Access Committee. All analyses were conducted using SAS v.9



Tinmouth et al.  
Physician-linked mailed invitations for colorectal cancer screening

(SAS Institute, Cary, NC). A p-value of 0.05 was used to determine statistical significance.

### Data Sources

The ~~quantitative~~ Pilot study was conducted at ICES, which ~~holds~~ houses the administrative health records for all 12.4 million Ontarians. CCC program databases were linked to the ICES administrative databases using an encrypted version of the provincial health insurance number.

The ICES databases used include the Canadian Institute of Health Information (CIHI) databases, the Ontario Health Insurance Program (OHIP) Claims History Database, the Registered Persons Database (RPDB), the Ontario Cancer Registry, the ICES Physician Database, and the Client Agency Program Enrollment (CAPE) registry. The CIHI, OHIP, RPDB and the Ontario Cancer Registry and the ICES Physician Database have been previously described.[16 , 17] The CAPE registry tracks patients enrolled to physicians who participate in PEMs and is a centralized electronic record of the linkage between specific patients and their physicians. ~~registered to a specific physician in patient enrolled models (PEMs) of care. PEMs comprise family physicians who provide enrolled patients with comprehensive health care and extended hours; PEM physicians receive incentives for the use of preventive care measures such as CRC screening.[15] PEMs vary in terms of structure, services provided and remuneration (varying from enhance~~

Tinmouth et al.  
Physician-linked mailed invitations for colorectal cancer screening

~~fee for service to blended capitation). It is estimated that 75% of Ontario residents received their care via a PEM in 2009.[16].~~

The CCC program has collected data on CRC screening since its inception using Laboratory Reporting Tool (LRT) and comprises data related to the FOBT kits administered by the CCC program, including the results of these tests.

### Study 1: Factors associated with response to the mailed invitation

Cohort Definition: For the Pilot, a convenience sample of physicians participating in PEM-type practices was recruited via ~~Cancer Care Ontario~~CCC's Provincial Primary Care Cancer Network. ~~Prior to the Pilot mailing, CCC generated lists of patients eligible for CRC screening for each participating physician using CAPE, Ontario Cancer Registry, OHIP, CIRT and LRT. Patient~~Patients enrolled to these physicians,s aged 50 to 74 years without a history of CRC and who were due for CRC screening (without a record of recent FOBT (previous two years) or lower GI investigation including flexible sigmoidoscopy and colonoscopy (previous 5 years)), were eligible. For the Pilot mailing, CCC generated lists of patient participants eligible for CRC screening for each participating physician using CAPE, Ontario Cancer Registry, OHIP, CIRT and LRT. All persons who were sent an invitation were included in the cohort, regardless of whether the letter was returned to the sender.

Tinmouth et al.  
Physician-linked mailed invitations for colorectal cancer screening

The Mailing: Invitations were mailed in November 2009. The date of mailing was the index date. The letters were compiled centrally by the CCC program but were physician-linked; ~~patient~~patient participants ~~received-were sent~~ a letter from their own physician, as indicated by their name at the bottom of the letter in an italicized font (Figure 1). The letter asked ~~patient~~participants to visit their family physician for screening; it did not include an FOBT kit. The ~~letter wasy-were~~ accompanied by an CRC screening information brochure and sent in an envelope with the family physician name in the front upper left corner. For the purposes of the study, Pilot physicians were compensated an equivalent amount to the CRC Screening Management fee (\$6.86 per eligible enrolled patient) as Ontario PEM physicians are eligible for this fee for contacting the patient by mail regarding CRC screening.

Response to Mailed Invitation: We ~~defined-used a broad definition of~~ response to the mailed invitation; ~~as-any~~ record of FOBT in either OHIP or in LRT\_ within 6 months of the index date—, regardless of result (including rejected kits). Up to 10% of FOBT done in the province are captured only through OHIP, which does not have data on test results. We were not able to measure response in persons at increased risk of CRC as we do not have family history data available in the administrative databases.

PatientParticipant and Physician Factors: We characterized ~~patient~~participants by age group, sex, co-morbidity, median neighborhood income[18 , 19], health region[20],

Tinmouth et al.  
Physician-linked mailed invitations for colorectal cancer screening

immigration status, and prior FOBT. Comorbidity was measured by counting the number of Aggregated Diagnosis Groups (ADGs) in the prior 12 months according to the Johns Hopkins ACG<sup>®</sup> Case-Mix System.[21] This system has been shown to accurately predict mortality in a general population ambulatory cohort in Ontario.[22] We used date of registration in the RPDB as a proxy measure for immigration status; ~~patient~~ participants were considered recent immigrants if their date of registration was within 5 years of the index date.[23]

Physicians were characterized according to age, sex, training location (attended Canadian medical school vs. outside of Canada), practice type, size of practice, age-eligible rate of colonoscopy or FOBT over prior 2 years as well as the age-eligible rate of annual physical exams or influenza vaccinations in the prior year. All physicians were in PEMs; practice types included family health groups (FHGs, enhanced fee-for-service models), family health organizations or networks (FHO/FHNs, blended capitation models), FHO/FHN with family health team (FHO/FHN-FHT, interprofessional team model with a blended capitation fee structure) and other PEMs.[24] We measured practice size as the number of enrolled patients stratified in a binary fashion ( $\leq 1800$  vs.  $> 1800$  enrolled patients) as larger practice sizes have been shown to be associated with poorer preventative care.[25] For the remaining physician characteristics, we identified all enrolled and non-enrolled patients aged 50-74 years in their practices as of the index date. Age-eligible FOBT and colonoscopy rates were obtained for each Pilot physician

Tinmouth et al.  
Physician-linked mailed invitations for colorectal cancer screening

by calculating the proportion of their age-eligible patients -who had had an FOBT or colonoscopy in the 2 years prior to the index date. Similarly, we calculated their rates of age-eligible annual physical exams or influenza vaccine in the year prior to the index date. These variables were derived in order to estimate physician adherence to CRC screening and preventive medicine practices at baseline.

Analysis: The number and proportion of persons in the cohort who responded to the mailed invitation within 6 months were determined overall and by patient and physician characteristics. Multivariate logistic regression modeling was used to identify patient and physician factors associated with response to the mailed invitation. In order to account for potential clustering of patients within physicians, Generalized Estimating Equations (GEE) were used in the model.

## Study 2: Evaluation of the effectiveness of mailed invitations

Overview and study participants: This was a matched double cohort analysis, comparing uptake of FOBT in those who received a mailed invitation (Pilot cohort) to a matched control group who were not sent a mailed invitation. The control group comprised patients who were enrolled to PEM physicians who had not participated in the Pilot. Control participants received "usual care" for the CCC program in terms of screening promotion. As such, they received screening via their primary care physician who were eligible for the same financial incentives as Pilot physicians. Control

Tinmouth et al.  
Physician-linked mailed invitations for colorectal cancer screening

participants were not sent a centralized physician-linked invitation from the CCC program although their physicians could send them a mailed invitation at their own discretion.

The Pilot cohort comprised all members of the cohort described in Study 1 for whom a matched control could be identified. We identified potential ~~patient~~ controls as follows:

1) Pilot physicians were matched to non-Pilot physicians who were also practicing in PEMs in a 1:5 ratio using physician age, sex, size and practice type; 2) individuals enrolled ~~patients belonging~~ to the selected control physicians were retained if they met the same inclusion/exclusion criteria as those in the intervention cohort (aged 50 to 74 years with no prior CRC who were due for CRC screening). As with the identification of eligible participants in the Pilot, we used CAPE, Ontario Cancer Registry, OHIP, CIRT and LRT to determine eligibility of potential control participants.

Propensity scores that modeled the probability of belonging to the Pilot group were calculated for each ~~patient~~ participant in the entire group (Pilot and control). The variables in this model included age (as a continuous measure), sex, co-morbidity, median neighborhood income quintile, health region, immigration status, and FOBT from 2 to 5 years prior.[26 ,27] Pilot ~~patient~~ participants were matched to controls in a 1:1 fashion based on propensity scores using a caliper width of 0.25. This methodology was

Tinmouth et al.  
Physician-linked mailed invitations for colorectal cancer screening

implemented to balance the distribution of ~~patient~~participant-level variables between the Pilot and control groups.

Response to mailed invitation: For our primary outcome, we defined response to the mailed invitation as ~~above~~in Study 1, a record of FOBT regardless of result, within 6 months of the index date. For our secondary outcome, response was defined as a record of either FOBT or colonoscopy (~~in OHIP~~) within 6 months of the index date. For the purposes of this study, controls were assigned the same index date as their matched counterpart in the Pilot group.

Analysis: Standard differences between the Pilot participants and controls were calculated for the variables included in the propensity score. Important differences between the 2 groups were defined by a standardized difference exceeding -0.1.[27 ,28] In the primary analysis, we compared the number and proportion in the Pilot and control groups responding to the mailed invitation with FOBT using McNemar's test.[27] We determined the number of invitations mailed in order to screen one additional person with FOBT. We repeated the above analyses using our secondary outcome in order to determine if observed differences in FOBT uptake could be attributed to ~~a~~ differences in colonoscopy uptake (i.e., ~~patient~~participants had CRC screening but chose colonoscopy

Tinmouth et al.  
Physician-linked mailed invitations for colorectal cancer screening

over FOBT). As the matching only accounted for ~~patient~~participant-level variables, we repeated our analyses using conditional logistic regression in order to adjust for physician covariates (age, sex, practice type and size).

## RESULTS

### Study 1: Factors associated with response to the mailed invitation

There were 11,311 eligible ~~patient~~participants associated with the 102 family physicians in the Pilot cohort. Nine ~~patient~~participants were excluded as we were unable to determine their health region and/or income quintile; this left 11,302 ~~patient~~participants for the analysis. The majority of ~~patient~~participants were 50 to 59 years of age, 52% were women, 48% had no or low co-morbidity and 14% had completed an FOBT from 2 to 5 years prior to the mailing. Two thirds of ~~patient~~participants had a male physician, approximately half were part of a primary care team reimbursed via an enhanced fee-for-service arrangement and just under half were enrolled in larger practices (>1800 enrolled patients) (Table 1).

2503 (22%) completed an FOBT within 6 months of mailing. In the multivariate regression, the strongest ~~patient~~participant factor associated with FOBT completion was prior FOBT use (2 to 5 years prior vs. > 5 years or never: OR 2.8, 95% C.I.: 2.5 to 3.3,  $p < 0.0001$ ). Other significant factors associated with FOBT completion included older ~~patient~~participant age, greater co-morbidity, and having a female physician (Table 2).



Tinmouth et al.  
Physician-linked mailed invitations for colorectal cancer screening

## Study 2: Evaluation of the effectiveness of mailed invitations

Of the 11,302 patientparticipants in Study 1, 10,652 patients were successfully matched to 10,652 controls using propensity scores. Standardized differences for the patientparticipant characteristics included in the propensity score were all <0.1, indicating that the two cohorts were well matched for measurable potential confounders (Table 3).

Pilot patientparticipants were significantly more likely than controls to complete FOBT alone (2387 (22%) versus 854 (8%),  $p<0.0001$ ) and FOBT or colonoscopy (2664 (25%) vs. 1191 (11%),  $p<0.0001$ ) within 6 months of mailing. The association between the mailed invitation and CRC screening participation (either FOBT alone or FOBT or colonoscopy) remained after adjusting for physician level characteristics (Table 4).

## DISCUSSION

In the current study, we have demonstrated that physician-linked mailed invitations are both feasible and effective in the context of a large organized, population-based screening program; only 7 letters would need to be sent in order to screen one additional person. Furthermore, we have found that older patientparticipants, those with greater co-morbidity, those who have previously been screened and patients of those with female physicians were more likely to respond to this type of invitation. Our findings are

Tinmouth et al.  
Physician-linked mailed invitations for colorectal cancer screening

of particular interest to other jurisdictions planning or who already have organized CRC screening.

In other published studies of mailed invitations, an FOBT kit is often included with the invitation. Three studies done outside organized screening programs have found physician-linked invitations superior to non-linked invitations; 2 of these studies of invitations included an FOBT kit,[29 ,30] and the third study did not.[31] -Other studies have examined mailed invitations with FOBT kits in the context of primary care practices in the USA.[32-34] -While the results from these trials were largely supportive of mailed invitations, kit inclusion can make it difficult to separate the convenience of receiving the FOBT kit directly by mail from the impact of an invitation from one's own physician.

Our study demonstrates the effectiveness and feasibility of physician-linked invitations in the context of a large organized CRC screening program with an estimated target population of over 3 million persons. Implementation in this context confers challenges in terms of technological infra-structure, privacy and regulatory issues. There are 2 studies (from the United Kingdom[35] and Italy[36]) that have reported on mailed invitations in the context of organized colorectal cancer screening programs and found them to be effective. Both studies included FOBT kits and one studied the impact of physician endorsement specifically.[35] Our findings are important because they support a

Tinmouth et al.  
Physician-linked mailed invitations for colorectal cancer screening

potentially more cost-effective approach that avoids wasting kits that are mailed but not used.

Our results highlight the critical role of physician recommendation, a finding supported by others. For example, in the NHS Bowel Cancer Screening Programme (BCSP) currently, the primary care physician receives the result but is not directly involved in the mailed invitation or the actual screening. Recently, a randomized controlled trial conducted in the context of the BCSP showed that an endorsement letter from the primary care provider increased participation by 6%.<sup>[35]</sup> In 2 studies from Australia, endorsement improved initial participation<sup>[29,30]</sup> and over 4 successive screening rounds.<sup>[30]</sup>

[Uptake of FOBT in Ontario is lower than some organized CRC screening programs in other countries. For example, 30% of Ontarians were up-to-date with FOBT in 2008-9 \[37\] compared to 52% participation in the United Kingdom program by October 2008,\[38\] 54% in the Italian program in 2007,\[39\] and 54% in the New Zealand pilot program in 2012.\[40\] However, in the latter countries, there is very little, if any, opportunistic CRC screening using colonoscopy whereas Ontario's program operates in a hybrid environment where opportunistic colonoscopy is available as the initial screening test in persons at average risk. It has been noted that uptake of FOBT may be lower in settings, such as Ontario's or Australia's,\[41\] where opportunistic screening is](#)

Formatted: Font: Arial Narrow

Formatted: Font: Arial Narrow

Tinmouth et al.  
Physician-linked mailed invitations for colorectal cancer screening

available.[42] The findings from the current study indicate that physician-linked invitations for CRC screening can be effective in increasing uptake of FOBT in programs that operate in the context of opportunistic colonoscopy for average risk screening.

Our study has several limitations. As mentioned above, we are unable to determine family history using Ontario administrative data. A second limitation is that a single generic letter was used. Tailored letters with key messages for specific subgroups may be more effective,[15] an approach - finding that may be relevant in Ontario as we did find that response to the letter appeared to differ in various subgroups.

Finally Additionally, while our findings are promising, there are challenges to widespread implementation in other population-based screening programs, including the requirement for a centralized database that links patients and to their physicians. Finally, implementation of this strategy in population based screening is predicated on physician acceptability and agreement. While we have found that this approach is acceptable in principle to many Ontario physicians,[43] processes to determine confirm individual physician agreement have not been worked out determined for the entire CCC program which comprises an estimated 7000 primary care physicians.

## CONCLUSIONS

In summary, we have demonstrated that physician-linked mailed invitations for CRC screening, even without the inclusion of an FOBT kit, can have substantial effect on

Tinmouth et al.  
Physician-linked mailed invitations for colorectal cancer screening

participation in an organized CRC screening program and that it is technically feasible to centrally organize and mail physician-linked invitations on a large scale. Organized screening programs, which often use unlinked invitations, should consider adopting this approach given its demonstrated effectiveness and feasibility.

### ACKNOWLEDGEMENTS

The authors would like to acknowledge Peter Austin PhD for his expert statistic advice.

They also wish to acknowledge the support of the Institutes for Clinical Evaluative

Sciences, the Ontario Ministry of Health and Long Term Care and ~~Cancer Care Ontario~~ CCO. The opinions, results and conclusions reported in this paper are those of the authors and are independent from the funding sources. No endorsement by Institutes for Clinical Evaluative Sciences, the Ontario Ministry of Health and Long Term Care and ~~Cancer Care Ontario~~ CCO is intended or should be inferred.

### COMPETING INTERESTS STATEMENT

Dr. Tinmouth is the Lead Scientist for the ColonCancerCheck program and Dr. Rabeneck oversees the ColonCancerCheck program in her capacity as the Vice-President, Cancer Prevention and Control at ~~Cancer Care Ontario~~ CCO. None of the other authors have any conflicts of interest to report.

### FUNDING STATEMENT

Tinmouth et al.  
Physician-linked mailed invitations for colorectal cancer screening

This study was conducted with the support of the Ontario Institute for Cancer Research and ~~Cancer Care Ontario~~CCO's Health Services Research Network, which is independent of the ColonCancerCheck program, provided funding for this work. This work was also supported in part by a grant from the Canadian Institutes for Health Research (grant # CST-85478). Dr. Tinmouth was supported by a Canadian Institutes of Health Research New Investigator Award during the period of this study.

#### **AUTHOR CONTRIBUTION:**

Authors contributed substantially to each of the following areas:

-conception and design (JT, LFP, LR) or analysis and interpretation of data (JT, NB, LFP, LR, RS, LY)

-drafting the article (JT) or revising it critically for important intellectual content (JT, NB, LFP, LR, RS, LY)

-final approval of the version to be published (JT, NB, LFP, LR, RS, LY)

Tinmouth et al.  
Physician-linked mailed invitations for colorectal cancer screening

## REFERENCES

1. Center MM, Jemal A, Ward E. International trends in colorectal cancer incidence rates. *Cancer Epidemiol. Biomarkers Prev.* 2009;**18**(6):1688-94.
2. Mandel JS, Church TR, Bond JH, et al. The effect of fecal occult-blood screening on the incidence of colorectal cancer. *N. Engl. J. Med.* 2000;**343**(22):1603-7.
3. Hardcastle JD, Chamberlain JO, Robinson MH, et al. Randomised controlled trial of faecal-occult-blood screening for colorectal cancer. *Lancet* 1996;**348**(9040):1472-7.
4. Kronborg O, Fenger C, Olsen J, et al. Randomised study of screening for colorectal cancer with faecal-occult-blood test. *Lancet* 1996;**348**(9040):1467-71.
5. Atkin WS, Edwards R, Kralj-Hans I, et al. Once-only flexible sigmoidoscopy screening in prevention of colorectal cancer: a multicentre randomised controlled trial. *Lancet* 2010;**375**(9726):1624-33.
6. Segnan N AP, Bonelli L, Risio M, Sciallero S, Zappa M, Andreoni B, Arrigoni A, Bisanti L, Casella C, Crosta C, Falcini F, Ferrero F, Giacomini A, Giuliani O, Santarelli A, Visioli CB, Zanetti R, Atkin WS, Senore C, and the SCORE Working Group. Once-Only Sigmoidoscopy in Colorectal Cancer Screening: Follow-up Findings of the Italian Randomized Controlled Trial—SCORE. *J. Natl. Cancer Inst.* 2011;**103**(17):1310-22.
7. Schoen RE, Pinsky PF, Weissfeld JL, et al. Colorectal-cancer incidence and mortality with screening flexible sigmoidoscopy. *N. Engl. J. Med.* 2012;**366**(25):2345-57.
8. Miles A, Cockburn J, Smith RA, et al. A Perspective from Countries Using Organized Screening Programs. *Cancer* 2004;**104**(5 Suppl):1201-13.
9. International Cancer Screening Network. Inventory of Colorectal Cancer Screening Activities in ICSN Countries, May 2008. Last update: Feb 9 2009 2009. <http://appliedresearch.cancer.gov/icsn/colorectal/screening.html>.
10. Anonymous. Colon Cancer Check: Ontario's colorectal cancer screening program. Last update: Feb 2, 2012. <http://health.gov.on.ca/en/public/programs/coloncancercheck/>.
11. Glazier RH, Zagorski BM, Rayner J. Comparison of Primary Care Models in Ontario by Demographics, Case Mix and Emergency Department Use, 2008/09 to 2009/10. ICES Investigative Report. Toronto: Institute for Clinical Evaluative Sciences, 2012.
12. HealthForceOntario. Family Practice Models. Last update: May 3 2013. [http://www.healthforceontario.ca/Work/OutsideOntario/PhysiciansOutsideOntario/PractisingInOntario/family\\_practice\\_models.aspx](http://www.healthforceontario.ca/Work/OutsideOntario/PhysiciansOutsideOntario/PractisingInOntario/family_practice_models.aspx).
13. Ontario Ministry of Health and Long-Term Care. Bulletin 4482: ColonCancerCheck Physician Incentives. . Last update: July 22, 2008. <http://www.health.gov.on.ca/en/pro/programs/ohip/bulletins/4000/bul4482.pdf>.

Formatted: Space After: 0 pt

Tinmouth et al.

Physician-linked mailed invitations for colorectal cancer screening

14. Khalid-de Bakker C, Jonkers D, Smits K, et al. Participation in colorectal cancer screening trials after first-time invitation: a systematic review. *Endoscopy* 2011;**43**(12):1059-86.
15. Rawl SM, Skinner CS, Perkins SM, et al. Computer-delivered tailored intervention improves colon cancer screening knowledge and health beliefs of African-Americans. *Health Educ. Res.* 2012;**27**(5):868-85.
16. Alharbi O, Rabeneck L, Sutradhar R, et al. A population-based analysis of outpatient colonoscopy in adults assisted by an anesthesiologist. *Anesthesiology* 2009;**111**(4):734-40.
17. Robles SC, Marrett LD, Clarke EA, et al. An application of capture-recapture methods to the estimation of completeness of cancer registration. *J. Clin. Epidemiol.* 1988;**41**(5):495-501.
18. Alter DA, Naylor CD, Austin P, et al. Effects of socioeconomic status on access to invasive cardiac procedures and on mortality after acute myocardial infarction. *N. Engl. J. Med.* 1999;**341**(18):1359-67.
19. Singh SM, Paszat LF, Li C, et al. Association of socioeconomic status and receipt of colorectal cancer investigations: a population-based retrospective cohort study. *Can. Med. Assoc. J.* 2004;**171**(5):461-5.
20. Anonymous. Ontario's Local Health Integration Networks. Last update: May 30 2013 2013. <http://www.lhins.on.ca/home.aspx>.
21. Anonymous. The Johns Hopkins University ACG Case-Mix System. Last update: 2012. <http://www.acg.jhsph.edu/>.
22. Austin PC, van Walraven C, Wodchis WP, et al. Using the Johns Hopkins Aggregated Diagnosis Groups (ADGs) to predict mortality in a general adult population cohort in Ontario, Canada. *Med. Care* 2011;**49**(10):932-9.
23. Ray JG, Vermeulen MJ, Schull MJ, et al. Results of the Recent Immigrant Pregnancy and Perinatal Long-term Evaluation Study (RIPPLES). 2007;**176**(10):1419-26.
24. Glazier RH, Klein-Geltink J, Kopp A, et al. Capitation and enhanced fee-for-service models for primary care reform: a population-based evaluation. *Can. Med. Assoc. J.* 2009;**180**(11):E72-E81.
25. Dahrouge S, Hogg WE, Russell G, et al. Impact of remuneration and organizational factors on completing preventive manoeuvres in primary care practices. *CMAJ* 2012;**184**(2):E135-43 doi: 10.1503/cmaj.110407.
26. D'Agostino RB, Jr. Propensity score methods for bias reduction in the comparison of a treatment to a non-randomized control group. *Stat. Med.* 1998;**17**(19):2265-81.
27. Austin PC. An Introduction to Propensity Score Methods for Reducing the Effects of Confounding in Observational Studies. *Multivariate behavioral research* 2011;**46**(3):399-424.



Tinmouth et al.  
Physician-linked mailed invitations for colorectal cancer screening

28. Normand ST, Landrum MB, Guadagnoli E, et al. Validating recommendations for coronary angiography following acute myocardial infarction in the elderly: a matched analysis using propensity scores. *J. Clin. Epidemiol.* 2001;**54**(4):387-98.
29. Cole SR, Young GP, Byrne D, et al. Participation in screening for colorectal cancer based on a faecal occult blood test is improved by endorsement by the primary care practitioner. *J. Med. Screen.* 2002;**9**(4):147-52.
30. Zajac IT, Whibley AH, Cole SR, et al. Endorsement by the primary care practitioner consistently improves participation in screening for colorectal cancer: a longitudinal analysis. *J. Med. Screen.* 2010;**17**(1):19-24.
31. Grazzini G, Castiglione G, Isu A, et al. Colorectal cancer screening by fecal occult blood testing: results of a population-based experience. *Tumori* 2000;**86**(5):384-8.
32. Myers RE, Sifri R, Hyslop T, et al. A randomized controlled trial of the impact of targeted and tailored interventions on colorectal cancer screening. *Cancer* 2007;**110**(9):2083-91.
33. Sequist TD, Zaslavsky AM, Marshall R, et al. Patient and physician reminders to promote colorectal cancer screening: a randomized controlled trial. *Arch. Intern. Med.* 2009;**169**(4):364-71.
34. Walsh JM, Salazar R, Terdiman JP, et al. Promoting use of colorectal cancer screening tests. Can we change physician behavior? *J Gen Intern Med* 2005;**20**(12):1097-101.
35. Hewitson P, Ward AM, Heneghan C, et al. Primary care endorsement letter and a patient leaflet to improve participation in colorectal cancer screening: results of a factorial randomised trial. *Br. J. Cancer* 2011;**105**(4):475-80.
36. Giorgi Rossi P, Grazzini G, Anti M, et al. Direct mailing of faecal occult blood tests for colorectal cancer screening: a randomized population study from Central Italy. *J. Med. Screen.* 2011;**18**(3):121-7 doi: 10.1258/jms.2011.011009.
37. Cancer Quality Council of Ontario. Colorectal Cancer Screening: Participation. . Last update: 2013.  
<http://www.csqi.on.ca/cms/one.aspx?portalId=258922&pageId=273238#.UijqNMakrmQ>.
38. Logan RF, Patnick J, Nickerson C, et al. Outcomes of the Bowel Cancer Screening Programme (BCSP) in England after the first 1 million tests. *Gut* 2012;**61**(10):1439-46.
39. Parente F, Boemo C, Ardizzoia A, et al. Outcomes and cost evaluation of the first two rounds of a colorectal cancer screening program based on immunochemical fecal occult blood test in northern Italy. *Endoscopy* 2013;**45**(1):27-34.
40. New Zealand Ministry of Health. Bowel Screening Pilot January to June 2012 results. Last update: 26 April 2013. <http://www.health.govt.nz/our-work/diseases-and-conditions/cancer-programme/bowel-cancer->

Tinmouth et al.

Physician-linked mailed invitations for colorectal cancer screening

[programme/bowel-screening-pilot/bowel-screening-pilot-results/bowel-screening-pilot-january-june-2012-results.](#)

41. Zajac IT, Flight I, Turnbull D, et al. Self-reported bowel screening rates in older Australians and the implications for public health screening programs. *The Australasian medical journal* 2013;**6**(8):411-7.
42. Moss SM, Ancelle-Park R, Brenner H. Evaluation and interpretation of screening outcomes. In: Patnick J, Segnan N, von Karsa L, eds. *European guidelines for quality assurance in colorectal cancer screening and diagnosis*. Luxembourg: International Agency for Research on Cancer 2010.
43. Tinmouth J, Ritvo P, McGregor SE, et al. ColonCancerCheck Primary Care Invitation Pilot project: family physician perceptions. *Can. Fam. Physician* 2012;**58**(10):e570-7.

Tinmouth et al.  
Physician-linked mailed invitations for colorectal cancer screening

## Tables.

Table 1. Patient participant and physician characteristics for Pilot participants in Study 1

|                                              | FOBT within 6 months<br>(n=2,503) | No FOBT within 6 months<br>(n=8,799) | Total<br>(n=11,302) |
|----------------------------------------------|-----------------------------------|--------------------------------------|---------------------|
| <b>Patient participant</b>                   |                                   |                                      |                     |
| Age group in years, No. (%)                  |                                   |                                      |                     |
| 50-59                                        | 1,279 (51%)                       | 5,384 (61%)                          | 6,663 (59%)         |
| 60-69                                        | 894 (36%)                         | 2,637 (30%)                          | 3,531 (31%)         |
| 70-74                                        | 330 (13%)                         | 778 (9%)                             | 1,108 (10%)         |
| Sex, No. (%)                                 |                                   |                                      |                     |
| Female                                       | 1,299 (52%)                       | 4,554 (52%)                          | 5,853 (52%)         |
| Male                                         | 1,204 (48%)                       | 4,245 (48%)                          | 5,449 (48%)         |
| Co-morbidity*, No. of ADGs (%)               |                                   |                                      |                     |
| 0                                            | 257 (10%)                         | 1,279 (15%)                          | 1,536 (14%)         |
| 1-2                                          | 828 (33%)                         | 3,044 (35%)                          | 3,872 (34%)         |
| 3-4                                          | 712 (28%)                         | 2,241 (25%)                          | 2,953 (26%)         |
| 5-6                                          | 393 (16%)                         | 1,224 (14%)                          | 1,617 (14%)         |
| 7+                                           | 313 (13%)                         | 1,011 (11%)                          | 1,324 (12%)         |
| Median neighborhood income quintile, No. (%) |                                   |                                      |                     |
| Rural                                        | 394 (16%)                         | 1,431 (16%)                          | 1,825 (16%)         |
| Low Urban                                    | 360 (14%)                         | 1,375 (16%)                          | 1,735 (15%)         |
| 2                                            | 402 (16%)                         | 1,418 (16%)                          | 1,820 (16%)         |
| 3                                            | 429 (17%)                         | 1,430 (16%)                          | 1,859 (16%)         |
| 4                                            | 432 (17%)                         | 1,552 (18%)                          | 1,984 (18%)         |
| High Urban                                   | 486 (19%)                         | 1,593 (18%)                          | 2,079 (18%)         |
| Health region, No. (%)                       |                                   |                                      |                     |
| Erie St.Clair                                | 125 (5%)                          | 337 (4%)                             | 462 (4%)            |
| South West                                   | 284 (11%)                         | 823 (9%)                             | 1,107 (10%)         |
| Waterloo Wellington                          | 76 (3%)                           | 251 (3%)                             | 327 (3%)            |
| Hamilton Niagara                             | 289 (12%)                         | 976 (11%)                            | 1,265 (11%)         |
| Central West                                 | 138 (6%)                          | 482 (5%)                             | 620 (5%)            |
| Mississauga Halton                           | 22 (1%)                           | 120 (1%)                             | 142 (1%)            |
| Toronto Central                              | 111 (4%)                          | 392 (4%)                             | 503 (4%)            |
| Central                                      | 24 (1%)                           | 177 (2%)                             | 201 (2%)            |
| Central East                                 | 361 (14%)                         | 1,282 (15%)                          | 1,643 (15%)         |
| South East                                   | 162 (6%)                          | 697 (8%)                             | 859 (8%)            |
| Champlain                                    | 219 (9%)                          | 676 (8%)                             | 895 (8%)            |
| North Simcoe-Muskoka                         | 77 (3%)                           | 188 (2%)                             | 265 (2%)            |
| North East                                   | 291 (12%)                         | 1,118 (13%)                          | 1,409 (12%)         |
| North West                                   | 324 (13%)                         | 1,280 (15%)                          | 1,604 (14%)         |

Tinmouth et al.  
Physician-linked mailed invitations for colorectal cancer screening

|                                                              |             |             |             |
|--------------------------------------------------------------|-------------|-------------|-------------|
| Recent immigrant, No. (%)                                    | 23 (1%)     | 88 (1%)     | 111 (1%)    |
| FOBT 2 to 5 years prior to mailing, No. (%)                  | 643 (26%)   | 905 (10%)   | 1,548 (14%) |
| <b>Physician</b>                                             |             |             |             |
| Median age in years (IQR)                                    | 52 (45-59)  | 53 (46-59)  | 52 (45-59)  |
| Sex, No. (%)                                                 |             |             |             |
| Female                                                       | 936 (37%)   | 3,044 (35%) | 3,980 (35%) |
| Male                                                         | 1,567 (63%) | 5,755 (65%) | 7,322 (65%) |
| Training location, No. (%)                                   |             |             |             |
| Outside Canada                                               | 312 (12%)   | 1,196 (14%) | 1,508 (13%) |
| In Canada                                                    | 2,191 (88%) | 7,603 (86%) | 9,794 (87%) |
| Practice type, No. (%)                                       |             |             |             |
| FHG                                                          | 1,082 (43%) | 4,266 (48%) | 5,348 (47%) |
| FHO/FHN                                                      | 432 (17%)   | 1,456 (17%) | 1,888 (17%) |
| FHO/FHN-FHT                                                  | 881 (35%)   | 2,620 (30%) | 3,501 (31%) |
| Other PEM                                                    | 108 (4%)    | 457 (5%)    | 565 (5%)    |
| Practice size (enrolled patients), No. (%)                   |             |             |             |
| >1800 patients                                               | 1,105 (44%) | 4,104 (47%) | 5,209 (46%) |
| Age-eligible rate of colonoscopy quintile, No. (%)           |             |             |             |
| Low                                                          | 485 (19%)   | 1,619 (18%) | 2,104 (19%) |
| 2                                                            | 548 (22%)   | 1,940 (22%) | 2,488 (22%) |
| 3                                                            | 637 (25%)   | 2,279 (26%) | 2,916 (26%) |
| 4                                                            | 477 (19%)   | 1,696 (19%) | 2,173 (19%) |
| High                                                         | 356 (14%)   | 1,265 (14%) | 1,621 (14%) |
| Age-eligible rate of FOBT quintile, No. (%)                  |             |             |             |
| Low                                                          | 487 (19%)   | 1,888 (21%) | 2,375 (21%) |
| 2                                                            | 504 (20%)   | 1,886 (21%) | 2,390 (21%) |
| 3                                                            | 533 (21%)   | 1,890 (21%) | 2,423 (21%) |
| 4                                                            | 522 (21%)   | 1,680 (19%) | 2,202 (19%) |
| High                                                         | 457 (18%)   | 1,455 (17%) | 1,912 (17%) |
| Age-eligible rate of annual physical exams quintile, No. (%) |             |             |             |
| Low                                                          | 496 (20%)   | 2,009 (23%) | 2,505 (22%) |
| 2                                                            | 490 (20%)   | 1,625 (18%) | 2,115 (19%) |
| 3                                                            | 472 (19%)   | 1,638 (19%) | 2,110 (19%) |
| 4                                                            | 509 (20%)   | 1,686 (19%) | 2,195 (19%) |
| High                                                         | 536 (21%)   | 1,841 (21%) | 2,377 (21%) |

Tinmouth et al.  
Physician-linked mailed invitations for colorectal cancer screening

| Age-eligible rate of influenza vaccine quintile, No. (%) |           |             |             |
|----------------------------------------------------------|-----------|-------------|-------------|
| Low                                                      | 548 (22%) | 1,997 (23%) | 2,545 (23%) |
| 2                                                        | 549 (22%) | 1,765 (20%) | 2,314 (20%) |
| 3                                                        | 435 (17%) | 1,930 (22%) | 2,365 (21%) |
| 4                                                        | 485 (19%) | 1,770 (20%) | 2,255 (20%) |
| High                                                     | 486 (19%) | 1,337 (15%) | 1,823 (16%) |

\*Co-morbidity scored using number of Aggregated Diagnosis Groups (ADGs) using the Johns Hopkins Case Mix System

FHG = family health group

FHO/FHN = family health organizations or networks

Other PEM = other patient enrolled model of care

FOBT = fecal occult blood test

peer review only

Tinmouth et al.  
Physician-linked mailed invitations for colorectal cancer screening

Table 2. Multivariate logistic regression analysis using Generalized Estimating Equations for the characteristics of **patientparticipants** and physicians associated with completing an FOBT within 6 months of the mailing date.

| <b>PatientParticipants</b>          | <b>Odds ratio (95% C.I.)</b> | <b>P-value</b> |
|-------------------------------------|------------------------------|----------------|
| Age group, years                    |                              |                |
| 50-59                               | 0.6 (0.5, 0.8)               | <.0001         |
| 60-69                               | 0.8 (0.7, 1.0)               | NS             |
| 70-74                               | Reference                    | N/A            |
| Sex                                 |                              |                |
| Female                              | 0.9 (0.9, 1.0)               | NS             |
| Male                                | Reference                    | N/A            |
| Co-morbidity*, No. of ADGs          |                              |                |
| 0                                   | 0.7 (0.6, 0.8)               | 0.0002         |
| 1-2                                 | 0.9 (0.7, 1.0)               | NS             |
| 3-4                                 | 1.0 (0.9, 1.2)               | NS             |
| 5-6                                 | 1.0 (0.9, 1.2)               | NS             |
| 7+                                  | Reference                    | N/A            |
| Median neighborhood income quintile |                              |                |
| Rural                               | 0.9 (0.7, 1.1)               | NS             |
| Low Urban                           | 0.9 (0.7, 1.0)               | NS             |
| 2                                   | 1.0 (0.8, 1.1)               | NS             |
| 3                                   | 1.0 (0.9, 1.1)               | NS             |
| 4                                   | 0.9 (0.8, 1.1)               | NS             |
| High Urban                          | Reference                    | N/A            |
| Health region                       |                              |                |
| Erie St.Clair                       | 1.3 (0.9, 1.8)               | NS             |
| South West                          | 0.9 (0.6, 1.4)               | NS             |
| Waterloo Wellington                 | 0.8 (0.6, 1.2)               | NS             |
| Hamilton Niagara                    | 0.9 (0.6, 1.2)               | NS             |
| Central West                        | 1.0 (0.7, 1.4)               | NS             |
| Mississauga Halton                  | 0.6 (0.3, 1.2)               | NS             |
| Toronto Central                     | 0.8 (0.6, 1.2)               | NS             |
| Central                             | 0.5 (0.4, 0.7)               | 0.0004         |
| South East                          | 0.8 (0.4, 0.7)               | NS             |
| Champlain                           | 1.0 (0.7, 1.4)               | NS             |
| North Simcoe-Muskoka                | 0.9 (0.6, 1.4)               | NS             |
| North East                          | 1.1 (0.7, 1.5)               | NS             |
| North West                          | 0.7 (0.5, 1.0)               | 0.03           |
| Central East                        | Reference                    | N/A            |
| Recency of immigration              |                              |                |
| Remote or non-immigrant             | 1.0 (0.6, 1.6)               | NS             |
| Recent immigrant                    | Reference                    | N/A            |
| Prior FOBT Use                      |                              |                |
| 2 to 5 years prior to mailing       | 2.8 (2.5, 3.3)               | <.0001         |

Tinmouth et al.  
Physician-linked mailed invitations for colorectal cancer screening

|                                                     |                |      |
|-----------------------------------------------------|----------------|------|
| > 5 years or never                                  | Reference      |      |
| <b>Physician</b>                                    |                |      |
| Increasing age (per year)                           | 1.0 (1.0, 1.0) | NS   |
| Sex                                                 |                |      |
| Female                                              | 1.3 (1.0, 1.5) | 0.02 |
| Male                                                | Reference      | N/A  |
| Training location                                   |                |      |
| In Canada                                           | 0.9 (0.7, 1.2) | NS   |
| Outside Canada                                      | Reference      | N/A  |
| Practice type                                       |                |      |
| FHG                                                 | 0.9 (0.7, 1.1) | NS   |
| FHO/FHN                                             | 0.8 (0.6, 1.1) | NS   |
| Other PEM                                           | 0.7 (0.4, 1.0) | 0.05 |
| FHO/FHN-FHT                                         | Reference      | N/A  |
| Practice size (enrolled patients)                   |                |      |
| ≤ 1800 patients                                     | 1.1 (0.9, 1.3) | NS   |
| > 1800 patients                                     | Reference      | N/A  |
| Age-eligible rate of colonoscopy quintile           |                |      |
| Low                                                 | 1.1 (0.8, 1.5) | NS   |
| 2                                                   | 1.2 (1.0, 1.6) | NS   |
| 3                                                   | 1.0 (0.8, 1.2) | NS   |
| 4                                                   | 1.0 (0.8, 1.3) | NS   |
| High                                                | Reference      | N/A  |
| Age-eligible rate of FOBT quintile                  |                |      |
| 2                                                   | 0.9 (0.6, 1.3) | NS   |
| 3                                                   | 0.9 (0.7, 1.2) | NS   |
| 4                                                   | 1.1 (0.8, 1.4) | NS   |
| High                                                | 0.9 (0.7, 1.3) | NS   |
| Low                                                 | Reference      | N/A  |
| Age-eligible rate of annual physical exams quintile |                |      |
| 2                                                   | 1.4 (0.9, 2.0) | NS   |
| 3                                                   | 1.3 (0.9, 1.8) | NS   |
| 4                                                   | 1.3 (0.9, 1.8) | NS   |
| High                                                | 1.1 (0.8, 1.5) | NS   |
| Low                                                 | Reference      | N/A  |
| Age-eligible rate of influenza vaccine quintile     |                |      |
| 2                                                   | 1.0 (0.8, 1.2) | NS   |
| 3                                                   | 0.8 (0.6, 1.0) | 0.02 |
| 4                                                   | 0.9 (0.7, 1.2) | NS   |
| High                                                | 1.3 (1.0, 1.7) | NS   |
| Low                                                 | Reference      | N/A  |

\*Co-morbidity scored using number of Aggregated Diagnosis Groups (ADGs) using the Johns Hopkins Case Mix System

FHG = family health group

FHO/FHN = family health organizations or networks

1  
2  
3  
4  
5  
6  
7  
8  
9  
10  
11  
12  
13  
14  
15  
16  
17  
18  
19  
20  
21  
22  
23  
24  
25  
26  
27  
28  
29  
30  
31  
32  
33  
34  
35  
36  
37  
38  
39  
40  
41  
42  
43  
44  
45  
46  
47  
48  
49  
50  
51  
52  
53  
54  
55  
56  
57  
58  
59  
60

Tinmouth et al.  
Physician-linked mailed invitations for colorectal cancer screening

Other PEM = other patient enrolled model of care  
NS = not significant  
N/A - not applicable  
FOBT = fecal occult blood test

For peer review only



Tinmouth et al.  
Physician-linked mailed invitations for colorectal cancer screening

Table 3. Characteristics of the 2 cohorts matched by propensity score in Study 2

|                                                 | Pilot participants<br>(n=10,652) | Control-patients<br>participants<br>(n=10,652) | Standardized<br>Difference* |
|-------------------------------------------------|----------------------------------|------------------------------------------------|-----------------------------|
| <b>ParticipantsPatients</b>                     |                                  |                                                |                             |
| Age group in years, No. (%)                     |                                  |                                                |                             |
| 50-59                                           | 6,248 (59%)                      | 6,324 (59%)                                    | 0.01                        |
| 60-69                                           | 3,342 (31%)                      | 3,316 (31%)                                    | 0.01                        |
| 70-74                                           | 1,062 (10%)                      | 1,012 (10%)                                    | 0.02                        |
| Sex, No. (%)                                    |                                  |                                                |                             |
| Female                                          | 5548 (52%)                       | 5477 (51%)                                     | 0.01                        |
| Male                                            | 5,104 (48%)                      | 5,175 (49%)                                    | 0.01                        |
| Co-morbidity**, No. of ADGs (%)                 |                                  |                                                |                             |
| 0                                               | 1,462 (14%)                      | 1,425 (13%)                                    | 0.01                        |
| 1-2                                             | 3,647 (34%)                      | 3,716 (35%)                                    | 0.01                        |
| 3-4                                             | 2,764 (26%)                      | 2,835 (27%)                                    | 0.02                        |
| 5-6                                             | 1,536 (14%)                      | 1,473 (14%)                                    | 0.02                        |
| 7+                                              | 1,243 (12%)                      | 1,203 (11%)                                    | 0.01                        |
| Median neighborhood income quintile,<br>No. (%) |                                  |                                                |                             |
| Rural                                           | 1,825 (17%)                      | 1,889 (18%)                                    | 0.02                        |
| Low Urban                                       | 1,628 (15%)                      | 1,699 (16%)                                    | 0.02                        |
| 2                                               | 1,698 (16%)                      | 1,728 (16%)                                    | 0.01                        |
| 3                                               | 1,728 (16%)                      | 1,681 (16%)                                    | 0.01                        |
| 4                                               | 1,831 (17%)                      | 1,753 (16%)                                    | 0.02                        |
| High Urban                                      | 1,942 (18%)                      | 1,902 (18%)                                    | 0.01                        |
| Health region, No. (%)                          |                                  |                                                |                             |
| Erie St.Clair                                   | 462 (4%)                         | 423 (4%)                                       | 0.02                        |
| South West                                      | 1,107 (10%)                      | 1,114 (10%)                                    | 0                           |
| Waterloo Wellington                             | 327 (3%)                         | 343 (3%)                                       | 0.01                        |
| Hamilton Niagara                                | 1,265 (12%)                      | 1,290 (12%)                                    | 0.01                        |
| Central West                                    | 620 (6%)                         | 580 (5%)                                       | 0.02                        |
| Mississauga Halton                              | 142 (1%)                         | 144 (1%)                                       | 0                           |
| Toronto Central                                 | 503 (5%)                         | 478 (4%)                                       | 0.01                        |
| Central                                         | 201 (2%)                         | 209 (2%)                                       | 0.01                        |
| Central East                                    | 1,643 (15%)                      | 1,702 (16%)                                    | 0.02                        |
| South East                                      | 859 (8%)                         | 891 (8%)                                       | 0.01                        |
| Champlain                                       | 895 (8%)                         | 904 (8%)                                       | 0                           |
| North Simcoe-Muskoka                            | 265 (2%)                         | 242 (2%)                                       | 0.01                        |
| North East                                      | 1,409 (13%)                      | 1,378 (13%)                                    | 0.01                        |
| North West                                      | 954 (9%)                         | 954 (9%)                                       | 0                           |
| Recent immigrant, No. (%)                       | 111 (1%)                         | 105 (1%)                                       | 0.01                        |
| FOBT 2 to 5 years prior to mailing, No.<br>(%)  | 1,476 (14%)                      | 1,240 (12%)                                    | 0.07                        |
| <b>Physician</b>                                |                                  |                                                |                             |

Tinmouth et al.  
Physician-linked mailed invitations for colorectal cancer screening

|                                            |             |             |     |
|--------------------------------------------|-------------|-------------|-----|
| Median age in years (IQR)                  | 52 (45-59)  | 52 (47-58)  | N/A |
| Sex, No. (%)                               |             |             |     |
| Female                                     | 3,875 (36%) | 3,335 (31%) | N/A |
| Male                                       | 6,777 (64%) | 7,317 (69%) |     |
| Practice type, No. (%)                     |             |             |     |
| FHG                                        | 4,854 (46%) | 4,885 (46%) |     |
| FHO/FHN                                    | 1,859 (17%) | 1,718 (16%) | N/A |
| FHO/FHN-FHT                                | 3,374 (32%) | 3,027 (28%) |     |
| Other PEM                                  | 565 (5%)    | 1,022 (10%) |     |
| Practice size (enrolled patients), No. (%) |             |             |     |
| >1800 patients                             | 5,366 (50%) | 5,026 (47%) | N/A |

\*Standardized differences for physician level variables not reported as propensity scores were estimated using patient level characteristics only

\*\*Co-morbidity scored using number of Aggregated Diagnosis Groups (ADGs) using the Johns Hopkins Case Mix System

FHG = family health group

FHO/FHN = family health organizations or networks

Other PEM = other patient enrolled model of care

FOBT = fecal occult blood test

Tinmouth et al.  
Physician-linked mailed invitations for colorectal cancer screening

Table 4. Association between mailed invitation and FOBT completion or mailed invitation and FOBT or colonoscopy completion after adjusting for physician factors.

|                                   | FOBT completion       |         | FOBT or Colonoscopy completion |         |
|-----------------------------------|-----------------------|---------|--------------------------------|---------|
|                                   | Odds ratio (95% C.I.) | P-value | Odds ratio (95% C.I.)          | P-value |
| Mailed invitation                 |                       |         |                                |         |
| Yes (Pilot)                       | 3.3 (3.1, 3.6)        | <.0001  | 2.7 (2.5, 2.9)                 | <.0001  |
| No (Controls)                     | Reference             | N/A     | Reference                      | N/A     |
| Increasing age (per year)         | 1.0 ( 1.0, 1.0)       | NS      | 1.0 (1.0, 1.0)                 | 0.03    |
| Sex, No. (%)                      |                       |         |                                |         |
| Female                            | 1.0 (0.9, 1.1)        | NS      | 1.0 (0.9, 1.1)                 | NS      |
| Male                              | Reference             | N/A     | Reference                      | N/A     |
| Practice type, No. (%)            |                       |         |                                |         |
| FHG                               | 0.7 (0.6, 0.8)        | <.0001  | 0.7 (0.7, 0.8)                 | <.0001  |
| FHO/FHN                           | 0.8 (0.7, 0.9)        | <.0001  | 0.8 (0.7, 0.9)                 | <.0001  |
| Other PEM                         | 0.8 (0.7, 1.0)        | 0.03    | 0.8 (0.7, 1.0)                 | NS      |
| FHO/FHN-FHT                       | Reference             | N/A     | Reference                      | N/A     |
| Practice size (enrolled patients) |                       |         |                                |         |
| ≤ 1800 patients                   | 1.2 (1.1, 1.3)        | 0.0004  | 1.2 (1.1, 1.3)                 | <.0001  |
| > 1800 patients                   | Reference             | N/A     | Reference                      | N/A     |

FHG = family health group

FHO/FHN = family health organizations or networks

Other PEM = other patient enrolled model of care

FOBT = fecal occult blood test

1  
2  
3  
4  
5  
6  
7  
8  
9  
10  
11  
12  
13  
14  
15  
16  
17  
18  
19  
20  
21  
22  
23  
24  
25  
26  
27  
28  
29  
30  
31  
32  
33  
34  
35  
36  
37  
38  
39  
40  
41  
42  
43  
44  
45  
46  
47  
48  
49  
50  
51  
52  
53  
54  
55  
56  
57  
58  
59  
60

Tinmouth et al.  
Physician-linked mailed invitations for colorectal cancer screening

Figure Legends

Figure 1. Mock-up of physician-linked invitation used in the Pilot.

For peer review only

From the office of Dr. George Black

June 1, 2009

Lawren Harris  
456 Superior Street  
Lindsay ON K2L 3M4

Dear Lawren Harris:

**You have received this letter because it is time to be screened for colon cancer.** Our records as of April 1<sup>st</sup>, 2009 show that you have never had a fecal occult blood test (FOBT) or we do not know when you had your last FOBT. All adults between the ages of 50 and 74 years who are at average risk for colon cancer should do a FOBT every two years.

If your parent, brother, sister or child has had colon cancer, your risk is higher and you should have a colonoscopy.

**Please call my office to set up an appointment to talk about your risk for colon cancer and which test is right for you.**

If you have recently completed colon cancer screening, please disregard this letter.

I look forward to hearing from you soon.

**Dr. George Black**  
705-555-1212

### GET THE FACTS. GET CHECKED.

- Colon cancer is the second most common cause of cancer death in Ontario
- Colon cancer can develop without any early warning signs.
- If it is caught early enough, 9 out of every 10 people can be cured.
- Regular screening is the best way to catch colon cancer early.
- The FOBT is a simple test that can be done at home.

For more information please visit [www.coloncancercheck.ca](http://www.coloncancercheck.ca)

This letter has been sent on my behalf by ColonCancerCheck (CCC), Ontario's colorectal cancer screening program. CCC is a collaborative initiative of the Ministry of Health and Long-Term Care and Cancer Care Ontario. If for any reason you do not wish to receive future correspondence from the program, simply call the ColonCancerCheck Information Line at 1-866-662-9233 during business hours.

Tinmouth et al., Physician-linked mailed invitation to be screened improves uptake in an organized colorectal cancer screening program.

|                              | Item No | Recommendation                                                                                                                                                                                                                                                                                                                                                                                                                                                                                                                                                                                                                                                                                           | Page                                                                                                                  | Comment                                                                     |
|------------------------------|---------|----------------------------------------------------------------------------------------------------------------------------------------------------------------------------------------------------------------------------------------------------------------------------------------------------------------------------------------------------------------------------------------------------------------------------------------------------------------------------------------------------------------------------------------------------------------------------------------------------------------------------------------------------------------------------------------------------------|-----------------------------------------------------------------------------------------------------------------------|-----------------------------------------------------------------------------|
| <b>Title and abstract</b>    | 1       | (a) Indicate the study's design with a commonly used term in the title or the abstract<br>(b) Provide in the abstract an informative and balanced summary of what was done and what was found                                                                                                                                                                                                                                                                                                                                                                                                                                                                                                            | 1, 3                                                                                                                  |                                                                             |
| <b>Introduction</b>          |         |                                                                                                                                                                                                                                                                                                                                                                                                                                                                                                                                                                                                                                                                                                          |                                                                                                                       |                                                                             |
| Background/ratio             | 2       | Explain the scientific background and rationale for the investigation being reported                                                                                                                                                                                                                                                                                                                                                                                                                                                                                                                                                                                                                     | 07-Jun                                                                                                                |                                                                             |
| Objectives                   | 3       | State specific objectives, including any prespecified hypotheses                                                                                                                                                                                                                                                                                                                                                                                                                                                                                                                                                                                                                                         | 7, first paragraph                                                                                                    |                                                                             |
| <b>Methods</b>               |         |                                                                                                                                                                                                                                                                                                                                                                                                                                                                                                                                                                                                                                                                                                          |                                                                                                                       |                                                                             |
| Study design                 | 4       | Present key elements of study design early in the paper                                                                                                                                                                                                                                                                                                                                                                                                                                                                                                                                                                                                                                                  | 7, paragraph 2                                                                                                        |                                                                             |
| Setting                      | 5       | Describe the setting, locations, and relevant dates, including periods of recruitment, exposure, follow-up, and data collection                                                                                                                                                                                                                                                                                                                                                                                                                                                                                                                                                                          | 7, paragraph 2                                                                                                        |                                                                             |
| Participants                 | 6       | (a) <i>Cohort study</i> —Give the eligibility criteria, and the sources and methods of selection of participants. Describe methods of follow-up<br><br><i>Case-control study</i> —Give the eligibility criteria, and the sources and methods of case ascertainment and control selection. Give the rationale for the choice of cases and controls<br><br><i>Cross-sectional study</i> —Give the eligibility criteria, and the sources and methods of selection of participants<br>(b) <i>Cohort study</i> —For matched studies, give matching criteria and number of exposed and unexposed<br><i>Case-control study</i> —For matched studies, give matching criteria and the number of controls per case | 9, paragraph 2,<br>10, paragraph 2<br>& 12, first<br>paragraph<br><br>n/a<br><br>n/a<br>12, first<br>paragraph<br>n/a |                                                                             |
| Variables                    | 7       | Clearly define all outcomes, exposures, predictors, potential confounders, and effect modifiers. Give diagnostic criteria, if applicable                                                                                                                                                                                                                                                                                                                                                                                                                                                                                                                                                                 | 9, 10 & 11                                                                                                            |                                                                             |
| Data sources/<br>measurement | 8*      | For each variable of interest, give sources of data and details of methods of assessment (measurement). Describe comparability of assessment methods if there is more than one group                                                                                                                                                                                                                                                                                                                                                                                                                                                                                                                     | 8, 9, 10 & 11                                                                                                         |                                                                             |
| Bias                         | 9       | Describe any efforts to address potential sources of bias                                                                                                                                                                                                                                                                                                                                                                                                                                                                                                                                                                                                                                                | 11, paragraph 2<br>& 13, paragraph                                                                                    |                                                                             |
| Study size                   | 10      | Explain how the study size was arrived at                                                                                                                                                                                                                                                                                                                                                                                                                                                                                                                                                                                                                                                                | 5, paragraph 1                                                                                                        |                                                                             |
| Quantitative<br>variables    | 11      | Explain how quantitative variables were handled in the analyses. If applicable, describe which groupings were chosen and why                                                                                                                                                                                                                                                                                                                                                                                                                                                                                                                                                                             |                                                                                                                       |                                                                             |
| Statistical<br>methods       | 12      | (a) Describe all statistical methods, including those used to control for confounding<br>(b) Describe any methods used to examine subgroups and interactions<br>(c) Explain how missing data were addressed<br><br>(d) <i>Cohort study</i> —If applicable, explain how loss to follow-up was addressed<br><br><i>Case-control study</i> —If applicable, explain how matching of cases and controls was addressed<br><i>Cross-sectional study</i> —If applicable, describe analytical methods taking account of sampling strategy<br>(e) Describe any sensitivity analyses                                                                                                                                | 11, paragraph 2<br>& 13, paragraph<br>n/a<br><br>14, first<br>paragraph<br><br>n/a<br><br>n/a<br>n/a                  | all patients followed through administrative data, therefore no loss to f/u |
| <b>Results</b>               |         |                                                                                                                                                                                                                                                                                                                                                                                                                                                                                                                                                                                                                                                                                                          |                                                                                                                       |                                                                             |
| Participants                 | 13*     | (a) Report numbers of individuals at each stage of study—eg numbers potentially eligible, examined for eligibility, confirmed eligible, included in the study, completing follow-up, and analysed<br><br>(b) Give reasons for non-participation at each stage                                                                                                                                                                                                                                                                                                                                                                                                                                            | 14, first & last<br>paragraphs<br><br>14, first & last<br>paragraphs                                                  |                                                                             |

|                          |     |                                                                                                                                                                                                              |                                       |
|--------------------------|-----|--------------------------------------------------------------------------------------------------------------------------------------------------------------------------------------------------------------|---------------------------------------|
|                          |     | (c) Consider use of a flow diagram                                                                                                                                                                           | n/a                                   |
| Descriptive data         | 14* | (a) Give characteristics of study participants (eg demographic, clinical, social) and information on exposures and potential confounders                                                                     | Table 1 & Table 3                     |
|                          |     | (b) Indicate number of participants with missing data for each variable of interest                                                                                                                          | 15, first paragraph                   |
|                          |     | (c) <i>Cohort study</i> —Summarise follow-up time (eg, average and total amount)                                                                                                                             | all followed up for 6 months          |
| Outcome data             | 15* | <i>Cohort study</i> —Report numbers of outcome events or summary measures over time                                                                                                                          | 15, 2nd paragraph & 16, 1st paragraph |
|                          |     | <i>Case-control study</i> — Report numbers in each exposure category, or summary measures of exposure                                                                                                        | n/a                                   |
|                          |     | <i>Cross-sectional study</i> —Report numbers of outcome events or summary measures                                                                                                                           | n/a                                   |
| Main results             | 16  | (a) Give unadjusted estimates and, if applicable, confounder-adjusted estimates and their precision (eg, 95% confidence interval). Make clear which confounders were adjusted for and why they were included | 15, 2nd paragraph, Tables 2 & 4       |
|                          |     | (b) Report category boundaries when continuous variables were categorized                                                                                                                                    | Tables 2 & 4                          |
|                          |     | (c) If relevant, consider translating estimates of relative risk into absolute risk for a meaningful time period                                                                                             | n/a                                   |
| Other analyses           | 17  | Report other analyses done—eg analyses of subgroups and interactions, and sensitivity analyses                                                                                                               | n/a                                   |
| <b>Discussion</b>        |     |                                                                                                                                                                                                              |                                       |
| Key results              | 18  | Summarise key results with reference to study objectives                                                                                                                                                     | 16, paragraph 1                       |
| Limitations              | 19  | Discuss limitations of the study, taking into account sources of potential bias or imprecision. Discuss both direction and magnitude of any potential bias                                                   | 18, 2nd paragraph                     |
| Interpretation           | 20  | Give a cautious overall interpretation of results considering objectives, limitations, multiplicity of analyses, results from similar studies, and other relevant evidence                                   | 17 & 18                               |
| Generalisability         | 21  | Discuss the generalisability (external validity) of the study results                                                                                                                                        | 18, last paragraph                    |
| <b>Other information</b> |     |                                                                                                                                                                                                              |                                       |
| Funding                  | 22  | Give the source of funding and the role of the funders for the present study and, if applicable, for the original study on which the present article is based                                                | 19, 20                                |



**Using physician-linked mailed invitations in an organized colorectal cancer screening program: effectiveness and factors associated with response.**

|                                 |                                                                                                                                                                                                                                                                                                                                                       |
|---------------------------------|-------------------------------------------------------------------------------------------------------------------------------------------------------------------------------------------------------------------------------------------------------------------------------------------------------------------------------------------------------|
| Journal:                        | <i>BMJ Open</i>                                                                                                                                                                                                                                                                                                                                       |
| Manuscript ID:                  | bmjopen-2013-004494.R2                                                                                                                                                                                                                                                                                                                                |
| Article Type:                   | Research                                                                                                                                                                                                                                                                                                                                              |
| Date Submitted by the Author:   | 04-Feb-2014                                                                                                                                                                                                                                                                                                                                           |
| Complete List of Authors:       | Tinmouth, Jill; Sunnybrook Health Sciences Centre, Baxter, Nancy; University of Toronto, St Michaels Hospital, Surgery Paszat, Lawrence; Institute for Clinical Evaluative Sciences, Rabeneck, Linda; University of Toronto, Sutradhar, Rinku; Institute for Clinical Evaluative Sciences, Yun, Lingsong; Institute for Clinical Evaluative Sciences, |
| <b>Primary Subject Heading</b>: | Gastroenterology and hepatology                                                                                                                                                                                                                                                                                                                       |
| Secondary Subject Heading:      | Oncology, Public health, General practice / Family practice, Health services research                                                                                                                                                                                                                                                                 |
| Keywords:                       | Gastrointestinal tumours < GASTROENTEROLOGY, PREVENTIVE MEDICINE, PRIMARY CARE, PUBLIC HEALTH                                                                                                                                                                                                                                                         |
|                                 |                                                                                                                                                                                                                                                                                                                                                       |

SCHOLARONE™  
Manuscripts

Only



**TITLE PAGE**

**Title:** Using physician-linked mailed invitations in an organized colorectal cancer screening program: effectiveness and factors associated with response.

**Short title:** Physician-linked invitations for colorectal cancer screening

**Authors:**

Jill Tinmouth<sup>1,3,5,6</sup>

Nancy N. Baxter<sup>3,5,7</sup>

Lawrence F. Paszat<sup>2,3,4</sup>

Linda Rabeneck<sup>1,3,4,5,6</sup>

Rinku Sutradhar<sup>3,4</sup>

Lingsong Yun<sup>3</sup>

**Affiliations:** Departments of Medicine<sup>1</sup> and Radiation Oncology<sup>2</sup>, Sunnybrook Health Sciences Centre, Toronto, Canada; Institute for Clinical Evaluative Sciences, Toronto, Canada<sup>3</sup>; Dalla Lana School of Public Health, University of Toronto, Toronto, Canada<sup>4</sup>; Institute of Health Policy Management and Evaluation, University of Toronto, Toronto, Canada<sup>5</sup>; Cancer Care Ontario, Toronto, Canada<sup>6</sup>; Department of General Surgery and Li Ka Shing Knowledge Institute, St. Michael's Hospital, Toronto, Canada<sup>7</sup>.

**Corresponding Author Information:**

Jill Tinmouth MD PhD FRCPC

Sunnybrook Health Sciences Centre

2075 Bayview Ave Rm HG40

Toronto ON M4N 3M5

416 480-5910 t

416 480-4845 f

[jill.tinmouth@sunnybrook.ca](mailto:jill.tinmouth@sunnybrook.ca)

**Email addresses of authors:**

Nancy N. Baxter [BaxterN@smh.toronto.on.ca](mailto:BaxterN@smh.toronto.on.ca)

Lawrence F. Paszat [lawrence.paszat@ices.on.ca](mailto:lawrence.paszat@ices.on.ca)

Linda Rabeneck [Linda.Rabeneck@cancercare.on.ca](mailto:Linda.Rabeneck@cancercare.on.ca)

Rinku Sutradhar [Rinku.Sutradhar@ices.on.ca](mailto:Rinku.Sutradhar@ices.on.ca)

Lingsong Yun [Lingsong.Yun@ices.on.ca](mailto:Lingsong.Yun@ices.on.ca)

**Word count:** 3159 (main text), 263 (abstract)

**Number of Tables:** 4

Tinmouth et al.

Physician-linked mailed invitations for colorectal cancer screening

1  
2  
3  
4  
5  
6  
7  
8  
9  
10  
11  
12  
13  
14  
15  
16  
17  
18  
19  
20  
21  
22  
23  
24  
25  
26  
27  
28  
29  
30  
31  
32  
33  
34  
35  
36  
37  
38  
39  
40  
41  
42  
43  
44  
45  
46  
47  
48  
49  
50  
51  
52  
53  
54  
55  
56  
57  
58  
59  
60

**Number of Figures:** 1

**Number of References:** 45

**Key words:** Mailed invitations, colorectal cancer, organized screening

For peer review only

**ABSTRACT**

Objectives: A central tenet of organized cancer screening is that all persons in a target population are invited. The aims of this study were to identify participant and physician factors associated with response to mailed physician-linked invitations (Study 1) and to evaluate their effectiveness in an organized colorectal (CRC) screening program (Study 2).

Design and setting: Two studies (Study 1 – cohort design and Study 2 – matched cohort design, comprising Study 1 participants and a matched control group) conducted in context of Ontario's organized province-wide CRC screening program.

Participants: 102 family physicians and 11,302 associated eligible patients from a technical evaluation ("the Pilot") of large scale mailed invitations for CRC screening were included. Matched controls were randomly selected using propensity scores from among eligible patients associated with family physicians in similar practice types as the Pilot physicians.

Intervention: Physician-linked mailed invitation to have CRC screening.

Outcomes: Uptake of fecal occult blood test (FOBT) within 6 months of mailed invitation (primary) and uptake of FOBT or colonoscopy within 6 months of mailed invitation (secondary).

Results: Factors significantly associated with uptake of FOBT included prior FOBT use, older participant age, greater participant co-morbidity and having a female physician. In

Tinmouth et al.

Physician-linked mailed invitations for colorectal cancer screening

1  
2  
3  
4 the matched analysis, Pilot participants were more likely to complete an FOBT (22% vs.  
5  
6 8%,  $p < 0.0001$ ) or an FOBT or colonoscopy (25% vs. 11%,  $p < 0.0001$ ) within 6 months of  
7  
8 mailed invitation than matched controls. The number needed to invite to screen one  
9  
10 additional person was 7.  
11

12  
13  
14 Conclusions: Centralized large scale mailing of physician-linked invitations is both  
15  
16 feasible and effective in the context of organized CRC screening.  
17  
18  
19  
20  
21  
22  
23  
24  
25  
26  
27  
28  
29  
30  
31  
32  
33  
34  
35  
36  
37  
38  
39  
40  
41  
42  
43  
44  
45  
46  
47  
48  
49  
50  
51  
52  
53  
54  
55  
56  
57  
58  
59  
60

**ARTICLE SUMMARY**

Strengths and limitations of this study:

- We describe the implementation of physician-linked invitations in an organized colorectal screening program that is characterized by a high level of primary care physician involvement and that operates in a context where opportunistic screening with colonoscopy is possible
- We have shown that centralized large scale mailing of physician-linked invitations is feasible and effective in this context
- We found that physician linked mailed invitations improve CRC screening participation by 14% such that 7 physician-linked invitations need to be mailed to screen one additional person
- We were limited to data found in Ontario health administrative databases; for example, we were not able to determine family history
- Findings are promising but require appropriate infrastructure in order to be implemented in other jurisdictions

## INTRODUCTION

Colorectal cancer (CRC) is the second leading cause of cancer-related death among men and the third among women in Canada.<sup>1</sup> Fecal occult blood testing (FOBT)<sup>2-4</sup> and flexible sigmoidoscopy<sup>5-7</sup> have been shown to decrease CRC mortality in randomized controlled trials.

Given these data, organized CRC screening programs<sup>8</sup> are being implemented worldwide.<sup>9</sup> On April 1 2008, Ontario launched ColonCancerCheck (CCC), Canada's first organized province-wide CRC screening program.<sup>10</sup> Through the primary care physician, FOBT is offered to people at average risk for CRC and colonoscopy to those at increased risk based on family history. The CCC program uses a non-rehydrated guaiac FOBT (Hema-Screen, Immunostics, Inc., NJ, USA) requiring samples from 3 separate stools. While there is data to suggest that dietary restriction may be unnecessary,<sup>11</sup> the program recommends avoiding vitamin C for 3 days prior to and during the collection period in order to minimize false negative results.

Approximately 75% of Ontario residents received their care via a patient enrolled model (PEM) of care at the time of the study (2009).<sup>12</sup> PEMs comprise teams of family physicians who provide their enrolled patients with comprehensive health care and extended hours.<sup>13</sup> PEMs vary in terms of structure, services provided and remuneration (varying from enhance fee-for-service to blended capitation). All Ontario physicians are

1  
2  
3  
4 remunerated for preventive care such as CRC screening however, PEM physicians are  
5  
6 incented to a greater degree than those who are not in PEMs. Specifically, PEM  
7  
8 physicians receive a \$7/patient fee for “FOBT distribution and counseling”, a  
9  
10 \$6.86/patient fee for “CRC screening management” and an annual “Colorectal cancer  
11  
12 screening preventive care bonus” (\$220 to \$4000) depending on the proportion of  
13  
14 enrolled patients who are up-to-date with FOBT (15-70%). The physician is entitled to  
15  
16 the CRC screening management fee if the enrolled patient attends an appointment to  
17  
18 discuss CRC screening, has declined the test verbally or in writing or if there has been  
19  
20 no response after 2 written notices and a telephone call from the physician.<sup>14</sup>  
21  
22  
23  
24  
25  
26  
27

28 A central tenet of organized screening programs is that all persons in the target  
29  
30 population be invited to participate.<sup>8</sup> Implementation of this aspect of organized  
31  
32 screening varies: invitations may be sent with an FOBT kit, can include physician  
33  
34 recommendation or may incorporate tailored messaging.<sup>15 16</sup> Some of these approaches,  
35  
36 such as incorporation of physician recommendation, present significant implementation  
37  
38 challenges for organized screening programs such as Ontario's.  
39  
40

41 In 2009, the CCC program undertook the CCC Invitation Pilot (the “Pilot”), an evaluation  
42  
43 that tested the technical feasibility of a centralized approach to sending physician-linked  
44  
45 mailed invitations for CRC screening. In this paper, we describe the structure and the  
46  
47 implementation of the Pilot. In addition, we report on participant and physician factors  
48  
49  
50  
51  
52  
53  
54  
55  
56  
57  
58  
59  
60

1  
2  
3  
4 associated with response to mailed physician-linked invitations and on the effectiveness  
5  
6 of these invitations in Ontario's organized CRC screening program.  
7  
8  
9

## 10 11 12 **METHODS**

### 13 14 15 **The CCC Invitation Pilot – Implementation and Evaluation**

16  
17 The CCC program conducted the Pilot in November 2009. Invitation letters were  
18  
19 generated by the CCC program on behalf of 102 family physicians and sent to all their  
20  
21 eligible enrolled patients. Just over 11,000 eligible patient participants were sent mailed  
22  
23 invitations requesting they visit their family physician to obtain an FOBT kit or, if  
24  
25 appropriate based on family history, a referral for colonoscopy. In this paper, we report  
26  
27 on 2 studies using this cohort. Study 1 examines participant and physician factors  
28  
29 associated with response to the mailed invitation among those who were sent the mailed  
30  
31 invitation. Study 2 evaluates the effectiveness of the mailed invitation by comparing  
32  
33 uptake of CRC screening among Study 1 participants compared to a matched control  
34  
35 group. Ethics approval was obtained from the research ethics boards at Sunnybrook  
36  
37 Health Sciences Centre and the Institute for Clinical Evaluative Sciences (ICES) and  
38  
39 permission to use the Pilot data was obtained from Cancer Care Ontario's (CCO) Data  
40  
41 Access Committee. All analyses were conducted using SAS v.9 (SAS Institute, Cary,  
42  
43  
44  
45  
46  
47  
48  
49  
50  
51  
52  
53  
54  
55  
56  
57  
58  
59  
60 NC). A p-value of 0.05 was used to determine statistical significance.



## Data Sources

The Pilot study was conducted at ICES, which houses the administrative health records for all 13.5 million Ontarians. CCC program databases were linked to the ICES administrative databases using an encrypted version of the provincial health insurance number.

The ICES databases used include the Canadian Institute of Health Information (CIHI) databases, the Ontario Health Insurance Program (OHIP) Claims History Database, the Registered Persons Database (RPDB), the Ontario Cancer Registry, the ICES Physician Database, and the Client Agency Program Enrollment (CAPE) registry. The CIHI, OHIP, RPDB and the Ontario Cancer Registry and the ICES Physician Database are described elsewhere.<sup>17 18</sup> The CAPE registry tracks patients enrolled to physicians who participate in PEMs and is a centralized electronic record of the linkage between specific patients and their physicians.

Since its inception, the CCC program has collected data related to the FOBT kits administered by the CCC program, including the results of these tests, using Laboratory Reporting Tool (LRT) .

## Study 1: Factors associated with response to the mailed invitation

Tinmouth et al.

Physician-linked mailed invitations for colorectal cancer screening

1  
2  
3  
4 Cohort Definition: For the Pilot, a convenience sample of physicians participating in  
5  
6 PEM-type practices was recruited via CCO's Provincial Primary Care Cancer Network.  
7  
8 Patients enrolled to these physicians, aged 50 to 74 years without a history of CRC and  
9  
10 who were due for CRC screening (without a health administrative data record of recent  
11  
12 FOBT (previous two years) or lower GI investigation including flexible sigmoidoscopy  
13  
14 and colonoscopy (previous 5 years)), were eligible. For the Pilot mailing, CCC  
15  
16 generated lists of patient participants eligible for CRC screening for each participating  
17  
18 physician using CAPE, Ontario Cancer Registry, OHIP, CIRT and LRT. All persons who  
19  
20 were sent an invitation were included in the cohort, regardless of whether the letter was  
21  
22 returned to the sender.  
23  
24  
25  
26  
27  
28  
29

30 The Mailing: Invitations were mailed in November 2009. The date of mailing was the  
31  
32 index date. The letters were compiled centrally by the CCC program but were physician-  
33  
34 linked; patient participants were sent a letter from their own physician, as indicated by  
35  
36 their name at the bottom of the letter in an italicized font (Figure 1). The letter asked  
37  
38 participants to visit their family physician for screening; it did not include an FOBT kit.  
39  
40 The letter was accompanied by a CRC screening information brochure and sent in an  
41  
42 envelope with the family physician name in the front upper left corner. Pilot physicians  
43  
44 were not compensated for study participation, however, they were able to apply the  
45  
46 letter towards meeting the requirements for the CRC screening management fee (\$6.86  
47  
48 per eligible enrolled patient).  
49  
50  
51  
52  
53  
54  
55  
56  
57  
58  
59  
60

1  
2  
3  
4  
5  
6  
7 Response to Mailed Invitation: We used a broad definition of response to the mailed  
8  
9 invitation: any record of FOBT in either OHIP or in LRT within 6 months of the index  
10  
11 date, regardless of result (including rejected kits). Up to 10% of FOBT done in the  
12  
13 province are captured only in OHIP, which does not have data on test results. We were  
14  
15 not able to measure response in persons at increased risk of CRC as we do not have  
16  
17 family history data available in the administrative databases.  
18  
19

20  
21  
22  
23 Participant and Physician Factors: We characterized participants by age group, sex, co-  
24  
25 morbidity, median neighborhood income,<sup>19,20</sup> health region,<sup>21</sup> immigration status, and  
26  
27 prior FOBT. We measured comorbidity by counting the number of Aggregated Diagnosis  
28  
29 Groups (ADGs) using the Johns Hopkins ACG® Case-Mix System in the prior 12  
30  
31 months.<sup>22</sup> Mortality in a general population ambulatory cohort in Ontario was accurately  
32  
33 predicted using this system.<sup>23</sup> We used date of registration in the RPDB as a proxy  
34  
35 measure for immigration status; participants were considered recent immigrants if their  
36  
37 date of registration was within 5 years of the index date.<sup>24</sup>  
38  
39  
40  
41  
42  
43

44  
45 Physicians were characterized according to age, sex, training location (Canada vs.  
46  
47 outside of Canada), practice type, size of practice, age-eligible rate of colonoscopy or  
48  
49 FOBT over prior 2 years as well as the age-eligible rate of annual physical exams or  
50  
51 influenza vaccinations in the prior year. All participating physicians were in PEMs;  
52  
53  
54  
55  
56  
57  
58  
59  
60

Tinmouth et al.

Physician-linked mailed invitations for colorectal cancer screening

1  
2  
3  
4 practice types included family health groups (FHGs, enhanced fee-for-service models),  
5  
6 family health organizations or networks (FHO/FHNs, blended capitation models),  
7  
8 FHO/FHN with family health team (FHO/FHN-FHT, interprofessional team model with a  
9  
10 blended capitation fee structure) and other PEMs.<sup>25</sup> We measured practice size as the  
11  
12 number of enrolled patients stratified in a binary fashion ( $\leq 1800$  vs.  $> 1800$  enrolled  
13  
14 patients) as larger practice sizes have been shown to be associated with poorer  
15  
16 preventative care.<sup>26</sup> For the remaining physician characteristics, we identified all enrolled  
17  
18 and non-enrolled patients aged 50-74 years in their practices as of the index date. Age-  
19  
20 eligible FOBT and colonoscopy rates were obtained for each Pilot physician by  
21  
22 calculating the proportion of their age-eligible patients who had had an FOBT or  
23  
24 colonoscopy in the 2 years prior to the index date. Similarly, we calculated their rates of  
25  
26 age-eligible annual physical exams or influenza vaccine in the year prior to the index  
27  
28 date. These variables were derived in order to estimate physician adherence to CRC  
29  
30 screening and preventive medicine practices at baseline.  
31  
32  
33  
34  
35  
36  
37  
38  
39

40 Analysis: The number and proportion of persons in the cohort who responded to the  
41  
42 mailed invitation within 6 months were determined overall and by participant and  
43  
44 physician characteristics. Multivariate logistic regression modeling was used to identify  
45  
46 participant and physician factors associated with response to the mailed invitation. In  
47  
48 order to account for potential clustering of participants within physicians, Generalized  
49  
50 Estimating Equations (GEE)<sup>27</sup> were used in the model.  
51  
52  
53  
54  
55  
56  
57  
58  
59  
60

## Study 2: Evaluation of the effectiveness of mailed invitations

Overview and study participants: This was a matched double cohort analysis, comparing uptake of FOBT in those who were sent a mailed invitation (Pilot cohort) to a matched control group who were not sent a mailed invitation. The control group comprised patients who were enrolled to PEM physicians who had not participated in the Pilot. Control participants received “usual care” from the CCC program in terms of screening promotion. As such, they were eligible for screening via their primary care physician who was eligible for the same financial incentives as the Pilot physicians. Control participants were not sent a centralized physician-linked invitation from the CCC program although their physicians could send them a mailed invitation at their own discretion.

The Pilot cohort comprised all members of the cohort described in Study 1 for whom a matched control could be identified. We identified potential controls as follows: 1) Pilot physicians were matched to non-Pilot physicians who were also practicing in PEMs in a 1:5 ratio using physician age, sex, size and practice type; 2) individuals enrolled to the selected control physicians were retained if they met the same inclusion/exclusion criteria as those in the intervention cohort (aged 50 to 74 years with no prior CRC who were due for CRC screening). As with the identification of eligible participants in the

Tinmouth et al.

Physician-linked mailed invitations for colorectal cancer screening

1  
2  
3  
4 Pilot, we used CAPE, Ontario Cancer Registry, OHIP, CIRT and LRT to determine  
5  
6 eligibility of potential control participants.  
7  
8

9  
10  
11 Propensity scores that modeled the probability of belonging to the Pilot group were  
12  
13 calculated for each participant in the entire group (Pilot and control). The variables in this  
14  
15 model included age (as a continuous measure), sex, co-morbidity, median neighborhood  
16  
17 income quintile, health region, immigration status, and FOBT from 2 to 5 years prior.<sup>28 29</sup>  
18  
19 Pilot participants were matched to controls in a 1:1 fashion based on propensity scores  
20  
21 using a caliper width of 0.25. This methodology was implemented to balance the  
22  
23 distribution of participant-level variables between the Pilot and control groups.  
24  
25  
26  
27  
28  
29  
30  
31  
32

33 Response to mailed invitation: For our primary outcome, we defined response to the  
34  
35 mailed invitation as in Study 1, a record of FOBT regardless of result, within 6 months of  
36  
37 the index date. For our secondary outcome, response was defined as a record of either  
38  
39 FOBT or colonoscopy within 6 months of the index date. For the purposes of this study,  
40  
41 controls were assigned the same index date as their matched counterpart in the Pilot  
42  
43 group.  
44  
45  
46  
47  
48  
49  
50  
51  
52  
53  
54  
55  
56  
57  
58  
59  
60

1  
2  
3  
4 Analysis: Standard differences between the Pilot participants and controls were  
5  
6 calculated for the variables included in the propensity score. Important differences  
7  
8 between the 2 groups were defined by a standardized difference exceeding 0.1.<sup>29 30</sup> In  
9  
10 the primary analysis, we compared the number and proportion in the Pilot and control  
11  
12 groups responding to the mailed invitation with FOBT using McNemar's test.<sup>29</sup> We  
13  
14 determined the number of invitations mailed in order to screen one additional person  
15  
16 with FOBT. We repeated the above analyses using our secondary outcome in order to  
17  
18 determine if observed differences in FOBT uptake could be attributed to differences in  
19  
20 colonoscopy uptake (i.e., participants had CRC screening but chose colonoscopy over  
21  
22 FOBT). As the matching only accounted for participant-level variables, we repeated our  
23  
24 analyses using conditional logistic regression in order to adjust for physician covariates  
25  
26 (age, sex, practice type and size).  
27  
28  
29  
30  
31  
32  
33  
34

## 35 RESULTS

### 36 Study 1: Factors associated with response to the mailed invitation

37  
38 There were 11,311 eligible patient participants associated with the 102 family physicians  
39  
40 in the Pilot cohort. Nine participants were excluded, as we were unable to determine  
41  
42 their health region and/or income quintile; this left 11,302 participants for the analysis.  
43  
44 The majority of participants were 50 to 59 years of age, 52% were women, 48% had no  
45  
46 or low co-morbidity and 14% had completed an FOBT from 2 to 5 years prior to the  
47  
48 mailing. Two thirds of participants had a male physician, approximately half were part of  
49  
50  
51  
52  
53  
54  
55  
56  
57  
58  
59  
60

1  
2  
3  
4 a primary care team reimbursed via an enhanced fee-for-service arrangement and just  
5  
6 under half were enrolled in larger practices (>1800 enrolled patients) (Table 1).  
7  
8

9  
10  
11 2503 (22%) completed an FOBT within 6 months of mailing. In the multivariate  
12  
13 regression, the strongest participant factor associated with FOBT completion was prior  
14  
15 FOBT use (2 to 5 years prior vs. > 5 years or never: OR 2.8, 95% C.I.: 2.5 to 3.3,  $p <$   
16  
17 0.0001). Other significant factors associated with FOBT completion included older  
18  
19 participant age, greater co-morbidity, and having a female physician (Table 2).  
20  
21  
22  
23  
24

## 25 26 **Study 2: Evaluation of the effectiveness of mailed invitations**

27  
28 Of the 11,302 participants in Study 1, 10,652 were successfully matched to 10,652  
29  
30 controls using propensity scores. Standardized differences for the participant  
31  
32 characteristics included in the propensity score were all  $<0.1$ , indicating that the two  
33  
34 cohorts were well matched for measurable potential confounders (Table 3).  
35  
36  
37  
38  
39

40 Pilot participants were significantly more likely than controls to complete FOBT alone  
41  
42 (2387 (22%) versus 854 (8%),  $p < 0.0001$ ) and FOBT or colonoscopy (2664 (25%) vs.  
43  
44 1191 (11%),  $p < 0.0001$ ) within 6 months of mailing. The association between the mailed  
45  
46 invitation and CRC screening participation (either FOBT alone or FOBT or colonoscopy)  
47  
48 remained after adjusting for physician level characteristics (Table 4).  
49  
50  
51  
52  
53  
54  
55  
56  
57  
58  
59  
60



## DISCUSSION

In the current study, we have demonstrated that physician-linked mailed invitations are both feasible and effective in the context of a large organized, population-based screening program; only 7 letters would need to be sent in order to screen one additional person. Furthermore, we have found that older participants, those with greater comorbidity, those who have previously been screened and those with female physicians were more likely to respond to this type of invitation. Our findings are of particular interest to other jurisdictions planning or who already have organized CRC screening.

In other published studies of mailed invitations, an FOBT kit is often included with the invitation. Three studies done outside organized screening programs have found physician-linked invitations superior to non-linked invitations; 2 of these studies included an FOBT kit,<sup>31 32</sup> and the third study did not.<sup>33</sup> Other studies have examined mailed invitations with FOBT kits in the context of primary care practices in the USA.<sup>34-36</sup> While the results from these trials were largely supportive of mailed invitations, kit inclusion can make it difficult to separate the convenience of receiving the FOBT kit directly by mail from the impact of an invitation from one's own physician.

Our study demonstrates the effectiveness and feasibility of physician-linked invitations in the context of a large organized CRC screening program with an estimated target population of over 3 million persons. Implementation in this context confers challenges in

1  
2  
3  
4 terms of technological infra-structure, privacy and regulatory issues. There are 2 studies  
5  
6 (from the United Kingdom<sup>37</sup> and Italy<sup>38</sup>) that have reported on mailed invitations in the  
7  
8 context of organized colorectal cancer screening programs and found them to be  
9  
10 effective. Both studies included FOBT kits and one studied the impact of physician  
11  
12 endorsement specifically.<sup>37</sup> Our findings are important because they support a  
13  
14 potentially more cost-effective approach that avoids wasting kits that are mailed but not  
15  
16 used.  
17  
18  
19

20  
21  
22 Our results highlight the critical role of physician recommendation, a finding supported  
23  
24 by others. For example, in the NHS Bowel Cancer Screening Programme (BCSP)  
25  
26 currently, the primary care physician receives the result but is not directly involved in the  
27  
28 mailed invitation or the actual screening. Recently, a randomized controlled trial  
29  
30 conducted in the context of the BCSP showed that an endorsement letter from the  
31  
32 primary care provider increased participation by 6%.<sup>37</sup> In 2 studies from Australia,  
33  
34 endorsement improved initial participation<sup>31 32</sup> and over 4 successive screening  
35  
36 rounds.<sup>32</sup>  
37  
38  
39  
40  
41  
42  
43

44 Uptake of FOBT in Ontario is lower than some organized CRC screening programs in  
45  
46 other countries. For example, 30% of Ontarians were up-to-date with FOBT in 2008-9<sup>39</sup>  
47  
48 compared to 52% participation in the United Kingdom program by October 2008,<sup>40</sup> 54%  
49  
50 in the Italian program in 2007,<sup>41</sup> and 54% in the New Zealand pilot program in 2012.<sup>42</sup>  
51  
52  
53  
54  
55  
56  
57  
58  
59  
60

1  
2  
3  
4 However, in the latter countries, there is very little, if any, opportunistic CRC screening  
5 using colonoscopy whereas Ontario's program operates in a hybrid environment where  
6 opportunistic colonoscopy is available as the initial screening test in persons at average  
7 risk. It has been noted that uptake of FOBT may be lower in settings, such as Ontario's  
8 or Australia's,<sup>43</sup> where opportunistic screening is available.<sup>44</sup> The findings from the  
9 current study indicate that physician-linked invitations for CRC screening can be  
10 effective in increasing uptake of FOBT in programs that operate in the context of  
11 opportunistic colonoscopy for average risk screening.  
12  
13  
14  
15  
16  
17  
18  
19  
20  
21  
22  
23  
24

25 Our study has several limitations. First, we are unable to determine family history using  
26 Ontario administrative data. A second limitation is that a single generic letter was used.  
27 Tailored letters with key messages for specific subgroups may be more effective<sup>16</sup> – an  
28 approach that may be relevant in Ontario as we did find that response to the letter  
29 appeared to differ in various subgroups. Additionally, while our findings are promising,  
30 there are challenges to adoption by other population-based screening programs,  
31 including the need for a centralized database that links patients to their physicians.  
32 Finally, implementation of this strategy in population-based screening is predicated on  
33 physician acceptability and agreement. While we have found that this approach is  
34 acceptable in principle to many Ontario physicians,<sup>45</sup> processes to confirm individual  
35 physician agreement have not been determined for the entire CCC program which  
36 comprises an estimated 7000 primary care physicians.  
37  
38  
39  
40  
41  
42  
43  
44  
45  
46  
47  
48  
49  
50  
51  
52  
53  
54  
55  
56  
57  
58  
59  
60

## CONCLUSIONS

In summary, we have demonstrated that physician-linked mailed invitations for CRC screening, even without the inclusion of an FOBT kit, can have substantial effect on participation in an organized CRC screening program and that it is technically feasible to centrally organize and mail physician-linked invitations on a large scale. Organized screening programs, which often use unlinked invitations, should consider adopting this approach given its demonstrated effectiveness and feasibility.

## ACKNOWLEDGEMENTS

The authors would like to acknowledge Peter Austin PhD for his expert statistic advice.

They also wish to acknowledge the support of the Institutes for Clinical Evaluative Sciences, the Ontario Ministry of Health and Long Term Care and CCO. The opinions, results and conclusions reported in this paper are those of the authors and are independent from the funding sources. No endorsement by Institutes for Clinical Evaluative Sciences, the Ontario Ministry of Health and Long Term Care and CCO is intended or should be inferred.

## FUNDING STATEMENT

This study was conducted with funding support from the Ontario Institute for Cancer Research and CCO's Health Services Research Network, which is independent of the ColonCancerCheck program. This work was also supported in part by a grant from the Canadian Institutes for Health Research (grant # CST-85478). Dr. Tinmouth was supported by a Canadian Institutes of Health Research New Investigator Award during the period of this study.

## AUTHOR CONTRIBUTION:

Authors contributed substantially to each of the following areas:

-conception and design (JT, LFP, LR) or analysis and interpretation of data (JT, NB, LFP, LR, RS, LY)

Tinmouth et al.

Physician-linked mailed invitations for colorectal cancer screening

- 1  
2  
3  
4  
5 -drafting the article (JT) or revising it critically for important intellectual content (JT, NB,  
6  
7 LFP, LR, RS, LY)  
8  
9  
10 -final approval of the version to be published (JT, NB, LFP, LR, RS, LY)  
11  
12  
13

#### 14 **COMPETING INTERESTS STATEMENT**

15  
16 Dr. Tinmouth is the Lead Scientist for the ColonCancerCheck program and Dr.  
17  
18 Rabeneck oversees the ColonCancerCheck program in her capacity as the Vice-  
19  
20 President, Cancer Prevention and Control at CCO. None of the other authors have any  
21  
22 conflicts of interest to report.  
23  
24

#### 25 **DATA SHARING STATEMENT**

26  
27 Under Ontario's privacy legislation, neither Cancer Care Ontario nor ICES are permitted  
28  
29 to share individual level data from the submitted work.  
30  
31  
32  
33  
34  
35  
36  
37  
38  
39  
40  
41  
42  
43  
44  
45  
46  
47  
48  
49  
50  
51  
52  
53  
54  
55  
56  
57  
58  
59  
60

## REFERENCES

1. Canadian Cancer Society's Steering Committee on Cancer Statistics. Canadian Cancer Statistics 2013. Toronto, ON: Canadian Cancer Society, 2013.
2. Mandel JS, Church TR, Bond JH, et al. The effect of fecal occult-blood screening on the incidence of colorectal cancer. *N Engl J Med* 2000;343(22):1603-7.
3. Hardcastle JD, Chamberlain JO, Robinson MH, et al. Randomised controlled trial of faecal-occult-blood screening for colorectal cancer. *Lancet* 1996;348(9040):1472-7.
4. Kronborg O, Fenger C, Olsen J, et al. Randomised study of screening for colorectal cancer with faecal-occult-blood test. *Lancet* 1996;348(9040):1467-71.
5. Atkin WS, Edwards R, Kralj-Hans I, et al. Once-only flexible sigmoidoscopy screening in prevention of colorectal cancer: a multicentre randomised controlled trial. *Lancet* 2010;375(9726):1624-33.
6. Segnan N, Armaroli P, Bonelli L, et al. Once-Only Sigmoidoscopy in Colorectal Cancer Screening: Follow-up Findings of the Italian Randomized Controlled Trial—SCORE *J Natl Cancer Inst* 2011;103(17):1310-22
7. Schoen RE, Pinsky PF, Weissfeld JL, et al. Colorectal-cancer incidence and mortality with screening flexible sigmoidoscopy. *N Engl J Med* 2012;366(25):2345-57.
8. Miles A, Cockburn J, Smith RA, et al. A Perspective from Countries Using Organized Screening Programs. *Cancer* 2004;104(5 Suppl):1201-13.
9. International Cancer Screening Network. Inventory of Colorectal Cancer Screening Activities in ICSN Countries, May 2008. Secondary Inventory of Colorectal Cancer Screening Activities in ICSN Countries, May 2008. Feb 9 2009. <http://appliedresearch.cancer.gov/icsn/colorectal/screening.html>.
10. Anonymous. Colon Cancer Check: Ontario's colorectal cancer screening program. Secondary Colon Cancer Check: Ontario's colorectal cancer screening program Feb 2, 2012. <http://health.gov.on.ca/en/public/programs/coloncancercheck/>.
11. Pignone M, Campbell MK, Carr C, et al. Meta-analysis of dietary restriction during fecal occult blood testing. *Eff Clin Pract* 2001;4(4):150-6.
12. Glazier RH, Zagorski BM, Rayner J. Comparison of Primary Care Models in Ontario by Demographics, Case Mix and Emergency Department Use, 2008/09 to 2009/10. ICES Investigative Report. Toronto: Institute for Clinical Evaluative Sciences, 2012.
13. HealthForceOntario. Family Practice Models. Secondary Family Practice Models May 3 2013. [http://www.healthforceontario.ca/Work/OutsideOntario/PhysiciansOutsideOntario/PractisingInOntario/family\\_practice\\_models.aspx](http://www.healthforceontario.ca/Work/OutsideOntario/PhysiciansOutsideOntario/PractisingInOntario/family_practice_models.aspx).
14. Ontario Ministry of Health and Long-Term Care. Bulletin 4482: ColonCancerCheck Physician Incentives. . Secondary Bulletin 4482: ColonCancerCheck Physician

Tinmouth et al.

Physician-linked mailed invitations for colorectal cancer screening

Incentives. July 22, 2008.

<http://www.health.gov.on.ca/en/pro/programs/ohip/bulletins/4000/bul4482.pdf>.

15. Khalid-de Bakker C, Jonkers D, Smits K, et al. Participation in colorectal cancer screening trials after first-time invitation: a systematic review. *Endoscopy* 2011;43(12):1059-86.
16. Rawl SM, Skinner CS, Perkins SM, et al. Computer-delivered tailored intervention improves colon cancer screening knowledge and health beliefs of African-Americans. *Health Educ Res* 2012;27(5):868-85.
17. Alharbi O, Rabeneck L, Sutradhar R, et al. A population-based analysis of outpatient colonoscopy in adults assisted by an anesthesiologist. *Anesthesiology* 2009;111(4):734-40.
18. Robles SC, Marrett LD, Clarke EA, et al. An application of capture-recapture methods to the estimation of completeness of cancer registration. *J Clin Epidemiol* 1988;41(5):495-501.
19. Alter DA, Naylor CD, Austin P, et al. Effects of socioeconomic status on access to invasive cardiac procedures and on mortality after acute myocardial infarction. *N Engl J Med* 1999;341(18):1359-67.
20. Singh SM, Paszat LF, Li C, et al. Association of socioeconomic status and receipt of colorectal cancer investigations: a population-based retrospective cohort study. *Can Med Assoc J* 2004;171(5):461-5.
21. Anonymous. Ontario's Local Health Integration Networks. Secondary Ontario's Local Health Integration Networks May 30 2013. <http://www.lhins.on.ca/home.aspx>.
22. Anonymous. The Johns Hopkins University ACG Case-Mix System. Secondary The Johns Hopkins University ACG Case-Mix System 2012. <http://www.acg.jhsph.edu/>.
23. Austin PC, van Walraven C, Wodchis WP, et al. Using the Johns Hopkins Aggregated Diagnosis Groups (ADGs) to predict mortality in a general adult population cohort in Ontario, Canada. *Med Care* 2011;49(10):932-9.
24. Ray JG, Vermeulen MJ, Schull MJ, et al. Results of the Recent Immigrant Pregnancy and Perinatal Long-term Evaluation Study (RIPPLES). *Can Med Assoc J* 2007;176(10):1419-26.
25. Glazier RH, Klein-Geltink J, Kopp A, et al. Capitation and enhanced fee-for-service models for primary care reform: a population-based evaluation. *Can Med Assoc J* 2009;180(11):E72-E81.
26. Dahrouge S, Hogg WE, Russell G, et al. Impact of remuneration and organizational factors on completing preventive manoeuvres in primary care practices. *Can Med Assoc J* 2012;184(2):E135-43.
27. Liang K, Zeger SL. Longitudinal data analysis using generalized linear models. *Biometrika* 1986;73:13-22.



- 1
- 2
- 3
- 4
- 5 28. D'Agostino RB, Jr. Propensity score methods for bias reduction in the comparison
- 6 of a treatment to a non-randomized control group. *Stat Med*
- 7 1998;17(19):2265-81.
- 8 29. Austin PC. An Introduction to Propensity Score Methods for Reducing the Effects
- 9 of Confounding in Observational Studies. *Multivariate Behav Res*
- 10 2011;46(3):399-424.
- 11 30. Normand ST, Landrum MB, Guadagnoli E, et al. Validating recommendations for
- 12 coronary angiography following acute myocardial infarction in the elderly: a
- 13 matched analysis using propensity scores. *J Clin Epidemiol* 2001;54(4):387-98.
- 14 31. Cole SR, Young GP, Byrne D, et al. Participation in screening for colorectal cancer
- 15 based on a faecal occult blood test is improved by endorsement by the
- 16 primary care practitioner. *J Med Screen* 2002;9(4):147-52.
- 17 32. Zajac IT, Whibley AH, Cole SR, et al. Endorsement by the primary care practitioner
- 18 consistently improves participation in screening for colorectal cancer: a
- 19 longitudinal analysis. *J Med Screen* 2010;17(1):19-24.
- 20 33. Grazzini G, Castiglione G, Isu A, et al. Colorectal cancer screening by fecal occult
- 21 blood testing: results of a population-based experience. *Tumori*
- 22 2000;86(5):384-8.
- 23 34. Myers RE, Sifri R, Hyslop T, et al. A randomized controlled trial of the impact of
- 24 targeted and tailored interventions on colorectal cancer screening. *Cancer*
- 25 2007;110(9):2083-91.
- 26 35. Sequist TD, Zaslavsky AM, Marshall R, et al. Patient and physician reminders to
- 27 promote colorectal cancer screening: a randomized controlled trial. *Arch*
- 28 *Intern Med* 2009;169(4):364-71.
- 29 36. Walsh JM, Salazar R, Terdiman JP, et al. Promoting use of colorectal cancer
- 30 screening tests. Can we change physician behavior? *J Gen Intern Med*
- 31 2005;20(12):1097-101.
- 32 37. Hewitson P, Ward AM, Heneghan C, et al. Primary care endorsement letter and a
- 33 patient leaflet to improve participation in colorectal cancer screening: results
- 34 of a factorial randomised trial. *Br J Cancer* 2011;105(4):475-80.
- 35 38. Giorgi Rossi P, Grazzini G, Anti M, et al. Direct mailing of faecal occult blood tests
- 36 for colorectal cancer screening: a randomized population study from Central
- 37 Italy. *J Med Screen* 2011;18(3):121-7.
- 38 39. Cancer Quality Council of Ontario. Colorectal Cancer Screening: Participation. .
- 39 Secondary Colorectal Cancer Screening: Participation. 2013.
- 40 [http://www.csqi.on.ca/cms/one.aspx?portalId=258922&pageId=273238 -](http://www.csqi.on.ca/cms/one.aspx?portalId=258922&pageId=273238-.UijqNMakrmQ)
- 41 [.UijqNMakrmQ.](http://www.csqi.on.ca/cms/one.aspx?portalId=258922&pageId=273238-.UijqNMakrmQ)
- 42 40. Logan RF, Patnick J, Nickerson C, et al. Outcomes of the Bowel Cancer Screening
- 43 Programme (BCSP) in England after the first 1 million tests. *Gut*
- 44 2012;61(10):1439-46.
- 45 41. Parente F, Boemo C, Ardizzoia A, et al. Outcomes and cost evaluation of the first
- 46 two rounds of a colorectal cancer screening program based on
- 47
- 48
- 49
- 50
- 51
- 52
- 53
- 54
- 55
- 56
- 57
- 58
- 59
- 60

Tinmouth et al.

Physician-linked mailed invitations for colorectal cancer screening

- 1  
2  
3  
4 immunochemical fecal occult blood test in northern Italy. *Endoscopy*  
5 2013;45(1):27-34.  
6  
7 42. New Zealand Ministry of Health. Bowel Screening Pilot January to June 2012  
8 results. Secondary Bowel Screening Pilot January to June 2012 results 26 April  
9 2013. [http://www.health.govt.nz/our-work/diseases-and-conditions/cancer-](http://www.health.govt.nz/our-work/diseases-and-conditions/cancer-programme/bowel-cancer-programme/bowel-screening-pilot/bowel-screening-pilot-results/bowel-screening-pilot-january-june-2012-results)  
10 [programme/bowel-cancer-programme/bowel-screening-pilot/bowel-](http://www.health.govt.nz/our-work/diseases-and-conditions/cancer-programme/bowel-cancer-programme/bowel-screening-pilot/bowel-screening-pilot-results/bowel-screening-pilot-january-june-2012-results)  
11 [screening-pilot-results/bowel-screening-pilot-january-june-2012-results](http://www.health.govt.nz/our-work/diseases-and-conditions/cancer-programme/bowel-cancer-programme/bowel-screening-pilot/bowel-screening-pilot-results/bowel-screening-pilot-january-june-2012-results).  
12  
13 43. Zajac IT, Flight I, Turnbull D, et al. Self-reported bowel screening rates in older  
14 Australians and the implications for public health screening programs.  
15 *Australas Med J* 2013;6(8):411-7.  
16  
17 44. Moss SM, Ancelle-Park R, Brenner H. Evaluation and interpretation of screening  
18 outcomes. In: Patnick J, Segnan N, von Karsa L, eds. European guidelines for  
19 quality assurance in colorectal cancer screening and diagnosis. Luxembourg:  
20 International Agency for Research on Cancer 2010.  
21  
22 45. Tinmouth J, Ritvo P, McGregor SE, et al. ColonCancerCheck Primary Care Invitation  
23 Pilot project: family physician perceptions. *Can Fam Physician*  
24 2012;58(10):e570-7.  
25  
26  
27  
28  
29  
30  
31  
32  
33  
34  
35  
36  
37  
38  
39  
40  
41  
42  
43  
44  
45  
46  
47  
48  
49  
50  
51  
52  
53  
54  
55  
56  
57  
58  
59  
60

## Tables.

Table 1. Patient participant and physician characteristics for Study 1

|                                              | FOBT within 6 months<br>(n=2,503) | No FOBT within 6 months<br>(n=8,799) | Total<br>(n=11,302) |
|----------------------------------------------|-----------------------------------|--------------------------------------|---------------------|
| <b>Patient participants</b>                  |                                   |                                      |                     |
| Age group in years, No. (%)                  |                                   |                                      |                     |
| 50-59                                        | 1,279 (51%)                       | 5,384 (61%)                          | 6,663 (59%)         |
| 60-69                                        | 894 (36%)                         | 2,637 (30%)                          | 3,531 (31%)         |
| 70-74                                        | 330 (13%)                         | 778 (9%)                             | 1,108 (10%)         |
| Sex, No. (%)                                 |                                   |                                      |                     |
| Female                                       | 1,299 (52%)                       | 4,554 (52%)                          | 5,853 (52%)         |
| Male                                         | 1,204 (48%)                       | 4,245 (48%)                          | 5,449 (48%)         |
| Co-morbidity*, No. of ADGs (%)               |                                   |                                      |                     |
| 0                                            | 257 (10%)                         | 1,279 (15%)                          | 1,536 (14%)         |
| 1-2                                          | 828 (33%)                         | 3,044 (35%)                          | 3,872 (34%)         |
| 3-4                                          | 712 (28%)                         | 2,241 (25%)                          | 2,953 (26%)         |
| 5-6                                          | 393 (16%)                         | 1,224 (14%)                          | 1,617 (14%)         |
| 7+                                           | 313 (13%)                         | 1,011 (11%)                          | 1,324 (12%)         |
| Median neighborhood income quintile, No. (%) |                                   |                                      |                     |
| Rural                                        | 394 (16%)                         | 1,431 (16%)                          | 1,825 (16%)         |
| Low Urban                                    | 360 (14%)                         | 1,375 (16%)                          | 1,735 (15%)         |
| 2                                            | 402 (16%)                         | 1,418 (16%)                          | 1,820 (16%)         |
| 3                                            | 429 (17%)                         | 1,430 (16%)                          | 1,859 (16%)         |
| 4                                            | 432 (17%)                         | 1,552 (18%)                          | 1,984 (18%)         |
| High Urban                                   | 486 (19%)                         | 1,593 (18%)                          | 2,079 (18%)         |
| Health region, No. (%)                       |                                   |                                      |                     |
| Erie St.Clair                                | 125 (5%)                          | 337 (4%)                             | 462 (4%)            |
| South West                                   | 284 (11%)                         | 823 (9%)                             | 1,107 (10%)         |
| Waterloo Wellington                          | 76 (3%)                           | 251 (3%)                             | 327 (3%)            |
| Hamilton Niagara                             | 289 (12%)                         | 976 (11%)                            | 1,265 (11%)         |
| Central West                                 | 138 (6%)                          | 482 (5%)                             | 620 (5%)            |
| Mississauga Halton                           | 22 (1%)                           | 120 (1%)                             | 142 (1%)            |
| Toronto Central                              | 111 (4%)                          | 392 (4%)                             | 503 (4%)            |
| Central                                      | 24 (1%)                           | 177 (2%)                             | 201 (2%)            |
| Central East                                 | 361 (14%)                         | 1,282 (15%)                          | 1,643 (15%)         |
| South East                                   | 162 (6%)                          | 697 (8%)                             | 859 (8%)            |
| Champlain                                    | 219 (9%)                          | 676 (8%)                             | 895 (8%)            |
| North Simcoe-Muskoka                         | 77 (3%)                           | 188 (2%)                             | 265 (2%)            |
| North East                                   | 291 (12%)                         | 1,118 (13%)                          | 1,409 (12%)         |
| North West                                   | 324 (13%)                         | 1,280 (15%)                          | 1,604 (14%)         |

Tinmouth et al.

## Physician-linked mailed invitations for colorectal cancer screening

|                                                              |             |             |             |
|--------------------------------------------------------------|-------------|-------------|-------------|
| Recent immigrant, No. (%)                                    | 23 (1%)     | 88 (1%)     | 111 (1%)    |
| FOBT 2 to 5 years prior to mailing, No. (%)                  | 643 (26%)   | 905 (10%)   | 1,548 (14%) |
| <b>Physician</b>                                             |             |             |             |
| Median age in years (IQR)                                    | 52 (45-59)  | 53 (46-59)  | 52 (45-59)  |
| Sex, No. (%)                                                 |             |             |             |
| Female                                                       | 936 (37%)   | 3,044 (35%) | 3,980 (35%) |
| Male                                                         | 1,567 (63%) | 5,755 (65%) | 7,322 (65%) |
| Training location, No. (%)                                   |             |             |             |
| Outside Canada                                               | 312 (12%)   | 1,196 (14%) | 1,508 (13%) |
| In Canada                                                    | 2,191 (88%) | 7,603 (86%) | 9,794 (87%) |
| Practice type, No. (%)                                       |             |             |             |
| FHG                                                          | 1,082 (43%) | 4,266 (48%) | 5,348 (47%) |
| FHO/FHN                                                      | 432 (17%)   | 1,456 (17%) | 1,888 (17%) |
| FHO/FHN-FHT                                                  | 881 (35%)   | 2,620 (30%) | 3,501 (31%) |
| Other PEM                                                    | 108 (4%)    | 457 (5%)    | 565 (5%)    |
| Practice size (enrolled patients), No. (%)                   |             |             |             |
| >1800 patients                                               | 1,105 (44%) | 4,104 (47%) | 5,209 (46%) |
| Age-eligible rate of colonoscopy quintile, No. (%)           |             |             |             |
| Low                                                          | 485 (19%)   | 1,619 (18%) | 2,104 (19%) |
| 2                                                            | 548 (22%)   | 1,940 (22%) | 2,488 (22%) |
| 3                                                            | 637 (25%)   | 2,279 (26%) | 2,916 (26%) |
| 4                                                            | 477 (19%)   | 1,696 (19%) | 2,173 (19%) |
| High                                                         | 356 (14%)   | 1,265 (14%) | 1,621 (14%) |
| Age-eligible rate of FOBT quintile, No. (%)                  |             |             |             |
| Low                                                          | 487 (19%)   | 1,888 (21%) | 2,375 (21%) |
| 2                                                            | 504 (20%)   | 1,886 (21%) | 2,390 (21%) |
| 3                                                            | 533 (21%)   | 1,890 (21%) | 2,423 (21%) |
| 4                                                            | 522 (21%)   | 1,680 (19%) | 2,202 (19%) |
| High                                                         | 457 (18%)   | 1,455 (17%) | 1,912 (17%) |
| Age-eligible rate of annual physical exams quintile, No. (%) |             |             |             |
| Low                                                          | 496 (20%)   | 2,009 (23%) | 2,505 (22%) |
| 2                                                            | 490 (20%)   | 1,625 (18%) | 2,115 (19%) |
| 3                                                            | 472 (19%)   | 1,638 (19%) | 2,110 (19%) |
| 4                                                            | 509 (20%)   | 1,686 (19%) | 2,195 (19%) |
| High                                                         | 536 (21%)   | 1,841 (21%) | 2,377 (21%) |

## Physician-linked mailed invitations for colorectal cancer screening

|                                                          |           |             |             |
|----------------------------------------------------------|-----------|-------------|-------------|
| Age-eligible rate of influenza vaccine quintile, No. (%) |           |             |             |
| Low                                                      | 548 (22%) | 1,997 (23%) | 2,545 (23%) |
| 2                                                        | 549 (22%) | 1,765 (20%) | 2,314 (20%) |
| 3                                                        | 435 (17%) | 1,930 (22%) | 2,365 (21%) |
| 4                                                        | 485 (19%) | 1,770 (20%) | 2,255 (20%) |
| High                                                     | 486 (19%) | 1,337 (15%) | 1,823 (16%) |

\*Co-morbidity scored using number of Aggregated Diagnosis Groups (ADGs) using the Johns Hopkins Case Mix System

FHG = family health group

FHO/FHN = family health organizations or networks

Other PEM = other patient enrolled model of care

FOBT = fecal occult blood test

For peer review only

Tinmouth et al.

Physician-linked mailed invitations for colorectal cancer screening

Table 2. Multivariate logistic regression analysis using Generalized Estimating Equations for the characteristics of participants and physicians associated with completing an FOBT within 6 months of the mailing date.

| Participants                        | Odds ratio (95% C.I.) | P-value |
|-------------------------------------|-----------------------|---------|
| Age group, years                    |                       |         |
| 50-59                               | 0.6 (0.5, 0.8)        | <.0001  |
| 60-69                               | 0.8 (0.7, 1.0)        | NS      |
| 70-74                               | Reference             | N/A     |
| Sex                                 |                       |         |
| Female                              | 0.9 (0.9, 1.0)        | NS      |
| Male                                | Reference             | N/A     |
| Co-morbidity*, No. of ADGs          |                       |         |
| 0                                   | 0.7 (0.6, 0.8)        | 0.0002  |
| 1-2                                 | 0.9 (0.7, 1.0)        | NS      |
| 3-4                                 | 1.0 (0.9, 1.2)        | NS      |
| 5-6                                 | 1.0 (0.9, 1.2)        | NS      |
| 7+                                  | Reference             | N/A     |
| Median neighborhood income quintile |                       |         |
| Rural                               | 0.9 (0.7, 1.1)        | NS      |
| Low Urban                           | 0.9 (0.7, 1.0)        | NS      |
| 2                                   | 1.0 (0.8, 1.1)        | NS      |
| 3                                   | 1.0 (0.9, 1.1)        | NS      |
| 4                                   | 0.9 (0.8, 1.1)        | NS      |
| High Urban                          | Reference             | N/A     |
| Health region                       |                       |         |
| Erie St.Clair                       | 1.3 (0.9, 1.8)        | NS      |
| South West                          | 0.9 (0.6, 1.4)        | NS      |
| Waterloo Wellington                 | 0.8 (0.6, 1.2)        | NS      |
| Hamilton Niagara                    | 0.9 (0.6, 1.2)        | NS      |
| Central West                        | 1.0 (0.7, 1.4)        | NS      |
| Mississauga Halton                  | 0.6 (0.3, 1.2)        | NS      |
| Toronto Central                     | 0.8 (0.6, 1.2)        | NS      |
| Central                             | 0.5 (0.4, 0.7)        | 0.0004  |
| South East                          | 0.8 (0.5, 1.3)        | NS      |
| Champlain                           | 1.0 (0.7, 1.4)        | NS      |
| North Simcoe-Muskoka                | 0.9 (0.6, 1.4)        | NS      |
| North East                          | 1.1 (0.7, 1.5)        | NS      |
| North West                          | 0.7 (0.5, 1.0)        | 0.03    |
| Central East                        | Reference             | N/A     |
| Recency of immigration              |                       |         |
| Remote or non-immigrant             | 1.0 (0.6, 1.6)        | NS      |
| Recent immigrant                    | Reference             | N/A     |
| Prior FOBT Use                      |                       |         |
| 2 to 5 years prior to mailing       | 2.8 (2.5, 3.3)        | <.0001  |

|                                                     |                |      |
|-----------------------------------------------------|----------------|------|
| > 5 years or never                                  | Reference      |      |
| <b>Physician</b>                                    |                |      |
| Increasing age (per year)                           | 1.0 (1.0, 1.0) | NS   |
| Sex                                                 |                |      |
| Female                                              | 1.3 (1.0, 1.5) | 0.02 |
| Male                                                | Reference      | N/A  |
| Training location                                   |                |      |
| In Canada                                           | 0.9 (0.7, 1.2) | NS   |
| Outside Canada                                      | Reference      | N/A  |
| Practice type                                       |                |      |
| FHG                                                 | 0.9 (0.7, 1.1) | NS   |
| FHO/FHN                                             | 0.8 (0.6, 1.1) | NS   |
| Other PEM                                           | 0.7 (0.4, 1.0) | 0.05 |
| FHO/FHN-FHT                                         | Reference      | N/A  |
| Practice size (enrolled patients)                   |                |      |
| ≤ 1800 patients                                     | 1.1 (0.9, 1.3) | NS   |
| > 1800 patients                                     | Reference      | N/A  |
| Age-eligible rate of colonoscopy quintile           |                |      |
| Low                                                 | 1.1 (0.8, 1.5) | NS   |
| 2                                                   | 1.2 (1.0, 1.6) | NS   |
| 3                                                   | 1.0 (0.8, 1.2) | NS   |
| 4                                                   | 1.0 (0.8, 1.3) | NS   |
| High                                                | Reference      | N/A  |
| Age-eligible rate of FOBT quintile                  |                |      |
| 2                                                   | 0.9 (0.6, 1.3) | NS   |
| 3                                                   | 0.9 (0.7, 1.2) | NS   |
| 4                                                   | 1.1 (0.8, 1.4) | NS   |
| High                                                | 0.9 (0.7, 1.3) | NS   |
| Low                                                 | Reference      | N/A  |
| Age-eligible rate of annual physical exams quintile |                |      |
| 2                                                   | 1.4 (0.9, 2.0) | NS   |
| 3                                                   | 1.3 (0.9, 1.8) | NS   |
| 4                                                   | 1.3 (0.9, 1.8) | NS   |
| High                                                | 1.1 (0.8, 1.5) | NS   |
| Low                                                 | Reference      | N/A  |
| Age-eligible rate of influenza vaccine quintile     |                |      |
| 2                                                   | 1.0 (0.8, 1.2) | NS   |
| 3                                                   | 0.8 (0.6, 1.0) | 0.02 |
| 4                                                   | 0.9 (0.7, 1.2) | NS   |
| High                                                | 1.3 (1.0, 1.7) | NS   |
| Low                                                 | Reference      | N/A  |

\*Co-morbidity scored using number of Aggregated Diagnosis Groups (ADGs) using the Johns Hopkins Case Mix System

FHG = family health group

FHO/FHN = family health organizations or networks

Tinmouth et al.

Physician-linked mailed invitations for colorectal cancer screening

1  
2  
3  
4 Other PEM = other patient enrolled model of care

5 NS = not significant

6 N/A - not applicable

7 FOBT = fecal occult blood test  
8  
9  
10  
11  
12  
13  
14  
15  
16  
17  
18  
19  
20  
21  
22  
23  
24  
25  
26  
27  
28  
29  
30  
31  
32  
33  
34  
35  
36  
37  
38  
39  
40  
41  
42  
43  
44  
45  
46  
47  
48  
49  
50  
51  
52  
53  
54  
55  
56  
57  
58  
59  
60

For peer review only



Table 3. Characteristics of the 2 cohorts matched by propensity score in Study 2

|                                              | <b>Pilot participants</b><br>(n=10,652) | <b>Control participants</b><br>(n=10,652) | <b>Standardized Difference*</b> |
|----------------------------------------------|-----------------------------------------|-------------------------------------------|---------------------------------|
| <b>Participants</b>                          |                                         |                                           |                                 |
| Age group in years, No. (%)                  |                                         |                                           |                                 |
| 50-59                                        | 6,248 (59%)                             | 6,324 (59%)                               | 0.01                            |
| 60-69                                        | 3,342 (31%)                             | 3,316 (31%)                               | 0.01                            |
| 70-74                                        | 1,062 (10%)                             | 1,012 (10%)                               | 0.02                            |
| Sex, No. (%)                                 |                                         |                                           |                                 |
| Female                                       | 5548 (52%)                              | 5477 (51%)                                | 0.01                            |
| Male                                         | 5,104 (48%)                             | 5,175 (49%)                               | 0.01                            |
| Co-morbidity**, No. of ADGs (%)              |                                         |                                           |                                 |
| 0                                            | 1,462 (14%)                             | 1,425 (13%)                               | 0.01                            |
| 1-2                                          | 3,647 (34%)                             | 3,716 (35%)                               | 0.01                            |
| 3-4                                          | 2,764 (26%)                             | 2,835 (27%)                               | 0.02                            |
| 5-6                                          | 1,536 (14%)                             | 1,473 (14%)                               | 0.02                            |
| 7+                                           | 1,243 (12%)                             | 1,203 (11%)                               | 0.01                            |
| Median neighborhood income quintile, No. (%) |                                         |                                           |                                 |
| Rural                                        | 1,825 (17%)                             | 1,889 (18%)                               | 0.02                            |
| Low Urban                                    | 1,628 (15%)                             | 1,699 (16%)                               | 0.02                            |
| 2                                            | 1,698 (16%)                             | 1,728 (16%)                               | 0.01                            |
| 3                                            | 1,728 (16%)                             | 1,681 (16%)                               | 0.01                            |
| 4                                            | 1,831 (17%)                             | 1,753 (16%)                               | 0.02                            |
| High Urban                                   | 1,942 (18%)                             | 1,902 (18%)                               | 0.01                            |
| Health region, No. (%)                       |                                         |                                           |                                 |
| Erie St.Clair                                | 462 (4%)                                | 423 (4%)                                  | 0.02                            |
| South West                                   | 1,107 (10%)                             | 1,114 (10%)                               | 0                               |
| Waterloo Wellington                          | 327 (3%)                                | 343 (3%)                                  | 0.01                            |
| Hamilton Niagara                             | 1,265 (12%)                             | 1,290 (12%)                               | 0.01                            |
| Central West                                 | 620 (6%)                                | 580 (5%)                                  | 0.02                            |
| Mississauga Halton                           | 142 (1%)                                | 144 (1%)                                  | 0                               |
| Toronto Central                              | 503 (5%)                                | 478 (4%)                                  | 0.01                            |
| Central                                      | 201 (2%)                                | 209 (2%)                                  | 0.01                            |
| Central East                                 | 1,643 (15%)                             | 1,702 (16%)                               | 0.02                            |
| South East                                   | 859 (8%)                                | 891 (8%)                                  | 0.01                            |
| Champlain                                    | 895 (8%)                                | 904 (8%)                                  | 0                               |
| North Simcoe-Muskoka                         | 265 (2%)                                | 242 (2%)                                  | 0.01                            |
| North East                                   | 1,409 (13%)                             | 1,378 (13%)                               | 0.01                            |
| North West                                   | 954 (9%)                                | 954 (9%)                                  | 0                               |
| Recent immigrant, No. (%)                    | 111 (1%)                                | 105 (1%)                                  | 0.01                            |
| FOBT 2 to 5 years prior to mailing, No. (%)  | 1,476 (14%)                             | 1,240 (12%)                               | 0.07                            |
| <b>Physician</b>                             |                                         |                                           |                                 |

Tinmouth et al.

## Physician-linked mailed invitations for colorectal cancer screening

|                                            |             |             |     |
|--------------------------------------------|-------------|-------------|-----|
| Median age in years (IQR)                  | 52 (45-59)  | 52 (47-58)  | N/A |
| Sex, No. (%)                               |             |             |     |
| Female                                     | 3,875 (36%) | 3,335 (31%) | N/A |
| Male                                       | 6,777 (64%) | 7,317 (69%) |     |
| Practice type, No. (%)                     |             |             |     |
| FHG                                        | 4,854 (46%) | 4,885 (46%) | N/A |
| FHO/FHN                                    | 1,859 (17%) | 1,718 (16%) |     |
| FHO/FHN-FHT                                | 3,374 (32%) | 3,027 (28%) |     |
| Other PEM                                  | 565 (5%)    | 1,022 (10%) |     |
| Practice size (enrolled patients), No. (%) |             |             |     |
| >1800 patients                             | 5,366 (50%) | 5,026 (47%) | N/A |

\*Standardized differences for physician level variables not reported as propensity scores were estimated using patient level characteristics only

\*\*Co-morbidity scored using number of Aggregated Diagnosis Groups (ADGs) using the Johns Hopkins Case Mix System

FHG = family health group

FHO/FHN = family health organizations or networks

Other PEM = other patient enrolled model of care

FOBT = fecal occult blood test

Table 4. Association between mailed invitation and FOBT completion or mailed invitation and FOBT or colonoscopy completion after adjusting for physician factors.

|                                   | FOBT completion       |         | FOBT or Colonoscopy completion |         |
|-----------------------------------|-----------------------|---------|--------------------------------|---------|
|                                   | Odds ratio (95% C.I.) | P-value | Odds ratio (95% C.I.)          | P-value |
| Mailed invitation                 |                       |         |                                |         |
| Yes (Pilot)                       | 3.3 (3.1, 3.6)        | <.0001  | 2.7 (2.5, 2.9)                 | <.0001  |
| No (Controls)                     | Reference             | N/A     | Reference                      | N/A     |
| Increasing age (per year)         | 1.0 ( 1.0, 1.0)       | NS      | 1.0 (1.0, 1.0)                 | 0.03    |
| Sex, No. (%)                      |                       |         |                                |         |
| Female                            | 1.0 (0.9, 1.1)        | NS      | 1.0 (0.9, 1.1)                 | NS      |
| Male                              | Reference             | N/A     | Reference                      | N/A     |
| Practice type, No. (%)            |                       |         |                                |         |
| FHG                               | 0.7 (0.6, 0.8)        | <.0001  | 0.7 (0.7, 0.8)                 | <.0001  |
| FHO/FHN                           | 0.8 (0.7, 0.9)        | <.0001  | 0.8 (0.7, 0.9)                 | <.0001  |
| Other PEM                         | 0.8 (0.7, 1.0)        | 0.03    | 0.8 (0.7, 1.0)                 | NS      |
| FHO/FHN-FHT                       | Reference             | N/A     | Reference                      | N/A     |
| Practice size (enrolled patients) |                       |         |                                |         |
| ≤ 1800 patients                   | 1.2 (1.1, 1.3)        | 0.0004  | 1.2 (1.1, 1.3)                 | <.0001  |
| > 1800 patients                   | Reference             | N/A     | Reference                      | N/A     |

FHG = family health group

FHO/FHN = family health organizations or networks

Other PEM = other patient enrolled model of care

FOBT = fecal occult blood test

## Figure Legends

Figure 1. Mock-up of physician-linked invitation used in the Pilot.

For peer review only

## TITLE PAGE

**Title:** Using pPhysician-linked mailed invitations ~~to be screened~~ in an organized colorectal cancer screening program: effectiveness and factors associated with response..

**Short title:** Physician-linked invitations for colorectal cancer screening

**Authors:**Jill Tinmouth<sup>1,3,5,6</sup>Nancy N. Baxter<sup>3,5,7</sup>Lawrence F. Paszat<sup>2,3,4</sup>Linda Rabeneck<sup>1,3,4,5,6</sup>Rinku Sutradhar<sup>3,4</sup>Lingsong Yun<sup>3</sup>

**Affiliations:** Departments of Medicine<sup>1</sup> and Radiation Oncology<sup>2</sup>, Sunnybrook Health Sciences Centre, Toronto, Canada; Institute for Clinical Evaluative Sciences, Toronto, Canada<sup>3</sup>; Dalla Lana School of Public Health, University of Toronto, Toronto, Canada<sup>4</sup>; Institute of Health Policy Management and Evaluation, University of Toronto, Toronto, Canada<sup>5</sup>; Cancer Care Ontario, Toronto, Canada<sup>6</sup>; Department of General Surgery and Li Ka Shing Knowledge Institute, St. Michael's Hospital, Toronto, Canada<sup>7</sup>.

Corresponding Author Information:

Jill Tinmouth MD PhD FRCPC

Sunnybrook Health Sciences Centre

2075 Bayview Ave Rm HG40

Toronto ON M4N 3M5

416 480-5910 t

416 480-4845 f

[jill.tinmouth@sunnybrook.ca](mailto:jill.tinmouth@sunnybrook.ca)**Email addresses of authors:**

Nancy N. Baxter

[BaxterN@smh.toronto.on.ca](mailto:BaxterN@smh.toronto.on.ca)

Lawrence F. Paszat

[lawrence.paszat@ices.on.ca](mailto:lawrence.paszat@ices.on.ca)

Linda Rabeneck

[Linda.Rabeneck@cancercare.on.ca](mailto:Linda.Rabeneck@cancercare.on.ca)

Rinku Sutradhar

[Rinku.Sutradhar@ices.on.ca](mailto:Rinku.Sutradhar@ices.on.ca)

Lingsong Yun

[Lingsong.Yun@ices.on.ca](mailto:Lingsong.Yun@ices.on.ca)

**Word count:** ~~3244~~3159 (main text), ~~2632~~ (abstract)

Formatted: Not Highlight

Tinmouth et al.  
Physician-linked mailed invitations for colorectal cancer screening

Number of Tables: 4

Number of Figures: 1

Number of References: 4045

Formatted: Highlight

Key words: Mailed invitations, colorectal cancer, organized screening

Tinmouth et al.  
Physician-linked mailed invitations for colorectal cancer screening

## ABSTRACT

**Objectives:** A central tenet of organized cancer screening is that all persons in a target population are invited. The aims of this study were to identify participant and physician factors associated with response to mailed physician-linked invitations (Study 1) and to evaluate their effectiveness in an organized colorectal (CRC) screening program (Study 2).

**Design and setting:** Two studies (Study 1 – cohort design and Study 2 – matched cohort design, ~~of comprising~~ Study 1 participants and a matched control group) conducted in context of Ontario's organized province-wide CRC screening program.

**Participants:** 102 family physicians and 11,302 associated eligible patients from a technical evaluation ("the Pilot") of large scale mailed invitations for CRC screening were included. Matched controls were randomly selected using propensity scores from among eligible patients associated with family physicians in similar practice types as the Pilot physicians.

**Intervention:** Physician-linked mailed invitation to have CRC screening.

**Outcomes:** Uptake of fecal occult blood test (FOBT) within 6 months of mailed invitation (primary) and uptake of FOBT or colonoscopy within 6 months of mailed invitation (secondary).

**Results:** Factors significantly associated with uptake of FOBT included prior FOBT use, older participant age, greater participant co-morbidity and having a female physician. In

1  
2  
3  
4  
5  
6  
7  
8  
9  
10  
11  
12  
13  
14  
15  
16  
17  
18  
19  
20  
21  
22  
23  
24  
25  
26  
27  
28  
29  
30  
31  
32  
33  
34  
35  
36  
37  
38  
39  
40  
41  
42  
43  
44  
45  
46  
47  
48  
49  
50  
51  
52  
53  
54  
55  
56  
57  
58  
59  
60

Tinmouth et al.  
Physician-linked mailed invitations for colorectal cancer screening

the matched analysis, Pilot participants were more likely to complete an FOBT (22% vs. 8%,  $p < 0.0001$ ) or an FOBT or colonoscopy (25% vs. 11%,  $p < 0.0001$ ) within 6 months of mailed invitation than matched controls. The number needed to invite to screen one additional person was 7.

Conclusions: Centralized large scale mailing of physician-linked invitations is both feasible and effective in ~~an~~ the context of organized CRC screening ~~program~~.



Tinmouth et al.  
Physician-linked mailed invitations for colorectal cancer screening

## ARTICLE SUMMARY

Strengths and limitations of this study:

- We describe the implementation of physician-linked invitations in an organized colorectal screening program that is characterized by a high level of primary care physician involvement and that operates in a context where opportunistic screening with colonoscopy is possible
- We have shown that centralized large scale mailing of physician-linked invitations is feasible and effective in this context
- We found that physician linked mailed invitations improve CRC screening participation by 14% such that 7 physician-linked invitations need to be mailed to screen one additional person
- We were limited to data found in Ontario health administrative databases; for example, we were not able to determine family history
- Findings are promising but require appropriate infrastructure in order to be implemented in other jurisdictions

Tinmouth et al.  
Physician-linked mailed invitations for colorectal cancer screening

## INTRODUCTION

Colorectal cancer (CRC) is ~~the 3<sup>rd</sup> most common cancer and the 4<sup>th</sup>~~ the second leading cause of cancer-related death among men and the third among women worldwide in Canada.<sup>1</sup>~~REF.~~ Fecal occult blood testing (FOBT)<sup>2-4</sup> and flexible sigmoidoscopy<sup>5-7</sup> have been shown to decrease CRC mortality in randomized controlled trials.

Given these data, organized CRC screening programs<sup>8</sup> are being implemented worldwide.<sup>9</sup> On April 1 2008, Ontario launched ColonCancerCheck (CCC), Canada's first organized province-wide CRC screening program, ~~ColonCancerCheck (CCC).~~<sup>10</sup> ~~CCC has a dual strategy: t~~ Through the primary care physician, FOBT is offered to people at average risk for CRC and colonoscopy to those at increased risk based on family history. The CCC program uses a non-rehydrated guaiac FOBT (Hema-Screen, Immunostics, Inc., NJ, USA) requiring ~~3 stool~~ samples from 3 separate stools. ~~While there is data to suggest that dietary restriction may be unnecessary,~~<sup>11</sup> ~~the program recommends avoiding only recommended dietary restriction is to avoid~~ vitamin C for 3 days prior to and during the collection period in order to minimize false negative results.

Approximately 75% of Ontario residents received their care via a patient enrolled model (PEMs) of care at the time of the study (2009).<sup>12</sup> PEMs comprise teams of family physicians who provide their enrolled patients with comprehensive health care and extended hours.<sup>13</sup> PEMs vary in terms of structure, services provided and remuneration

Tinmouth et al.  
Physician-linked mailed invitations for colorectal cancer screening

(varying from enhance fee-for-service to blended capitation). All Ontario physicians are remunerated for preventive care such as CRC screening however, PEM physicians are incented to a greater degree than those who are not in PEMs. Specifically, PEM physicians receive a \$7/patient fee for "FOBT distribution and counseling", a \$6.86/patient fee for "CRC screening management" and an annual "Colorectal cancer screening preventive care bonus" (\$220 to \$4000) depending on the proportion of enrolled patients who are up-to-date with FOBT (15-70%). The physician is entitled to the CRC screening management fee if the enrolled patient attends an appointment to discuss CRC screening, has declined the test verbally or in writing or if there has been no response after 2 written notices and a telephone call from the physician.<sup>14</sup>

A central tenet of organized screening programs is that all persons in the target population be invited to participate.<sup>8</sup> Implementation of this aspect of organized screening varyvaries: invitations may be sent with an FOBT kit, can include physician recommendation or may incorporate tailored messaging.<sup>15 16</sup> Some of these approaches, such as incorporation of physician recommendation, present significant implementation challenges for organized screening programs such as Ontario's.

In 2009, the CCC program conducted undertook the CCC Invitation Pilot (the "Pilot"), an evaluation that tested the technical feasibility of a centralized approach to sending physician-linked mailed invitations for CRC screening. In this paper, we describe the

Formatted: No underline

Tinmouth et al.  
Physician-linked mailed invitations for colorectal cancer screening

structure and the implementation of the Pilot. In addition, we report on participant and physician factors associated with response to mailed physician-linked invitations and on the effectiveness of these invitations in an Ontario's organized CRC screening program.

## METHODS

### The CCC Invitation Pilot – Implementation and Evaluation

The ~~Pilot was conducted by CCC~~ CCC program conducted the Pilot in November 2009 ~~in order to develop and test the technical infrastructure required for large scale centralized physician linked mailed invitations in Ontario.~~ For the Pilot, invitation letters were generated by the CCC program on behalf of 102 family physicians and sent to all their eligible enrolled patients. Just over 11,000 eligible patient participants were sent mailed invitations requesting they visit their family physician to obtain an FOBT kit or, if appropriate based on family history, a referral for colonoscopy. In this paper, we report on 2 studies using this cohort. Study 1 examines participant and physician factors associated with response to the mailed invitation among those who were sent the mailed invitation. Study 2 evaluates the effectiveness of the mailed invitation by comparing uptake of CRC screening among Study 1 participants compared to a matched control group. Ethics approval was obtained from the research ethics boards at Sunnybrook Health Sciences Centre and the Institute for Clinical Evaluative Sciences (ICES) and permission to use the Pilot data was obtained from Cancer Care Ontario's (CCO) Data

Tinmouth et al.  
Physician-linked mailed invitations for colorectal cancer screening

Access Committee. All analyses were conducted using SAS v.9 (SAS Institute, Cary, NC). A p-value of 0.05 was used to determine statistical significance.

### Data Sources

The Pilot study was conducted at ICES, which houses the administrative health records for all 12.43.5 million Ontarians. CCC program databases were linked to the ICES administrative databases using an encrypted version of the provincial health insurance number.

The ICES databases used include the Canadian Institute of Health Information (CIHI) databases, the Ontario Health Insurance Program (OHIP) Claims History Database, the Registered Persons Database (RPDB), the Ontario Cancer Registry, the ICES Physician Database, and the Client Agency Program Enrollment (CAPE) registry. The CIHI, OHIP, RPDB and the Ontario Cancer Registry and the ICES Physician Database ~~have been~~ are ~~previously~~ described elsewhere.<sup>17 18</sup> The CAPE registry tracks patients enrolled to physicians who participate in PEMs and is a centralized electronic record of the linkage between specific patients and their physicians.

~~Since its inception, the~~ CCC program has collected data related to the FOBT kits administered by the CCC program, including the results of these tests, on CRG screening since its inception using Laboratory Reporting Tool (LRT) ~~and comprises data~~

Tinmouth et al.  
Physician-linked mailed invitations for colorectal cancer screening

related to the FOBT kits administered by the CCC program, including the results of these tests.

### Study 1: Factors associated with response to the mailed invitation

Cohort Definition: For the Pilot, a convenience sample of physicians participating in PEM-type practices was recruited via CCO's Provincial Primary Care Cancer Network. Patients enrolled to these physicians, aged 50 to 74 years without a history of CRC and who were due for CRC screening (without a health administrative data record of recent FOBT (previous two years) or lower GI investigation including flexible sigmoidoscopy and colonoscopy (previous 5 years)), were eligible. For the Pilot mailing, CCC generated lists of patient participants eligible for CRC screening for each participating physician using CAPE, Ontario Cancer Registry, OHIP, CIRT and LRT. All persons who were sent an invitation were included in the cohort, regardless of whether the letter was returned to the sender.

The Mailing: Invitations were mailed in November 2009. The date of mailing was the index date. The letters were compiled centrally by the CCC program but were physician-linked; patient participants were sent a letter from their own physician, as indicated by their name at the bottom of the letter in an italicized font (Figure 1). The letter asked participants to visit their family physician for screening; it did not include an FOBT kit. The letter was accompanied by a CRC screening information brochure and sent in an

Tinmouth et al.  
Physician-linked mailed invitations for colorectal cancer screening

envelope with the family physician name in the front upper left corner. ~~For the purposes of the study,~~ Pilot physicians were not compensated for study participation, however, they were able to apply the letter towards meeting the requirements for the an equivalent amount to the CRC sScreening mManagement fee (\$6.86 per eligible enrolled patient) as Ontario PEM physicians are eligible for this fee for contacting the patient by mail regarding CRC screening.

Response to Mailed Invitation: We used a broad definition of response to the mailed invitation: any record of FOBT in either OHIP or in LRT within 6 months of the index date, regardless of result (including rejected kits). Up to 10% of FOBT done in the province are captured only ~~through in~~ OHIP, which does not have data on test results. We were not able to measure response in persons at increased risk of CRC as we do not have family history data available in the administrative databases.

Participant and Physician Factors: We characterized participants by age group, sex, comorbidity, median neighborhood income,<sup>19 20</sup> health region,<sup>21</sup> immigration status, and prior FOBT. ~~We measured comorbidity was measured~~ by counting the number of Aggregated Diagnosis Groups (ADGs) ~~using in the prior 12 months according to~~ the Johns Hopkins ACG® Case-Mix System in the prior 12 months.<sup>22</sup> ~~This system has been shown to accurately predict mortality in a general population ambulatory cohort in Ontario~~ was accurately predicted using this system.<sup>23</sup> We used date of registration in

Tinmouth et al.  
Physician-linked mailed invitations for colorectal cancer screening

the RPDB as a proxy measure for immigration status; participants were considered recent immigrants if their date of registration was within 5 years of the index date.<sup>24</sup>

Physicians were characterized according to age, sex, training location ([attended Canadian medical school/Canada](#) vs. outside of Canada), practice type, size of practice, age-eligible rate of colonoscopy or FOBT over prior 2 years as well as the age-eligible rate of annual physical exams or influenza vaccinations in the prior year. -All [participating](#) physicians were in PEMs; practice types included family health groups (FHGs, enhanced fee-for-service models), family health organizations or networks (FHO/FHNs, blended capitation models), FHO/FHN with family health team (FHO/FHN-FHT, interprofessional team model with a blended capitation fee structure) and other PEMs.<sup>25</sup> -We measured practice size as the number of enrolled patients stratified in a binary fashion ( $\leq 1800$  vs.  $>1800$  enrolled patients) as larger practice sizes have been shown to be associated with poorer preventative care.<sup>26</sup> For the remaining physician characteristics, we identified all enrolled and non-enrolled patients aged 50-74 years in their practices as of the index date. Age-eligible FOBT and colonoscopy rates were obtained for each Pilot physician by calculating the proportion of their age-eligible patients who had had an FOBT or colonoscopy in the 2 years prior to the index date. Similarly, we calculated their rates of age-eligible annual physical exams or influenza vaccine in the year prior to the index date. -These variables were derived in order to



Tinmouth et al.  
Physician-linked mailed invitations for colorectal cancer screening

estimate physician adherence to CRC screening and preventive medicine practices at baseline.

Analysis: The number and proportion of persons in the cohort who responded to the mailed invitation within 6 months were determined overall and by participant and physician characteristics. Multivariate logistic regression modeling was used to identify participant and physician factors associated with response to the mailed invitation. In order to account for potential clustering of participants within physicians, Generalized Estimating Equations (GEE)<sup>27</sup> were used in the model.

## Study 2: Evaluation of the effectiveness of mailed invitations

Overview and study participants: This was a matched double cohort analysis, comparing uptake of FOBT in those who were sent a mailed invitation (Pilot cohort) to a matched control group who were not sent a mailed invitation. -The control group comprised patients who were enrolled to PEM physicians who had not participated in the Pilot. Control participants received “usual care” ~~from~~ the CCC program in terms of screening promotion. As such, they ~~received~~ were eligible for screening via their primary care physician who ~~was~~ are eligible for the same financial incentives as the Pilot physicians. Control participants were not sent a centralized physician-linked invitation from the CCC program although their physicians could send them a mailed invitation at their own discretion.

Tinmouth et al.  
Physician-linked mailed invitations for colorectal cancer screening

The Pilot cohort comprised all members of the cohort described in Study 1 for whom a matched control could be identified. We identified potential controls as follows: 1) Pilot physicians were matched to non-Pilot physicians who were also practicing in PEMs in a 1:5 ratio using physician age, sex, size and practice type; 2) individuals enrolled to the selected control physicians were retained if they met the same inclusion/exclusion criteria as those in the intervention cohort (aged 50 to 74 years with no prior CRC who were due for CRC screening). As with the identification of eligible participants in the Pilot, we used CAPE, Ontario Cancer Registry, OHIP, CIRT and LRT to determine eligibility of potential control participants.

Propensity scores that modeled the probability of belonging to the Pilot group were calculated for each participant in the entire group (Pilot and control). The variables in this model included age (as a continuous measure), sex, co-morbidity, median neighborhood income quintile, health region, immigration status, and FOBT from 2 to 5 years prior.<sup>28 29</sup> Pilot participants were matched to controls in a 1:1 fashion based on propensity scores using a caliper width of 0.25. This methodology was implemented to balance the distribution of participant-level variables between the Pilot and control groups.

Tinmouth et al.  
Physician-linked mailed invitations for colorectal cancer screening

Response to mailed invitation: For our primary outcome, we defined response to the mailed invitation as in Study 1, a record of FOBT regardless of result, within 6 months of the index date. For our secondary outcome, response was defined as a record of either FOBT or colonoscopy within 6 months of the index date. For the purposes of this study, controls were assigned the same index date as their matched counterpart in the Pilot group.

Analysis: Standard differences between the Pilot participants and controls were calculated for the variables included in the propensity score. Important differences between the 2 groups were defined by a standardized difference exceeding 0.1.<sup>29 30</sup> In the primary analysis, we compared the number and proportion in the Pilot and control groups responding to the mailed invitation with FOBT using McNemar's test.<sup>29</sup> -We determined the number of invitations mailed in order to screen one additional person with FOBT. -We repeated the above analyses using our secondary outcome in order to determine if observed differences in FOBT uptake could be attributed to differences in colonoscopy uptake (i.e., participants had CRC screening but chose colonoscopy over FOBT). As the matching only accounted for participant-level variables, we repeated our analyses using conditional logistic regression in order to adjust for physician covariates (age, sex, practice type and size).

Tinmouth et al.  
Physician-linked mailed invitations for colorectal cancer screening

## RESULTS

### Study 1: Factors associated with response to the mailed invitation

There were 11,311 eligible patient participants associated with the 102 family physicians in the Pilot cohort. Nine participants were ~~excluded~~excluded, as we were unable to determine their health region and/or income quintile; this left 11,302 participants for the analysis. The majority of participants were 50 to 59 years of age, 52% were women, 48% had no or low co-morbidity and 14% had completed an FOBT from 2 to 5 years prior to the mailing. Two thirds of participants had a male physician, approximately half were part of a primary care team reimbursed via an enhanced fee-for-service arrangement and just under half were enrolled in larger practices (>1800 enrolled patients) (Table 1).

2503 (22%) completed an FOBT within 6 months of mailing. In the multivariate regression, the strongest participant factor associated with FOBT completion was prior FOBT use (2 to 5 years prior vs. > 5 years or never: OR 2.8, 95% C.I.: 2.5 to 3.3,  $p < 0.0001$ ). Other significant factors associated with FOBT completion included older participant age, greater co-morbidity, and having a female physician (Table 2).

### Study 2: Evaluation of the effectiveness of mailed invitations

Of the 11,302 participants in Study 1, 10,652 were successfully matched to 10,652 controls using propensity scores. Standardized differences for the participant

Tinmouth et al.  
Physician-linked mailed invitations for colorectal cancer screening

characteristics included in the propensity score were all  $<0.1$ , indicating that the two cohorts were well matched for measurable potential confounders (Table 3).

Pilot participants were significantly more likely than controls to complete FOBT alone (2387 (22%) versus 854 (8%),  $p<0.0001$ ) and FOBT or colonoscopy (2664 (25%) vs. 1191 (11%),  $p<0.0001$ ) within 6 months of mailing. The association between the mailed invitation and CRC screening participation (either FOBT alone or FOBT or colonoscopy) remained after adjusting for physician level characteristics (Table 4).

## DISCUSSION

In the current study, we have demonstrated that physician-linked mailed invitations are both feasible and effective in the context of a large organized, population-based screening program; only 7 letters would need to be sent in order to screen one additional person. Furthermore, we have found that older participants, those with greater comorbidity, those who have previously been screened and those with female physicians were more likely to respond to this type of invitation. Our findings are of particular interest to other jurisdictions planning or who already have organized CRC screening.

In other published studies of mailed invitations, an FOBT kit is often included with the invitation. Three studies done outside organized screening programs have found physician-linked invitations superior to non-linked invitations; 2 of these studies included

Tinmouth et al.  
Physician-linked mailed invitations for colorectal cancer screening

an FOBT kit,<sup>31 32</sup> and the third study did not.<sup>33</sup> Other studies have examined mailed invitations with FOBT kits in the context of primary care practices in the USA.<sup>34-36</sup> While the results from these trials were largely supportive of mailed invitations, kit inclusion can make it difficult to separate the convenience of receiving the FOBT kit directly by mail from the impact of an invitation from one's own physician.

Our study demonstrates the effectiveness and feasibility of physician-linked invitations in the context of a large organized CRC screening program with an estimated target population of over 3 million persons. Implementation in this context confers challenges in terms of technological infra-structure, privacy and regulatory issues. There are 2 studies (from the United Kingdom<sup>37</sup> and Italy<sup>38</sup>) that have reported on mailed invitations in the context of organized colorectal cancer screening programs and found them to be effective. Both studies included FOBT kits and one studied the impact of physician endorsement specifically.<sup>37</sup> Our findings are important because they support a potentially more cost-effective approach that avoids wasting kits that are mailed but not used.

Our results highlight the critical role of physician recommendation, a finding supported by others. For example, in the NHS Bowel Cancer Screening Programme (BCSP) currently, the primary care physician receives the result but is not directly involved in the mailed invitation or the actual screening. Recently, a randomized controlled trial

Tinmouth et al.  
Physician-linked mailed invitations for colorectal cancer screening

conducted in the context of the BCSP showed that an endorsement letter from the primary care provider increased participation by 6%.<sup>37</sup> —In 2 studies from Australia, endorsement improved initial participation<sup>31 32</sup> and over 4 successive screening rounds.<sup>32</sup>

Uptake of FOBT in Ontario is lower than some organized CRC screening programs in other countries. For example, 30% of Ontarians were up-to-date with FOBT in 2008-9<sup>39</sup> compared to 52% participation in the United Kingdom program by October 2008,<sup>40</sup> 54% in the Italian program in 2007,<sup>41</sup> and 54% in the New Zealand pilot program in 2012.<sup>42</sup> However, in the latter countries, there is very little, if any, opportunistic CRC screening using colonoscopy whereas Ontario's program operates in a hybrid environment where opportunistic colonoscopy is available as the initial screening test in persons at average risk. It has been noted that uptake of FOBT may be lower in settings, such as Ontario's or Australia's,<sup>43</sup> where opportunistic screening is available.<sup>44</sup> The findings from the current study indicate that physician-linked invitations for CRC screening can be effective in increasing uptake of FOBT in programs that operate in the context of opportunistic colonoscopy for average risk screening.

Our study has several limitations. ~~As mentioned above~~First, we are unable to determine family history using Ontario administrative data. A second limitation is that a single generic letter was used. Tailored letters with key messages for specific subgroups may

Tinmouth et al.  
Physician-linked mailed invitations for colorectal cancer screening

be more effective,<sup>16</sup> — an approach that may be relevant in Ontario as we did find that response to the letter appeared to differ in various subgroups. Additionally, while our findings are promising, there are challenges to ~~widespread implementation~~ adoption by in other population-based screening programs, including the ~~requirement~~ need for a centralized database that links patients to their physicians. Finally, implementation of this strategy in population-based screening is predicated on physician acceptability and agreement. While we have found that this approach is acceptable in principle to many Ontario physicians,<sup>45</sup> processes to confirm individual physician agreement have not been determined for the entire CCC program which comprises an estimated 7000 primary care physicians.

## CONCLUSIONS

In summary, we have demonstrated that physician-linked mailed invitations for CRC screening, even without the inclusion of an FOBT kit, can have substantial effect on participation in an organized CRC screening program and that it is technically feasible to centrally organize and mail physician-linked invitations on a large scale. Organized screening programs, which often use unlinked invitations, should consider adopting this approach given its demonstrated effectiveness and feasibility.

## ACKNOWLEDGEMENTS



Tinmouth et al.  
Physician-linked mailed invitations for colorectal cancer screening

The authors would like to acknowledge Peter Austin PhD for his expert statistic advice.

They also wish to acknowledge the support of the Institutes for Clinical Evaluative Sciences, the Ontario Ministry of Health and Long Term Care and CCO. The opinions, results and conclusions reported in this paper are those of the authors and are independent from the funding sources. No endorsement by Institutes for Clinical Evaluative Sciences, the Ontario Ministry of Health and Long Term Care and CCO is intended or should be inferred.

#### COMPETING INTERESTS STATEMENT

Dr. Tinmouth is the Lead Scientist for the ColonCancerCheck program and Dr. Rabeneck oversees the ColonCancerCheck program in her capacity as the Vice-President, Cancer Prevention and Control at CCO. None of the other authors have any conflicts of interest to report.

#### FUNDING STATEMENT

This study was conducted with ~~the funding~~ support ~~of from~~ the Ontario Institute for Cancer Research and CCO's Health Services Research Network, which is independent of the ColonCancerCheck program, ~~provided funding for this work~~. This work was also supported in part by a grant from the Canadian Institutes for Health Research (grant # CST-85478). -Dr. Tinmouth was supported by a Canadian Institutes of Health Research New Investigator Award during the period of this study.

Tinmouth et al.  
Physician-linked mailed invitations for colorectal cancer screening

**AUTHOR CONTRIBUTION:**

Authors contributed substantially to each of the following areas:

-conception and design (JT, LFP, LR) or analysis and interpretation of data (JT, NB,

LFP, LR, RS, LY)

-drafting the article (JT) or revising it critically for important intellectual content (JT, NB,

LFP, LR, RS, LY)

-final approval of the version to be published (JT, NB, LFP, LR, RS, LY)

Tinmouth et al.  
Physician-linked mailed invitations for colorectal cancer screening

## REFERENCES

1. Canadian Cancer Society's Steering Committee on Cancer Statistics. Canadian Cancer Statistics 2013. Toronto, ON: Canadian Cancer Society, 2013.
2. Mandel JS, Church TR, Bond JH, et al. The effect of fecal occult-blood screening on the incidence of colorectal cancer. *N Engl J Med* 2000;343(22):1603-7.
3. Hardcastle JD, Chamberlain JO, Robinson MH, et al. Randomised controlled trial of faecal-occult-blood screening for colorectal cancer. *Lancet* 1996;348(9040):1472-7.
4. Kronborg O, Fenger C, Olsen J, et al. Randomised study of screening for colorectal cancer with faecal-occult-blood test. *Lancet* 1996;348(9040):1467-71.
5. Atkin WS, Edwards R, Kralj-Hans I, et al. Once-only flexible sigmoidoscopy screening in prevention of colorectal cancer: a multicentre randomised controlled trial. *Lancet* 2010;375(9726):1624-33.
6. Segnan N, Armaroli P, Bonelli L, et al. Once-Only Sigmoidoscopy in Colorectal Cancer Screening: Follow-up Findings of the Italian Randomized Controlled Trial—SCORE *J Natl Cancer Inst* 2011;103(17):1310-22
7. Schoen RE, Pinsky PF, Weissfeld JL, et al. Colorectal-cancer incidence and mortality with screening flexible sigmoidoscopy. *N Engl J Med* 2012;366(25):2345-57.
8. Miles A, Cockburn J, Smith RA, et al. A Perspective from Countries Using Organized Screening Programs. *Cancer* 2004;104(5 Suppl):1201-13.
9. International Cancer Screening Network. Inventory of Colorectal Cancer Screening Activities in ICSN Countries, May 2008. Secondary Inventory of Colorectal Cancer Screening Activities in ICSN Countries, May 2008. Feb 9 2009. <http://appliedresearch.cancer.gov/icsn/colorectal/screening.html>.
10. Anonymous. Colon Cancer Check: Ontario's colorectal cancer screening program. Secondary Colon Cancer Check: Ontario's colorectal cancer screening program Feb 2, 2012. <http://health.gov.on.ca/en/public/programs/coloncancercheck/>.
11. Pignone M, Campbell MK, Carr C, et al. Meta-analysis of dietary restriction during fecal occult blood testing. *Eff Clin Pract* 2001;4(4):150-6.
12. Glazier RH, Zagorski BM, Rayner J. Comparison of Primary Care Models in Ontario by Demographics, Case Mix and Emergency Department Use, 2008/09 to 2009/10. ICES Investigative Report. Toronto: Institute for Clinical Evaluative Sciences, 2012.
13. HealthForceOntario. Family Practice Models. Secondary Family Practice Models May 3 2013. [http://www.healthforceontario.ca/Work/OutsideOntario/PhysiciansOutsideOntario/PractisingInOntario/family\\_practice\\_models.aspx](http://www.healthforceontario.ca/Work/OutsideOntario/PhysiciansOutsideOntario/PractisingInOntario/family_practice_models.aspx).
14. Ontario Ministry of Health and Long-Term Care. Bulletin 4482: ColonCancerCheck Physician Incentives. . Secondary Bulletin 4482: ColonCancerCheck Physician Incentives. July 22, 2008.

Field Code Changed

Tinmouth et al.  
Physician-linked mailed invitations for colorectal cancer screening

- <http://www.health.gov.on.ca/en/pro/programs/ohip/bulletins/4000/bul4482.pdf>.
15. Khalid-de Bakker C, Jonkers D, Smits K, et al. Participation in colorectal cancer screening trials after first-time invitation: a systematic review. *Endoscopy* 2011;43(12):1059-86.
  16. Rawl SM, Skinner CS, Perkins SM, et al. Computer-delivered tailored intervention improves colon cancer screening knowledge and health beliefs of African-Americans. *Health Educ Res* 2012;27(5):868-85.
  17. Alharbi O, Rabeneck L, Sutradhar R, et al. A population-based analysis of outpatient colonoscopy in adults assisted by an anesthesiologist. *Anesthesiology* 2009;111(4):734-40.
  18. Robles SC, Marrett LD, Clarke EA, et al. An application of capture-recapture methods to the estimation of completeness of cancer registration. *J Clin Epidemiol* 1988;41(5):495-501.
  19. Alter DA, Naylor CD, Austin P, et al. Effects of socioeconomic status on access to invasive cardiac procedures and on mortality after acute myocardial infarction. *N Engl J Med* 1999;341(18):1359-67.
  20. Singh SM, Paszat LF, Li C, et al. Association of socioeconomic status and receipt of colorectal cancer investigations: a population-based retrospective cohort study. *Can Med Assoc J* 2004;171(5):461-5.
  21. Anonymous. Ontario's Local Health Integration Networks. Secondary Ontario's Local Health Integration Networks May 30 2013. <http://www.lhins.on.ca/home.aspx>.
  22. Anonymous. The Johns Hopkins University ACG Case-Mix System. Secondary The Johns Hopkins University ACG Case-Mix System 2012. <http://www.acg.jhsph.edu/>.
  23. Austin PC, van Walraven C, Wodchis WP, et al. Using the Johns Hopkins Aggregated Diagnosis Groups (ADGs) to predict mortality in a general adult population cohort in Ontario, Canada. *Med Care* 2011;49(10):932-9.
  24. Ray JG, Vermeulen MJ, Schull MJ, et al. Results of the Recent Immigrant Pregnancy and Perinatal Long-term Evaluation Study (RIPPLES). *Can Med Assoc J* 2007;176(10):1419-26.
  25. Glazier RH, Klein-Geltink J, Kopp A, et al. Capitation and enhanced fee-for-service models for primary care reform: a population-based evaluation. *Can Med Assoc J* 2009;180(11):E72-E81.
  26. Dahrouge S, Hogg WE, Russell G, et al. Impact of remuneration and organizational factors on completing preventive manoeuvres in primary care practices. *Can Med Assoc J* 2012;184(2):E135-43.
  27. Liang K, Zeger SL. Longitudinal data analysis using generalized linear models. *Biometrika* 1986;73:13-22.

Tinmouth et al.

Physician-linked mailed invitations for colorectal cancer screening

28. D'Agostino RB, Jr. Propensity score methods for bias reduction in the comparison of a treatment to a non-randomized control group. *Stat Med* 1998;17(19):2265-81.
29. Austin PC. An Introduction to Propensity Score Methods for Reducing the Effects of Confounding in Observational Studies. *Multivariate Behav Res* 2011;46(3):399-424.
30. Normand ST, Landrum MB, Guadagnoli E, et al. Validating recommendations for coronary angiography following acute myocardial infarction in the elderly: a matched analysis using propensity scores. *J Clin Epidemiol* 2001;54(4):387-98.
31. Cole SR, Young GP, Byrne D, et al. Participation in screening for colorectal cancer based on a faecal occult blood test is improved by endorsement by the primary care practitioner. *J Med Screen* 2002;9(4):147-52.
32. Zajac IT, Whibley AH, Cole SR, et al. Endorsement by the primary care practitioner consistently improves participation in screening for colorectal cancer: a longitudinal analysis. *J Med Screen* 2010;17(1):19-24.
33. Grazzini G, Castiglione G, Isu A, et al. Colorectal cancer screening by fecal occult blood testing: results of a population-based experience. *Tumori* 2000;86(5):384-8.
34. Myers RE, Sifri R, Hyslop T, et al. A randomized controlled trial of the impact of targeted and tailored interventions on colorectal cancer screening. *Cancer* 2007;110(9):2083-91.
35. Sequist TD, Zaslavsky AM, Marshall R, et al. Patient and physician reminders to promote colorectal cancer screening: a randomized controlled trial. *Arch Intern Med* 2009;169(4):364-71.
36. Walsh JM, Salazar R, Terdiman JP, et al. Promoting use of colorectal cancer screening tests. Can we change physician behavior? *J Gen Intern Med* 2005;20(12):1097-101.
37. Hewitson P, Ward AM, Heneghan C, et al. Primary care endorsement letter and a patient leaflet to improve participation in colorectal cancer screening: results of a factorial randomised trial. *Br J Cancer* 2011;105(4):475-80.
38. Giorgi Rossi P, Grazzini G, Anti M, et al. Direct mailing of faecal occult blood tests for colorectal cancer screening: a randomized population study from Central Italy. *J Med Screen* 2011;18(3):121-7.
39. Cancer Quality Council of Ontario. Colorectal Cancer Screening: Participation. . . Secondary Colorectal Cancer Screening: Participation. 2013. [http://www.csqi.on.ca/cms/one.aspx?portalId=258922&pageId=273238 -.UijqNMakrmQ](http://www.csqi.on.ca/cms/one.aspx?portalId=258922&pageId=273238-.UijqNMakrmQ).
40. Logan RF, Patnick J, Nickerson C, et al. Outcomes of the Bowel Cancer Screening Programme (BCSP) in England after the first 1 million tests. *Gut* 2012;61(10):1439-46.
41. Parente F, Boemo C, Ardizzoia A, et al. Outcomes and cost evaluation of the first two rounds of a colorectal cancer screening program based on

Tinmouth et al.  
Physician-linked mailed invitations for colorectal cancer screening

- immunochemical fecal occult blood test in northern Italy. *Endoscopy* 2013;45(1):27-34.
42. New Zealand Ministry of Health. Bowel Screening Pilot January to June 2012 results. Secondary Bowel Screening Pilot January to June 2012 results 26 April 2013. <http://www.health.govt.nz/our-work/diseases-and-conditions/cancer-programme/bowel-cancer-programme/bowel-screening-pilot/bowel-screening-pilot-results/bowel-screening-pilot-january-june-2012-results>.
43. Zajac IT, Flight I, Turnbull D, et al. Self-reported bowel screening rates in older Australians and the implications for public health screening programs. *Australas Med J* 2013;6(8):411-7.
44. Moss SM, Ancelle-Park R, Brenner H. Evaluation and interpretation of screening outcomes. In: Patnick J, Segnan N, von Karsa L, eds. European guidelines for quality assurance in colorectal cancer screening and diagnosis. Luxembourg: International Agency for Research on Cancer 2010.
45. Tinmouth J, Ritvo P, McGregor SE, et al. ColonCancerCheck Primary Care Invitation Pilot project: family physician perceptions. *Can Fam Physician* 2012;58(10):e570-7.

Tinmouth et al.  
Physician-linked mailed invitations for colorectal cancer screening

## Tables.

Table 1. Patient participant and physician characteristics for Study 1

|                                              | FOBT within 6 months<br>(n=2,503) | No FOBT within 6 months<br>(n=8,799) | Total<br>(n=11,302) |
|----------------------------------------------|-----------------------------------|--------------------------------------|---------------------|
| <b>Patient participants</b>                  |                                   |                                      |                     |
| Age group in years, No. (%)                  |                                   |                                      |                     |
| 50-59                                        | 1,279 (51%)                       | 5,384 (61%)                          | 6,663 (59%)         |
| 60-69                                        | 894 (36%)                         | 2,637 (30%)                          | 3,531 (31%)         |
| 70-74                                        | 330 (13%)                         | 778 (9%)                             | 1,108 (10%)         |
| Sex, No. (%)                                 |                                   |                                      |                     |
| Female                                       | 1,299 (52%)                       | 4,554 (52%)                          | 5,853 (52%)         |
| Male                                         | 1,204 (48%)                       | 4,245 (48%)                          | 5,449 (48%)         |
| Co-morbidity*, No. of ADGs (%)               |                                   |                                      |                     |
| 0                                            | 257 (10%)                         | 1,279 (15%)                          | 1,536 (14%)         |
| 1-2                                          | 828 (33%)                         | 3,044 (35%)                          | 3,872 (34%)         |
| 3-4                                          | 712 (28%)                         | 2,241 (25%)                          | 2,953 (26%)         |
| 5-6                                          | 393 (16%)                         | 1,224 (14%)                          | 1,617 (14%)         |
| 7+                                           | 313 (13%)                         | 1,011 (11%)                          | 1,324 (12%)         |
| Median neighborhood income quintile, No. (%) |                                   |                                      |                     |
| Rural                                        | 394 (16%)                         | 1,431 (16%)                          | 1,825 (16%)         |
| Low Urban                                    | 360 (14%)                         | 1,375 (16%)                          | 1,735 (15%)         |
| 2                                            | 402 (16%)                         | 1,418 (16%)                          | 1,820 (16%)         |
| 3                                            | 429 (17%)                         | 1,430 (16%)                          | 1,859 (16%)         |
| 4                                            | 432 (17%)                         | 1,552 (18%)                          | 1,984 (18%)         |
| High Urban                                   | 486 (19%)                         | 1,593 (18%)                          | 2,079 (18%)         |
| Health region, No. (%)                       |                                   |                                      |                     |
| Erie St.Clair                                | 125 (5%)                          | 337 (4%)                             | 462 (4%)            |
| South West                                   | 284 (11%)                         | 823 (9%)                             | 1,107 (10%)         |
| Waterloo Wellington                          | 76 (3%)                           | 251 (3%)                             | 327 (3%)            |
| Hamilton Niagara                             | 289 (12%)                         | 976 (11%)                            | 1,265 (11%)         |
| Central West                                 | 138 (6%)                          | 482 (5%)                             | 620 (5%)            |
| Mississauga Halton                           | 22 (1%)                           | 120 (1%)                             | 142 (1%)            |
| Toronto Central                              | 111 (4%)                          | 392 (4%)                             | 503 (4%)            |
| Central                                      | 24 (1%)                           | 177 (2%)                             | 201 (2%)            |
| Central East                                 | 361 (14%)                         | 1,282 (15%)                          | 1,643 (15%)         |
| South East                                   | 162 (6%)                          | 697 (8%)                             | 859 (8%)            |
| Champlain                                    | 219 (9%)                          | 676 (8%)                             | 895 (8%)            |
| North Simcoe-Muskoka                         | 77 (3%)                           | 188 (2%)                             | 265 (2%)            |
| North East                                   | 291 (12%)                         | 1,118 (13%)                          | 1,409 (12%)         |
| North West                                   | 324 (13%)                         | 1,280 (15%)                          | 1,604 (14%)         |

Tinmouth et al.  
Physician-linked mailed invitations for colorectal cancer screening

|                                                              |             |             |             |
|--------------------------------------------------------------|-------------|-------------|-------------|
| Recent immigrant, No. (%)                                    | 23 (1%)     | 88 (1%)     | 111 (1%)    |
| FOBT 2 to 5 years prior to mailing, No. (%)                  | 643 (26%)   | 905 (10%)   | 1,548 (14%) |
| <b>Physician</b>                                             |             |             |             |
| Median age in years (IQR)                                    | 52 (45-59)  | 53 (46-59)  | 52 (45-59)  |
| Sex, No. (%)                                                 |             |             |             |
| Female                                                       | 936 (37%)   | 3,044 (35%) | 3,980 (35%) |
| Male                                                         | 1,567 (63%) | 5,755 (65%) | 7,322 (65%) |
| Training location, No. (%)                                   |             |             |             |
| Outside Canada                                               | 312 (12%)   | 1,196 (14%) | 1,508 (13%) |
| In Canada                                                    | 2,191 (88%) | 7,603 (86%) | 9,794 (87%) |
| Practice type, No. (%)                                       |             |             |             |
| FHG                                                          | 1,082 (43%) | 4,266 (48%) | 5,348 (47%) |
| FHO/FHN                                                      | 432 (17%)   | 1,456 (17%) | 1,888 (17%) |
| FHO/FHN-FHT                                                  | 881 (35%)   | 2,620 (30%) | 3,501 (31%) |
| Other PEM                                                    | 108 (4%)    | 457 (5%)    | 565 (5%)    |
| Practice size (enrolled patients), No. (%)                   |             |             |             |
| >1800 patients                                               | 1,105 (44%) | 4,104 (47%) | 5,209 (46%) |
| Age-eligible rate of colonoscopy quintile, No. (%)           |             |             |             |
| Low                                                          | 485 (19%)   | 1,619 (18%) | 2,104 (19%) |
| 2                                                            | 548 (22%)   | 1,940 (22%) | 2,488 (22%) |
| 3                                                            | 637 (25%)   | 2,279 (26%) | 2,916 (26%) |
| 4                                                            | 477 (19%)   | 1,696 (19%) | 2,173 (19%) |
| High                                                         | 356 (14%)   | 1,265 (14%) | 1,621 (14%) |
| Age-eligible rate of FOBT quintile, No. (%)                  |             |             |             |
| Low                                                          | 487 (19%)   | 1,888 (21%) | 2,375 (21%) |
| 2                                                            | 504 (20%)   | 1,886 (21%) | 2,390 (21%) |
| 3                                                            | 533 (21%)   | 1,890 (21%) | 2,423 (21%) |
| 4                                                            | 522 (21%)   | 1,680 (19%) | 2,202 (19%) |
| High                                                         | 457 (18%)   | 1,455 (17%) | 1,912 (17%) |
| Age-eligible rate of annual physical exams quintile, No. (%) |             |             |             |
| Low                                                          | 496 (20%)   | 2,009 (23%) | 2,505 (22%) |
| 2                                                            | 490 (20%)   | 1,625 (18%) | 2,115 (19%) |
| 3                                                            | 472 (19%)   | 1,638 (19%) | 2,110 (19%) |
| 4                                                            | 509 (20%)   | 1,686 (19%) | 2,195 (19%) |
| High                                                         | 536 (21%)   | 1,841 (21%) | 2,377 (21%) |



1  
2  
3  
4  
5  
6  
7  
8  
9  
10  
11  
12  
13  
14  
15  
16  
17  
18  
19  
20  
21  
22  
23  
24  
25  
26  
27  
28  
29  
30  
31  
32  
33  
34  
35  
36  
37  
38  
39  
40  
41  
42  
43  
44  
45  
46  
47  
48  
49  
50  
51  
52  
53  
54  
55  
56  
57  
58  
59  
60

Tinmouth et al.  
Physician-linked mailed invitations for colorectal cancer screening

| Age-eligible rate of influenza vaccine quintile, No. (%) |           |             |             |
|----------------------------------------------------------|-----------|-------------|-------------|
| Low                                                      | 548 (22%) | 1,997 (23%) | 2,545 (23%) |
| 2                                                        | 549 (22%) | 1,765 (20%) | 2,314 (20%) |
| 3                                                        | 435 (17%) | 1,930 (22%) | 2,365 (21%) |
| 4                                                        | 485 (19%) | 1,770 (20%) | 2,255 (20%) |
| High                                                     | 486 (19%) | 1,337 (15%) | 1,823 (16%) |

\*Co-morbidity scored using number of Aggregated Diagnosis Groups (ADGs) using the Johns Hopkins Case Mix System

FHG = family health group

FHO/FHN = family health organizations or networks

Other PEM = other patient enrolled model of care

FOBT = fecal occult blood test

peer review only

Tinmouth et al.  
Physician-linked mailed invitations for colorectal cancer screening

Table 2. Multivariate logistic regression analysis using Generalized Estimating Equations for the characteristics of participants and physicians associated with completing an FOBT within 6 months of the mailing date.

| Participants                        | Odds ratio (95% C.I.) | P-value |
|-------------------------------------|-----------------------|---------|
| Age group, years                    |                       |         |
| 50-59                               | 0.6 (0.5, 0.8)        | <.0001  |
| 60-69                               | 0.8 (0.7, 1.0)        | NS      |
| 70-74                               | Reference             | N/A     |
| Sex                                 |                       |         |
| Female                              | 0.9 (0.9, 1.0)        | NS      |
| Male                                | Reference             | N/A     |
| Co-morbidity*, No. of ADGs          |                       |         |
| 0                                   | 0.7 (0.6, 0.8)        | 0.0002  |
| 1-2                                 | 0.9 (0.7, 1.0)        | NS      |
| 3-4                                 | 1.0 (0.9, 1.2)        | NS      |
| 5-6                                 | 1.0 (0.9, 1.2)        | NS      |
| 7+                                  | Reference             | N/A     |
| Median neighborhood income quintile |                       |         |
| Rural                               | 0.9 (0.7, 1.1)        | NS      |
| Low Urban                           | 0.9 (0.7, 1.0)        | NS      |
| 2                                   | 1.0 (0.8, 1.1)        | NS      |
| 3                                   | 1.0 (0.9, 1.1)        | NS      |
| 4                                   | 0.9 (0.8, 1.1)        | NS      |
| High Urban                          | Reference             | N/A     |
| Health region                       |                       |         |
| Erie St.Clair                       | 1.3 (0.9, 1.8)        | NS      |
| South West                          | 0.9 (0.6, 1.4)        | NS      |
| Waterloo Wellington                 | 0.8 (0.6, 1.2)        | NS      |
| Hamilton Niagara                    | 0.9 (0.6, 1.2)        | NS      |
| Central West                        | 1.0 (0.7, 1.4)        | NS      |
| Mississauga Halton                  | 0.6 (0.3, 1.2)        | NS      |
| Toronto Central                     | 0.8 (0.6, 1.2)        | NS      |
| Central                             | 0.5 (0.4, 0.7)        | 0.0004  |
| South East                          | 0.8 (0.54, 1.30-7)    | NS      |
| Champlain                           | 1.0 (0.7, 1.4)        | NS      |
| North Simcoe-Muskoka                | 0.9 (0.6, 1.4)        | NS      |
| North East                          | 1.1 (0.7, 1.5)        | NS      |
| North West                          | 0.7 (0.5, 1.0)        | 0.03    |
| Central East                        | Reference             | N/A     |
| Recency of immigration              |                       |         |
| Remote or non-immigrant             | 1.0 (0.6, 1.6)        | NS      |
| Recent immigrant                    | Reference             | N/A     |
| Prior FOBT Use                      |                       |         |
| 2 to 5 years prior to mailing       | 2.8 (2.5, 3.3)        | <.0001  |

Tinmouth et al.  
Physician-linked mailed invitations for colorectal cancer screening

|                                                     |                |      |
|-----------------------------------------------------|----------------|------|
| > 5 years or never                                  | Reference      |      |
| <b>Physician</b>                                    |                |      |
| Increasing age (per year)                           | 1.0 (1.0, 1.0) | NS   |
| Sex                                                 |                |      |
| Female                                              | 1.3 (1.0, 1.5) | 0.02 |
| Male                                                | Reference      | N/A  |
| Training location                                   |                |      |
| In Canada                                           | 0.9 (0.7, 1.2) | NS   |
| Outside Canada                                      | Reference      | N/A  |
| Practice type                                       |                |      |
| FHG                                                 | 0.9 (0.7, 1.1) | NS   |
| FHO/FHN                                             | 0.8 (0.6, 1.1) | NS   |
| Other PEM                                           | 0.7 (0.4, 1.0) | 0.05 |
| FHO/FHN-FHT                                         | Reference      | N/A  |
| Practice size (enrolled patients)                   |                |      |
| ≤ 1800 patients                                     | 1.1 (0.9, 1.3) | NS   |
| > 1800 patients                                     | Reference      | N/A  |
| Age-eligible rate of colonoscopy quintile           |                |      |
| Low                                                 | 1.1 (0.8, 1.5) | NS   |
| 2                                                   | 1.2 (1.0, 1.6) | NS   |
| 3                                                   | 1.0 (0.8, 1.2) | NS   |
| 4                                                   | 1.0 (0.8, 1.3) | NS   |
| High                                                | Reference      | N/A  |
| Age-eligible rate of FOBT quintile                  |                |      |
| 2                                                   | 0.9 (0.6, 1.3) | NS   |
| 3                                                   | 0.9 (0.7, 1.2) | NS   |
| 4                                                   | 1.1 (0.8, 1.4) | NS   |
| High                                                | 0.9 (0.7, 1.3) | NS   |
| Low                                                 | Reference      | N/A  |
| Age-eligible rate of annual physical exams quintile |                |      |
| 2                                                   | 1.4 (0.9, 2.0) | NS   |
| 3                                                   | 1.3 (0.9, 1.8) | NS   |
| 4                                                   | 1.3 (0.9, 1.8) | NS   |
| High                                                | 1.1 (0.8, 1.5) | NS   |
| Low                                                 | Reference      | N/A  |
| Age-eligible rate of influenza vaccine quintile     |                |      |
| 2                                                   | 1.0 (0.8, 1.2) | NS   |
| 3                                                   | 0.8 (0.6, 1.0) | 0.02 |
| 4                                                   | 0.9 (0.7, 1.2) | NS   |
| High                                                | 1.3 (1.0, 1.7) | NS   |
| Low                                                 | Reference      | N/A  |

\*Co-morbidity scored using number of Aggregated Diagnosis Groups (ADGs) using the Johns Hopkins Case Mix System

FHG = family health group

FHO/FHN = family health organizations or networks

1  
2  
3  
4  
5  
6  
7  
8  
9  
10  
11  
12  
13  
14  
15  
16  
17  
18  
19  
20  
21  
22  
23  
24  
25  
26  
27  
28  
29  
30  
31  
32  
33  
34  
35  
36  
37  
38  
39  
40  
41  
42  
43  
44  
45  
46  
47  
48  
49  
50  
51  
52  
53  
54  
55  
56  
57  
58  
59  
60

Tinmouth et al.  
Physician-linked mailed invitations for colorectal cancer screening

Other PEM = other patient enrolled model of care  
NS = not significant  
N/A - not applicable  
FOBT = fecal occult blood test

For peer review only

Tinmouth et al.  
Physician-linked mailed invitations for colorectal cancer screening

Table 3. Characteristics of the 2 cohorts matched by propensity score in Study 2

|                                                 | Pilot participants<br>(n=10,652) | Control participants<br>(n=10,652) | Standardized<br>Difference* |
|-------------------------------------------------|----------------------------------|------------------------------------|-----------------------------|
| <b>Participants</b>                             |                                  |                                    |                             |
| Age group in years, No. (%)                     |                                  |                                    |                             |
| 50-59                                           | 6,248 (59%)                      | 6,324 (59%)                        | 0.01                        |
| 60-69                                           | 3,342 (31%)                      | 3,316 (31%)                        | 0.01                        |
| 70-74                                           | 1,062 (10%)                      | 1,012 (10%)                        | 0.02                        |
| Sex, No. (%)                                    |                                  |                                    |                             |
| Female                                          | 5548 (52%)                       | 5477 (51%)                         | 0.01                        |
| Male                                            | 5,104 (48%)                      | 5,175 (49%)                        | 0.01                        |
| Co-morbidity**, No. of ADGs (%)                 |                                  |                                    |                             |
| 0                                               | 1,462 (14%)                      | 1,425 (13%)                        | 0.01                        |
| 1-2                                             | 3,647 (34%)                      | 3,716 (35%)                        | 0.01                        |
| 3-4                                             | 2,764 (26%)                      | 2,835 (27%)                        | 0.02                        |
| 5-6                                             | 1,536 (14%)                      | 1,473 (14%)                        | 0.02                        |
| 7+                                              | 1,243 (12%)                      | 1,203 (11%)                        | 0.01                        |
| Median neighborhood income quintile,<br>No. (%) |                                  |                                    |                             |
| Rural                                           | 1,825 (17%)                      | 1,889 (18%)                        | 0.02                        |
| Low Urban                                       | 1,628 (15%)                      | 1,699 (16%)                        | 0.02                        |
| 2                                               | 1,698 (16%)                      | 1,728 (16%)                        | 0.01                        |
| 3                                               | 1,728 (16%)                      | 1,681 (16%)                        | 0.01                        |
| 4                                               | 1,831 (17%)                      | 1,753 (16%)                        | 0.02                        |
| High Urban                                      | 1,942 (18%)                      | 1,902 (18%)                        | 0.01                        |
| Health region, No. (%)                          |                                  |                                    |                             |
| Erie St.Clair                                   | 462 (4%)                         | 423 (4%)                           | 0.02                        |
| South West                                      | 1,107 (10%)                      | 1,114 (10%)                        | 0                           |
| Waterloo Wellington                             | 327 (3%)                         | 343 (3%)                           | 0.01                        |
| Hamilton Niagara                                | 1,265 (12%)                      | 1,290 (12%)                        | 0.01                        |
| Central West                                    | 620 (6%)                         | 580 (5%)                           | 0.02                        |
| Mississauga Halton                              | 142 (1%)                         | 144 (1%)                           | 0                           |
| Toronto Central                                 | 503 (5%)                         | 478 (4%)                           | 0.01                        |
| Central                                         | 201 (2%)                         | 209 (2%)                           | 0.01                        |
| Central East                                    | 1,643 (15%)                      | 1,702 (16%)                        | 0.02                        |
| South East                                      | 859 (8%)                         | 891 (8%)                           | 0.01                        |
| Champlain                                       | 895 (8%)                         | 904 (8%)                           | 0                           |
| North Simcoe-Muskoka                            | 265 (2%)                         | 242 (2%)                           | 0.01                        |
| North East                                      | 1,409 (13%)                      | 1,378 (13%)                        | 0.01                        |
| North West                                      | 954 (9%)                         | 954 (9%)                           | 0                           |
| Recent immigrant, No. (%)                       | 111 (1%)                         | 105 (1%)                           | 0.01                        |
| FOBT 2 to 5 years prior to mailing, No.<br>(%)  | 1,476 (14%)                      | 1,240 (12%)                        | 0.07                        |
| <b>Physician</b>                                |                                  |                                    |                             |

Tinmouth et al.  
Physician-linked mailed invitations for colorectal cancer screening

|                                            |             |             |     |
|--------------------------------------------|-------------|-------------|-----|
| Median age in years (IQR)                  | 52 (45-59)  | 52 (47-58)  | N/A |
| Sex, No. (%)                               |             |             |     |
| Female                                     | 3,875 (36%) | 3,335 (31%) | N/A |
| Male                                       | 6,777 (64%) | 7,317 (69%) |     |
| Practice type, No. (%)                     |             |             |     |
| FHG                                        | 4,854 (46%) | 4,885 (46%) |     |
| FHO/FHN                                    | 1,859 (17%) | 1,718 (16%) | N/A |
| FHO/FHN-FHT                                | 3,374 (32%) | 3,027 (28%) |     |
| Other PEM                                  | 565 (5%)    | 1,022 (10%) |     |
| Practice size (enrolled patients), No. (%) |             |             |     |
| >1800 patients                             | 5,366 (50%) | 5,026 (47%) | N/A |

\*Standardized differences for physician level variables not reported as propensity scores were estimated using patient level characteristics only

\*\*Co-morbidity scored using number of Aggregated Diagnosis Groups (ADGs) using the Johns Hopkins Case Mix System

FHG = family health group

FHO/FHN = family health organizations or networks

Other PEM = other patient enrolled model of care

FOBT = fecal occult blood test

Tinmouth et al.  
Physician-linked mailed invitations for colorectal cancer screening

Table 4. Association between mailed invitation and FOBT completion or mailed invitation and FOBT or colonoscopy completion after adjusting for physician factors.

|                                   | FOBT completion       |         | FOBT or Colonoscopy completion |         |
|-----------------------------------|-----------------------|---------|--------------------------------|---------|
|                                   | Odds ratio (95% C.I.) | P-value | Odds ratio (95% C.I.)          | P-value |
| Mailed invitation                 |                       |         |                                |         |
| Yes (Pilot)                       | 3.3 (3.1, 3.6)        | <.0001  | 2.7 (2.5, 2.9)                 | <.0001  |
| No (Controls)                     | Reference             | N/A     | Reference                      | N/A     |
| Increasing age (per year)         | 1.0 ( 1.0, 1.0)       | NS      | 1.0 (1.0, 1.0)                 | 0.03    |
| Sex, No. (%)                      |                       |         |                                |         |
| Female                            | 1.0 (0.9, 1.1)        | NS      | 1.0 (0.9, 1.1)                 | NS      |
| Male                              | Reference             | N/A     | Reference                      | N/A     |
| Practice type, No. (%)            |                       |         |                                |         |
| FHG                               | 0.7 (0.6, 0.8)        | <.0001  | 0.7 (0.7, 0.8)                 | <.0001  |
| FHO/FHN                           | 0.8 (0.7, 0.9)        | <.0001  | 0.8 (0.7, 0.9)                 | <.0001  |
| Other PEM                         | 0.8 (0.7, 1.0)        | 0.03    | 0.8 (0.7, 1.0)                 | NS      |
| FHO/FHN-FHT                       | Reference             | N/A     | Reference                      | N/A     |
| Practice size (enrolled patients) |                       |         |                                |         |
| ≤ 1800 patients                   | 1.2 (1.1, 1.3)        | 0.0004  | 1.2 (1.1, 1.3)                 | <.0001  |
| > 1800 patients                   | Reference             | N/A     | Reference                      | N/A     |

FHG = family health group

FHO/FHN = family health organizations or networks

Other PEM = other patient enrolled model of care

FOBT = fecal occult blood test

1  
2  
3  
4  
5  
6  
7  
8  
9  
10  
11  
12  
13  
14  
15  
16  
17  
18  
19  
20  
21  
22  
23  
24  
25  
26  
27  
28  
29  
30  
31  
32  
33  
34  
35  
36  
37  
38  
39  
40  
41  
42  
43  
44  
45  
46  
47  
48  
49  
50  
51  
52  
53  
54  
55  
56  
57  
58  
59  
60

Tinmouth et al.  
Physician-linked mailed invitations for colorectal cancer screening

Figure Legends

Figure 1. Mock-up of physician-linked invitation used in the Pilot.

For peer review only



ColonCancerCheck | ContrôleCancerColorectal

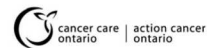

From the office of Dr. George Black

June 1, 2009

Lawren Harris  
456 Superior Street  
Lindsay ON K2L 3M4

Dear Lawren Harris:

**You have received this letter because it is time to be screened for colon cancer.** Our records as of April 1<sup>st</sup>, 2009 show that you have never had a fecal occult blood test (FOBT) or we do not know when you had your last FOBT. All adults between the ages of 50 and 74 years who are at average risk for colon cancer should do a FOBT every two years.

If your parent, brother, sister or child has had colon cancer, your risk is higher and you should have a colonoscopy.

**Please call my office to set up an appointment to talk about your risk for colon cancer and which test is right for you.**

If you have recently completed colon cancer screening, please disregard this letter.

I look forward to hearing from you soon.

*Dr. George Black*  
705-555-1212

**GET THE FACTS. GET CHECKED.**

- Colon cancer is the second most common cause of cancer death in Ontario
- Colon cancer can develop without any early warning signs.
- If it is caught early enough, 9 out of every 10 people can be cured.
- Regular screening is the best way to catch colon cancer early.
- The FOBT is a simple test that can be done at home.

For more information please visit [www.coloncancercheck.ca](http://www.coloncancercheck.ca)

This letter has been sent on my behalf by ColonCancerCheck (CCC), Ontario's colorectal cancer screening program. CCC is a collaborative initiative of the Ministry of Health and Long-Term Care and Cancer Care Ontario. If for any reason you do not wish to receive future correspondence from the program, simply call the ColonCancerCheck Information Line at 1-866-662-9233 during business hours.

161x209mm (300 x 300 DPI)

Tinmouth et al., Physician-linked mailed invitation to be screened improves uptake in an organized colorectal cancer screening program.

|                              | Item No | Recommendation                                                                                                                                                                                                                                                                                                                                                                                                                                                                                                                                                                                                                                                                                           | Page                                                                                                                  | Comment |
|------------------------------|---------|----------------------------------------------------------------------------------------------------------------------------------------------------------------------------------------------------------------------------------------------------------------------------------------------------------------------------------------------------------------------------------------------------------------------------------------------------------------------------------------------------------------------------------------------------------------------------------------------------------------------------------------------------------------------------------------------------------|-----------------------------------------------------------------------------------------------------------------------|---------|
| <b>Title and abstract</b>    | 1       | (a) Indicate the study's design with a commonly used term in the title or the abstract<br>(b) Provide in the abstract an informative and balanced summary of what was done and what was found                                                                                                                                                                                                                                                                                                                                                                                                                                                                                                            | 1, 3                                                                                                                  |         |
| <b>Introduction</b>          |         |                                                                                                                                                                                                                                                                                                                                                                                                                                                                                                                                                                                                                                                                                                          |                                                                                                                       |         |
| Background/ratio             | 2       | Explain the scientific background and rationale for the investigation being reported                                                                                                                                                                                                                                                                                                                                                                                                                                                                                                                                                                                                                     | 07-Jun                                                                                                                |         |
| Objectives                   | 3       | State specific objectives, including any prespecified hypotheses                                                                                                                                                                                                                                                                                                                                                                                                                                                                                                                                                                                                                                         | 7, first paragraph                                                                                                    |         |
| <b>Methods</b>               |         |                                                                                                                                                                                                                                                                                                                                                                                                                                                                                                                                                                                                                                                                                                          |                                                                                                                       |         |
| Study design                 | 4       | Present key elements of study design early in the paper                                                                                                                                                                                                                                                                                                                                                                                                                                                                                                                                                                                                                                                  | 7, paragraph 2                                                                                                        |         |
| Setting                      | 5       | Describe the setting, locations, and relevant dates, including periods of recruitment, exposure, follow-up, and data collection                                                                                                                                                                                                                                                                                                                                                                                                                                                                                                                                                                          | 7, paragraph 2                                                                                                        |         |
| Participants                 | 6       | (a) <i>Cohort study</i> —Give the eligibility criteria, and the sources and methods of selection of participants. Describe methods of follow-up<br><br><i>Case-control study</i> —Give the eligibility criteria, and the sources and methods of case ascertainment and control selection. Give the rationale for the choice of cases and controls<br><br><i>Cross-sectional study</i> —Give the eligibility criteria, and the sources and methods of selection of participants<br>(b) <i>Cohort study</i> —For matched studies, give matching criteria and number of exposed and unexposed<br><i>Case-control study</i> —For matched studies, give matching criteria and the number of controls per case | 9, paragraph 2,<br>10, paragraph 2<br>& 12, first<br>paragraph<br><br>n/a<br><br>n/a<br>12, first<br>paragraph<br>n/a |         |
| Variables                    | 7       | Clearly define all outcomes, exposures, predictors, potential confounders, and effect modifiers. Give diagnostic criteria, if applicable                                                                                                                                                                                                                                                                                                                                                                                                                                                                                                                                                                 | 9, 10 & 11                                                                                                            |         |
| Data sources/<br>measurement | 8*      | For each variable of interest, give sources of data and details of methods of assessment (measurement). Describe comparability of assessment methods if there is more than one group                                                                                                                                                                                                                                                                                                                                                                                                                                                                                                                     | 8, 9, 10 & 11                                                                                                         |         |
| Bias                         | 9       | Describe any efforts to address potential sources of bias                                                                                                                                                                                                                                                                                                                                                                                                                                                                                                                                                                                                                                                | 11, paragraph 2<br>& 13, paragraph                                                                                    |         |
| Study size                   | 10      | Explain how the study size was arrived at                                                                                                                                                                                                                                                                                                                                                                                                                                                                                                                                                                                                                                                                | 5, paragraph 1                                                                                                        |         |
| Quantitative<br>variables    | 11      | Explain how quantitative variables were handled in the analyses. If applicable, describe which groupings were chosen and why                                                                                                                                                                                                                                                                                                                                                                                                                                                                                                                                                                             |                                                                                                                       |         |
| Statistical<br>methods       | 12      | (a) Describe all statistical methods, including those used to control for confounding<br>(b) Describe any methods used to examine subgroups and interactions<br>(c) Explain how missing data were addressed<br><br>(d) <i>Cohort study</i> —If applicable, explain how loss to follow-up was addressed<br><br><i>Case-control study</i> —If applicable, explain how matching of cases and controls was addressed<br><i>Cross-sectional study</i> —If applicable, describe analytical methods taking account of sampling strategy<br>(e) Describe any sensitivity analyses                                                                                                                                | 11, paragraph 2<br>& 13, paragraph<br>n/a<br><br>14, first<br>paragraph<br><br>n/a<br><br>n/a<br>n/a<br>n/a           |         |
| <b>Results</b>               |         |                                                                                                                                                                                                                                                                                                                                                                                                                                                                                                                                                                                                                                                                                                          |                                                                                                                       |         |
| Participants                 | 13*     | (a) Report numbers of individuals at each stage of study—eg numbers potentially eligible, examined for eligibility, confirmed eligible, included in the study, completing follow-up, and analysed<br><br>(b) Give reasons for non-participation at each stage                                                                                                                                                                                                                                                                                                                                                                                                                                            | 14, first & last<br>paragraphs<br><br>14, first & last<br>paragraphs                                                  |         |

all patients followed through administrative data, therefore no loss to f/u

|                          |     |                                                                                                                                                                                                              |                                       |
|--------------------------|-----|--------------------------------------------------------------------------------------------------------------------------------------------------------------------------------------------------------------|---------------------------------------|
|                          |     | (c) Consider use of a flow diagram                                                                                                                                                                           | n/a                                   |
| Descriptive data         | 14* | (a) Give characteristics of study participants (eg demographic, clinical, social) and information on exposures and potential confounders                                                                     | Table 1 & Table 3                     |
|                          |     | (b) Indicate number of participants with missing data for each variable of interest                                                                                                                          | 15, first paragraph                   |
|                          |     | (c) <i>Cohort study</i> —Summarise follow-up time (eg, average and total amount)                                                                                                                             | all followed up for 6 months          |
| Outcome data             | 15* | <i>Cohort study</i> —Report numbers of outcome events or summary measures over time                                                                                                                          | 15, 2nd paragraph & 16, 1st paragraph |
|                          |     | <i>Case-control study</i> — Report numbers in each exposure category, or summary measures of exposure                                                                                                        | n/a                                   |
|                          |     | <i>Cross-sectional study</i> —Report numbers of outcome events or summary measures                                                                                                                           | n/a                                   |
| Main results             | 16  | (a) Give unadjusted estimates and, if applicable, confounder-adjusted estimates and their precision (eg, 95% confidence interval). Make clear which confounders were adjusted for and why they were included | 15, 2nd paragraph, Tables 2 & 4       |
|                          |     | (b) Report category boundaries when continuous variables were categorized                                                                                                                                    | Tables 2 & 4                          |
|                          |     | (c) If relevant, consider translating estimates of relative risk into absolute risk for a meaningful time period                                                                                             | n/a                                   |
| Other analyses           | 17  | Report other analyses done—eg analyses of subgroups and interactions, and sensitivity analyses                                                                                                               | n/a                                   |
| <b>Discussion</b>        |     |                                                                                                                                                                                                              |                                       |
| Key results              | 18  | Summarise key results with reference to study objectives                                                                                                                                                     | 16, paragraph 1                       |
| Limitations              | 19  | Discuss limitations of the study, taking into account sources of potential bias or imprecision. Discuss both direction and magnitude of any potential bias                                                   | 18, 2nd paragraph                     |
| Interpretation           | 20  | Give a cautious overall interpretation of results considering objectives, limitations, multiplicity of analyses, results from similar studies, and other relevant evidence                                   | 17 & 18                               |
| Generalisability         | 21  | Discuss the generalisability (external validity) of the study results                                                                                                                                        | 18, last paragraph                    |
| <b>Other information</b> |     |                                                                                                                                                                                                              |                                       |
| Funding                  | 22  | Give the source of funding and the role of the funders for the present study and, if applicable, for the original study on which the present article is based                                                | 19, 20                                |
